# Supplementary material for: Objectively measured sedentary time and physical activity in women with fibromyalgia: a cross-sectional study
Source: PubMed Central journal article supplement — BMJ Open. 2013 Jun 4;3(6):e002722. doi: 10.1136/bmjopen-2013-002722 (PMC3686217; doi:10.1136/bmjopen-2013-002722), 2013-06-04
Supplement: bmjopen-2013-002722.draft_revisions.pdf [file bmjopen-2013-002722.draft_revisions.pdf]

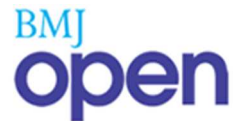

**Objectively measured sedentary time and physical activity  
in women with fibromyalgia**

|                                 |                                                                                                                                                                                                                                                                                                                                                                                                                                                                                                                                                                                                                                                  |
|---------------------------------|--------------------------------------------------------------------------------------------------------------------------------------------------------------------------------------------------------------------------------------------------------------------------------------------------------------------------------------------------------------------------------------------------------------------------------------------------------------------------------------------------------------------------------------------------------------------------------------------------------------------------------------------------|
| Journal:                        | <i>BMJ Open</i>                                                                                                                                                                                                                                                                                                                                                                                                                                                                                                                                                                                                                                  |
| Manuscript ID:                  | bmjopen-2013-002722                                                                                                                                                                                                                                                                                                                                                                                                                                                                                                                                                                                                                              |
| Article Type:                   | Research                                                                                                                                                                                                                                                                                                                                                                                                                                                                                                                                                                                                                                         |
| Date Submitted by the Author:   | 13-Feb-2013                                                                                                                                                                                                                                                                                                                                                                                                                                                                                                                                                                                                                                      |
| Complete List of Authors:       | Ruiz, Jonatan; Karolinska Institutet, Department of Biosciences and Nutrition<br>Segura-Jiménez, Victor<br>Ortega, Francisco; University of Granada and Karolinska Institutet<br>Alvarez, Inmaculada; University of Granada, Physical Education and Sport<br>Camiletti, Daniel; University of Granada, Department of Physiology<br>Aparicio, Virginia<br>Carbonell-Baeza, Ana; University of Granada, 1. Department of Physical Education and Sport<br>Femia, Pedro; University of Granada, Department of Physiology<br>Munguia-Izquierdo, Diego<br>Delgado-Fernández, Manuel; University of Granada, Department of Physical Education and Sport |
| <b>Primary Subject Heading</b>: | Public health                                                                                                                                                                                                                                                                                                                                                                                                                                                                                                                                                                                                                                    |
| Secondary Subject Heading:      | Epidemiology, Rheumatology                                                                                                                                                                                                                                                                                                                                                                                                                                                                                                                                                                                                                       |
| Keywords:                       | EPIDEMIOLOGY, PREVENTIVE MEDICINE, PUBLIC HEALTH, RHEUMATOLOGY                                                                                                                                                                                                                                                                                                                                                                                                                                                                                                                                                                                   |
|                                 |                                                                                                                                                                                                                                                                                                                                                                                                                                                                                                                                                                                                                                                  |

SCHOLARONE™  
Manuscripts

1  
2  
3  
4  
5  
6  
7 **Objectively measured sedentary time and physical activity in women with fibromyalgia;**

8  
9 **A cross-sectional study**

10  
11  
12  
13  
14  
15  
16 Jonatan R Ruiz<sup>1\*</sup>, Víctor Segura-Jiménez<sup>1</sup>, Francisco B Ortega<sup>1</sup>, Inmaculada C Álvarez-  
17 Gallardo<sup>1</sup>, Daniel Camiletti-Moirón<sup>1,2</sup>, Virginia A Aparicio<sup>1,2</sup>, Ana Carbonell-Baeza<sup>1,3</sup>, Pedro  
18 Femia<sup>4</sup>, Diego Munguía-Izquierdo<sup>5</sup>, Manuel Delgado-Fernández<sup>1</sup>  
19  
20  
21  
22  
23  
24  
25  
26

27 <sup>1</sup>Department of Physical Education and Sport, School of Sport Sciences, University of  
28 Granada, Granada, Spain  
29  
30

31 <sup>2</sup>Department of Physiology, School of Pharmacy, University of Granada, Granada, Spain  
32  
33

34 <sup>3</sup>Department of Physical Education, School of Education, University of Cadiz, Cadiz, Spain  
35  
36

37 <sup>4</sup>Department of Biostatistics, School of Medicine, University of Granada, Granada, Spain  
38  
39

40 <sup>5</sup>Department of Physical Education and Sports, University Pablo de Olavide, Seville, Spain  
41  
42

43 **\*Address for correspondence:** Jonatan R. Ruiz, PhD. Department of Physical Education and  
44 Sport, School of Sport Sciences. University of Granada, Granada, Spain; [ruizj@ugr.es](mailto:ruizj@ugr.es)  
45  
46  
47  
48  
49  
50  
51  
52  
53  
54  
55  
56  
57  
58  
59  
60

## ARTICLE SUMMARY

### Article focus:

- To characterize the levels of objectively measure (i.e. through accelerometry) sedentary time and physical activity among women with fibromyalgia.
- To provide estimates of the adherence to recommended levels of physical activity assessed by accelerometer (30 minutes of at least moderate intensity physical activity on 5 of 7 days).

### Key Messages

- Over 60% of women with fibromyalgia meet the physical activity recommendations, that is, 30 min/day of at least moderate intensity physical activity on 5 or more days a week.
- These women spent on average 71% (approximately 10 hours/day) of their waking time in activities that expend little energy.
- Women with fibromyalgia spent at least on average 10 min less on MVPA and 22 min less on sedentary behaviours during weekends compared with week days.

### Strengths and Limitations

- Strict standardization of the fieldwork, and the fact that all women were compliant with the measurements procedures is a strength.
- All women had 7 valid days with at least 10 hours of registered time during waking hours.
- To avoid any kind of immediate reactivity, we removed from the analysis the first day of monitoring.
- The cross-sectional design of our study does not allow however establishing any causal relationships. The sample is of convenience, which includes the known limitations of all non-probability

- The accelerometer underestimates physical activities that involve upper body movement, those with minimal vertical displacement such as cycling, water-based activities such as swimming, and it does not capture well the extra energy cost of load-bearing activities.

For peer review only

## ABSTRACT

**Objectives:** To characterize levels of objectively measured sedentary time and physical activity in women with fibromyalgia.

**Design:** Cross-sectional study.

**Setting:** Local Association of Fibromyalgia (Granada, Spain).

**Participants:** The study comprised 94 women with diagnosed fibromyalgia who did not have other severe somatic or psychiatric disorders, or other diseases that prevent physical loading, able to ambulate and to communicate, and capable and willing to provide informed consent.

**Primary outcome measures:** Sedentary time and physical activity was measured by accelerometry and was expressed as time spent in sedentary behaviours, average intensity (counts/minute) and amount of time (minutes/day) spent in moderate and in moderate-to vigorous-intensity physical activity (MVPA).

**Results:** The proportion of women meeting the physical activity recommendations of 30 min/day of at least moderate intensity physical activity on 5 or more days a week was 60.6%. Women spent on average 71% of their waking time (approximately 10 hours/day) in sedentary behaviours. Both sedentary behaviour and physical activity levels were similar across age groups, waist circumference and percentage body fat categories, years since clinical diagnosis, marital status, educational level, occupational status, as well as regardless the severity of the disease (all  $P > 0.1$ ). Time spent at moderate physical activity and MVPA was however lower in those with greater BMI (-6.6 min and -7 min, respectively, per body mass index category increase,  $< 25$ ,  $25-30$ ,  $> 30$  kg/m<sup>2</sup>; P values for trend were 0.056 and 0.051, respectively). Women spent on average 10 min less on MVPA ( $P < 0.001$ ) and 22 min less on sedentary behaviours during weekends compared with week days ( $P = 0.051$ ).

**Conclusions:** These data provide an objective measure of amount of time spent in sedentary activities and in physical activity in women with fibromyalgia.

1  
2  
3  
4  
5  
6  
7  
8  
9  
10  
11  
12  
13  
14  
15  
16  
17  
18  
19  
20  
21  
22  
23  
24  
25  
26  
27  
28  
29  
30  
31  
32  
33  
34  
35  
36  
37  
38  
39  
40  
41  
42  
43  
44  
45  
46  
47  
48  
49  
50  
51  
52  
53  
54  
55  
56  
57  
58  
59  
60

Extra data is available by emailing [ruizj@ugr.es](mailto:ruizj@ugr.es)

For peer review only

## INTRODUCTION

Fibromyalgia is a pain regulation-related disorder<sup>1</sup>. Patients usually present an increased sensitivity to painful stimuli (hyperalgesia) and lowered pain threshold (allodynia). Additionally to pain, fibromyalgia symptoms typically include severe fatigue, sleep disturbances, paresthesia of extremities, depression, anxiety, joint stiffness, and memory and cognitive difficulties<sup>1,2</sup>. Fibromyalgia is becoming a common syndrome in Western European countries, and estimates indicate a point prevalence of 2.9% that would translate to approximately 6 million people with fibromyalgia<sup>3</sup>.

There is increasing evidence about the potential benefits of regular physical activity on fibromyalgia-related symptoms<sup>4-7</sup>, and International organizations supports the use of physical activity-based interventions as a complementary tool in the therapeutic armamentarium against fibromyalgia<sup>8</sup>. Physical inactivity is one of the major public health problems of the 21<sup>st</sup> century<sup>9</sup>, and several longitudinal studies showed the negative consequences for health of a sedentary lifestyle<sup>10,11</sup>.

The average amount of daily sedentary time as well as physical activity levels and patterns in women with fibromyalgia is rather unknown, and the available information is mainly based on questionnaire data<sup>12-16</sup>. However, physical activities are difficult to recall, quantify and categorize, and it might be even more complex in people with memory and cognitive difficulties such as fibromyalgia patients<sup>14</sup>. Given the limitations of self-report methods, accelerometry (i.e. movement sensors) has become the method of choice for objectively measuring physical activity in free-living conditions. To have an objective diagnosis of the sedentary time as well as of the physical activity levels and patterns in patients with fibromyalgia is of public health and of clinical interest, and might be informative for developing intervention studies directed to the promotion of physical activity in women with fibromyalgia<sup>17</sup>.

1  
2  
3 The purpose of the present study was to characterize the levels of objectively measure  
4 (i.e. through accelerometry) sedentary time and physical activity among women with  
5 fibromyalgia, and to provide estimates of the adherence to recommended levels of physical  
6 activity assessed by accelerometer (30 minutes of at least moderate intensity physical activity  
7 on 5 of 7 days).  
8  
9  
10  
11  
12  
13  
14  
15  
16  
17  
18  
19  
20  
21  
22  
23  
24  
25  
26  
27  
28  
29  
30  
31  
32  
33  
34  
35  
36  
37  
38  
39  
40  
41  
42  
43  
44  
45  
46  
47  
48  
49  
50  
51  
52  
53  
54  
55  
56  
57  
58  
59  
60

For peer review only



## MATERIAL AND METHODS

### Study participants

We sent a formal invitation to participate in the study to all members of a Local Association of Fibromyalgia (Granada, Spain). A total of 116 patients responded, and gave their written informed consent after receiving detailed information about the aims and study procedures. Participants were included in the study if: (i) they met the diagnosis of fibromyalgia according to the American College of Rheumatology criteria<sup>18</sup>, (ii) did not have other severe somatic or psychiatric disorders, or other diseases that prevent physical loading (answer “no” to all questions on the Physical Activity Readiness Questionnaire-PAR-Q<sup>19 20</sup>, (iii) were able to ambulate and to communicate, (iv) and were capable and willing to provide informed consent. Men were not included in the study (n=6), and women with incomplete physical activity data (n=5) or technical errors in the instrument (n=11) were excluded. A final sample of 94 women with fibromyalgia participated in the study. Age, weight and height, and fibromyalgia severity (assessed by the fibromyalgia impact questionnaire, FIQ)<sup>21 22</sup> was similar between the included and excluded participants (all P>0.1). The study protocol was reviewed and approved by the Ethics Committee of the Hospital Virgen de las Nieves (Granada, Spain). The STROBE guidelines were followed during the course of the research<sup>23</sup>.

### Measurements

Women were interviewed in the Association of Fibromyalgia (Granada, Spain). They were asked to wear an accelerometer (Actigraph<sup>TM</sup> GT1M, Pensacola, FL, USA) for 9 consecutive days starting the same day that they received the monitor. The accelerometer was carried over the whole day (24 hrs) except during water-based activities such as bathing or swimming. Accelerometers were initialized as described by the manufacturer, and data were saved in 5 s epochs. Women wore the device on the lower back, secured with an elastic belt, underneath

1  
2  
3 clothing, near to the center of gravity. The data were downloaded onto a computer using the  
4  
5 manufacturer software. Data reduction, cleaning, and analyses were performed using the  
6  
7 MAHUFFe program (see [www.mrc-epid.cam.ac.uk](http://www.mrc-epid.cam.ac.uk)).  
8

9  
10 Monitor wearing time was calculated by subtracting the sleeping reported time  
11  
12 (recorded through a diary) from the total registered time for the entire day (i.e. 1440 minutes).  
13  
14 Bouts of 60 continuous minutes of 0 activity intensity counts were also excluded from the  
15  
16 analysis, considering these periods as non-wearing time. A recording of more than 20,000  
17  
18 counts per minute (cpm) was considered as a potential malfunction of the accelerometer and  
19  
20 the value was excluded from the analyses. The first day of recording was not included in the  
21  
22 analysis, neither did the last one. A total of 7 days of recording with a minimum of 10 or more  
23  
24 hours of registration per day was necessary to be included in the study analysis.  
25  
26

27  
28 Sedentary time was estimated as the amount of time accumulated below 100 cpm  
29  
30 during periods of wear time<sup>24</sup>. Time spent being sedentary was expressed as total duration  
31  
32 (hours/day). Physical activity levels were estimated as follows: (i) Average physical activity,  
33  
34 expressed as mean cpm, is a measure of overall physical activity. We calculated mean counts  
35  
36 per minute by dividing the sum of total counts per epoch for a valid day by the number of  
37  
38 minutes of wear time in that day across all valid days (n=7). (ii) Time engaged in moderate  
39  
40 physical activity. We calculated the time engaged in moderate physical activity based upon a  
41  
42 standardized cut-off of 1952-5724 cpm<sup>25 26</sup>, where 1952 cpm corresponds to walking at 4  
43  
44 km/hour<sup>26</sup>. (iii) We also calculated the time engaged in at least moderate physical activity,  
45  
46 including also vigorous intensity (so called, moderate-vigorous physical activity, MVPA), as  
47  
48 the amount of time accumulated  $\geq 1925$  cpm. Sedentary time, as well as the study physical  
49  
50 activity variables was calculated for week days and weekends. We calculated the proportion  
51  
52 of women meeting the physical activity recommendations, that is 30 minutes/day of at least  
53  
54 moderate-intensity activity on at least 5 of 7 days<sup>27 28</sup>.  
55  
56  
57  
58  
59  
60

1  
2  
3 Weight and height were measured following standard procedures with a scale (InBody  
4 720, Biospace, Seoul, Korea) and a stadiometer (Seca 22, Hamburg, Germany), respectively,  
5 and body mass index (BMI, weight in kg divided by height in m<sup>2</sup>) was calculated. Percentage  
6 body fat was measured with bioelectrical impedance analysis (InBody R20; Biospace,  
7 Gateshead, UK). Waist circumference was measured at the level of the umbilicus (Harpenden  
8 anthropometric tape Holtain Ltd). Adiposity exposure groups were based on standard clinical  
9 definitions for BMI (normal weight: 18.5-24.9 kg/m<sup>2</sup>, overweight: 25.0-29.9 kg/m<sup>2</sup>, obese:  
10 30.0 kg/m<sup>2</sup> or higher); percent body fat (normal: <30%; obese: ≥30%); and waist  
11 circumference (normal: ≤ 80.0 cm; abdominal obesity: > 80 cm). Only one women had a BMI  
12 below 18.5 (18 kg/m<sup>2</sup>), and was considered to be as normal weight.  
13  
14  
15  
16  
17  
18  
19  
20  
21  
22  
23  
24

25 Fibromyalgia severity was assessed with the fibromyalgia impact questionnaire (FIQ)  
26  
27<sup>21 22</sup>. FIQ is composed of ten subscales: physical impairment, overall well being, work missed,  
28 job difficulty, pain, fatigue, morning tiredness, stiffness, anxiety and depression. The score of  
29 each subscale is standardized from 0 to 10. We summed the score of all items, so that the total  
30 score range from 0 to 100, with a higher score indicating greater severity. Women were  
31 categorized into two groups based on the FIQ total score following published thresholds as  
32 FIQ <70 and FIQ ≥70, which corresponds to having moderate or severe fibromyalgia,  
33 respectively<sup>29</sup>.  
34  
35  
36  
37  
38  
39  
40  
41  
42  
43  
44

### 45 **Statistical analysis**

46 All statistical analyses were performed with PASW (Predictive Analytics SoftWare, v. 18.0  
47 SPSS Inc., Chicago, IL, USA), and the level of significance was set at  $\alpha = 0.05$ . Physical  
48 activity and sedentary outcome variables were logarithmically transformed to obtain a normal  
49 distribution.  
50  
51  
52  
53  
54  
55  
56  
57  
58  
59  
60

1  
2  
3 We calculated the estimated means of sedentary time, average physical activity,  
4 moderate physical activity and MVPA by age group, body mass index and waist  
5 circumference category, years since clinical diagnosis, fibromyalgia severity, marital status,  
6 educational level and occupational status with analysis of covariance (ANCOVA) adjusting  
7 for registered time. Lineal regression analyses were conducted to examine the association of  
8 sedentary time, average physical activity, moderate physical activity and MVPA with age  
9 group, body mass index, waist circumference and percentage body fat category, years since  
10 clinical diagnosis, fibromyalgia severity, marital status, educational level and occupational  
11 status by inserting sedentary time and each physical activity outcome variable in separate  
12 models as dependent variable; age group, body mass index, waist circumference and  
13 percentage body fat category, years since clinical diagnosis, fibromyalgia severity, marital  
14 status, educational level and occupational status as independent variables (inserted as ordinal  
15 variables); and registered time as confounder.  
16  
17  
18  
19  
20  
21  
22  
23  
24  
25  
26  
27  
28  
29  
30  
31

32 Mean differences of average sedentary time, physical activity, moderate physical  
33 activity and MVPA on week days (Monday to Friday) and on weekend (Saturday and  
34 Sunday) were calculated with ANOVA for repeated measures.  
35  
36  
37

38 We analysed the association of meeting the physical activity recommendations (at  
39 least 30 minutes/day of MVPA on 5 of 7 days a week) with age, body mass index, waist  
40 circumference and percentage body fat, years since clinical diagnosis, fibromyalgia severity,  
41 marital status, educational level and occupational status using binary logistic regression  
42 analysis.  
43  
44  
45  
46  
47  
48  
49  
50  
51  
52  
53  
54  
55  
56  
57  
58  
59  
60

## RESULTS

All participants had 7 valid days of registration. Mean registered time during waking time was 842±108 minutes/day (~14±1.8 hours). Sedentary time and physical activity intensity levels were similar across age groups, waist circumference and percentage body fat categories, years since clinical diagnosis, fibromyalgia severity, marital status, educational level and occupational status (all  $P>0.1$ , Table 1). Moderate physical activity and MVPA were lower in women with greater BMI (-6.6 min and -7 min, respectively, per BMI category increase;  $P$  values for trend were 0.056 and 0.051, respectively). Mean estimates of sedentary time and physical activity intensity levels were similar in women with FIQ <70 compared with those with FIQ  $\geq 70$  (all  $P>0.1$ , Table 1), and the findings persisted when other FIQ threshold (>59 vs.  $\geq 59$ ) was used<sup>30</sup> (data not shown).

The proportion of women meeting the physical activity recommendations by age group, BMI, waist circumference and percentage body fat categories, years since clinical diagnosis, fibromyalgia severity, marital status, educational level and occupational status are shown in Table 2. The proportion of women meeting the physical activity recommendations were 60.6% ( $n=57$ , 95%CI: 55.9-65.3%). The OR of meeting the physical activity recommendations tend to be lower in the older group (OR: 0.542, 95%CI: 0.231-1.237,  $P=0.160$ ), in those with a high waist circumference (OR: 0.556, 95%CI: 0.235-1.312,  $P=0.180$ ), and in those diagnosed more than 5 years ago (OR: 0.485, 95%CI: 0.206-1.142,  $P=0.098$ ) (Table 3). The OR of meeting the physical activity recommendations was higher in non-overweight (BMI <25kg/m<sup>2</sup>) and in the overweight (BMI=25-30kg/m<sup>2</sup>) group compared with the obese peers (OR: 2.046, 95%CI: 0.698-5.997,  $P=0.192$ ; OR: 2.252, 95%CI: 0.794-6.385,  $P=0.127$ ) (Table 4). Unemployed women had also higher OR of meeting the recommendations (OR: 2.545, 95%CI: 0.902-7.187,  $P=0.078$ ). The OR of meeting the physical activity recommendations were lower in women with FIQ  $\geq 70$  (OR: 0.690, 95%CI:

1  
2  
3 0.294-1.620, P=0.395). The findings persisted when another suggested FIQ threshold (>59 vs.  
4 ≥59) was used <sup>30</sup> (data not shown). Women spent on average 71% of their waking time  
5  
6 (approximately 10 hours/day) in sedentary behaviours.  
7  
8

9  
10 Sedentary time and physical activity levels during week time (Monday to Friday) and  
11 during weekend time (Saturday and Sunday) in women with fibromyalgia are shown in table  
12 4. Mean levels of physical activity were lower during weekend compared with those  
13 registered during week days (mean difference: 24 cpm, 95%CI: 7.8-40.2, P=0.004). Likewise,  
14 registered time at moderate physical activity and at MVPA was lower during weekend days  
15 (mean difference: 10.5 min/day, 95%CI: 5.5-15.5, P<0.001; and 10.6 min/day, 95%CI: 5.5-  
16 15.6, P<0.001), respectively). Registered sedentary time was also lower during weekends  
17 (mean difference: 22.6 min/day, 95%CI: 0-45.3, P=0.051). Figure 1 shows the sedentary time  
18 and physical activity mean time by week and weekend days.  
19  
20  
21  
22  
23  
24  
25  
26  
27  
28

29 The results did not change when the analyses were adjusted for registered time, or  
30 when all variables were entered together in the model (data not shown).  
31  
32  
33  
34  
35  
36  
37  
38  
39  
40  
41  
42  
43  
44  
45  
46  
47  
48  
49  
50  
51  
52  
53  
54  
55  
56  
57  
58  
59  
60

## DISCUSSION

The main purpose of the present study was to characterize sedentary time and physical activity in women with diagnosed fibromyalgia, as well as to describe the adherence to recommended levels of physical activity assessed by accelerometer. Over half of the women (60.6%) met the physical activity recommendations (30 min/day of at least moderate intensity physical activity on 5 or more days a week). These women spent on average 71% (approximately 10 hours/day) of their waking time in sedentary behaviours, that is, in activities that expend little energy. We observed that both sedentary behaviour times and physical activity levels were similar across the study demographic factors as well as regardless the severity of the disease. Physical activity (i.e. moderate and MVPA) was however lower in those with greater BMI. Women spent at least on average 10 min less on MVPA and 22 min less on sedentary behaviours during weekends compared with week days.

To our knowledge, this is the first comparable objective quantification of sedentary time and physical activity in women with fibromyalgia. Despite the number of participants in the present study is relatively small, to date, this is the largest series described in adults. We do not know whether these findings apply to men, therefore, future studies should quantify both sedentary time and physical activity in this group of patients. We<sup>31</sup> and others<sup>32</sup> observed gender differences in patients with fibromyalgia, therefore studies focused on examining gender differences on sedentary time and physical activity will provide further insights on whether preventive and interventions strategies should be gender-specific. Modifiable lifestyle factors, such as physical activity, may have a great potential as a public health instrument to prevent and contribute to the treatment of fibromyalgia. Longitudinal studies are also needed to further understand the predictive value of sedentary behaviours and physical activity over the course of the disease, and whether preventive strategies should start already at the early stages of the disease development. To have an objective estimate of the

1  
2  
3 patient's sedentary behaviour as well as the engagement in physical activity could be used as  
4  
5 a potential tool to increase the effectiveness of treatment approaches to reduce disability and  
6  
7 enhance quality of life in people with fibromyalgia. Indeed, Fontaine et al.<sup>33</sup> observed that  
8  
9 accumulating 30 minutes of lifestyle physical activity throughout the day produces clinically  
10  
11 relevant changes in perceived physical function and pain in previously minimally active  
12  
13 adults with fibromyalgia.  
14

15  
16 The present study showed that 60.6% percent of women met the recommendation to  
17  
18 accumulate 30 or more min/day of physical activity of at least moderate intensity on most  
19  
20 days of the week. The variation in meeting the recommendations was not associated with the  
21  
22 study demographic factors, and despite the prevalence of meeting the recommendations tend  
23  
24 to be lower in the older group, in the overweight group and in those with a higher waist  
25  
26 circumference, in those diagnosed with fibromyalgia more than 5 years ago, and in the retired  
27  
28 group, the associations were not statistically significant. Time spent at moderate physical  
29  
30 activity and MVPA was however lower in those with greater BMI (-6.6 min and -7 min,  
31  
32 respectively, per BMI category increase, <25, 25-30, >30 kg/m<sup>2</sup>), which concur with studies  
33  
34 in healthy adults<sup>25</sup>. This may have important health implications since obese female  
35  
36 fibromyalgia patients seem to have higher levels of pain, anxiety and depression and worse  
37  
38 quality of life, as well as lower functional capacity than their normal-weight peers<sup>34</sup>.  
39  
40  
41  
42

43 Despite several attempts have been made to objectively quantify sedentary behaviours  
44  
45 and physical activity levels and patterns<sup>12 13 35-38</sup>, to our knowledge, there are no previous  
46  
47 studies showing the prevalence of meeting the physical activity recommendations in women  
48  
49 with fibromyalgia, which hamper between study comparisons. McLoughlin et al.<sup>13</sup> measured  
50  
51 physical activity with accelerometry in 26 female fibromyalgia patients aged 42.7±12 years,  
52  
53 yet they did not show the prevalence of meeting the recommendations. They showed however  
54  
55 that time spent at moderate intensity using the same intensity threshold as used in the present  
56  
57  
58  
59  
60



1  
2  
3 study <sup>26</sup> was 15±8 minutes/day which is on average ~35 min lower (taking the 51-75 years  
4  
5 age group as a reference) than the time observed in the present study. Kaleth et al. <sup>12</sup> also  
6  
7 measured physical activity with accelerometry in 30 fibromyalgia patients (27 women), but  
8  
9 unfortunately, they showed no physical activity estimates. Kashikar-Zuck et al. <sup>38</sup> measured  
10  
11 physical activity with accelerometry in a juvenile primary fibromyalgia syndrome group of  
12  
13 adolescents and showed that only 23% achieved 30 minutes/day of at least moderate intensity  
14  
15 physical activity, and that only 1 patient achieved the recommended levels of physical activity  
16  
17 for their age, that is 60 minutes/day of at least moderate intensity physical activity <sup>27 28</sup>. Data  
18  
19 coming from apparently healthy women showed lower rates of meeting the recommendation  
20  
21 than those observed in the present study. Hagströmer et al. <sup>25</sup> reported that 48% of a  
22  
23 representative sample of Swedish women accumulated 30 minutes/day of MVPA, whereas  
24  
25 Troiano et al. <sup>39</sup> showed that less than 5% of a representative sample of women from U.S  
26  
27 (2003–2004 National Health and Nutritional Examination Survey) met the physical activity  
28  
29 recommendations. Both cultural and methodological procedures followed to measure physical  
30  
31 activity may partially explain these differences.  
32  
33  
34  
35

36 Sedentary behaviours refer to those activities that do not increase resting energy  
37  
38 expenditure substantially, that is, no more than 1.5 times resting energy expenditure <sup>40</sup>. These  
39  
40 activities involved sitting, reclining and lying down such as watching television, studying,  
41  
42 reading, etc. In the present study we observed that women spend on average 10 hours/day  
43  
44 (~71%) of their waking time in sedentary activities. Mcloughlin et al. <sup>13</sup> also measured  
45  
46 sedentary time with accelerometry, yet data are not comparable with our study because they  
47  
48 included sleeping time as a sedentary activity, despite they described that women removed the  
49  
50 accelerometer when they planned to sleep. They reported that women with fibromyalgia  
51  
52 spend 1154±59 minutes/day at sedentary behaviours, which together with the registered time  
53  
54 in other physical activity intensities summed ~1440 min, which is a full day. We observed no  
55  
56  
57  
58  
59  
60

1  
2  
3 association of sedentary time with any of the study demographic factors. Similarly, women  
4  
5 with a higher severity of the disease ( $FIQ \geq 70$ ) showed similar sedentary patterns as those with  
6  
7 a  $FIQ < 70$ , which concur with other studies <sup>13</sup>.

8  
9  
10 In the present study, women with fibromyalgia spend less time (~10 minutes/day) on  
11  
12 at least moderate intensity physical activity and on sedentary time (~22 minutes/day) during  
13  
14 weekends compared with week days. These findings are in agreement with others studies <sup>41</sup>.  
15  
16 The observed physical activity reduction during weekends could be partially explained by a  
17  
18 reduced transport-related physical activity when commuting to or from work, whereas the  
19  
20 reduction of sedentary time could be due to a reduced work-related sitting time. More studies  
21  
22 quantifying and characterizing physical activity and sedentary patterns during weekends and  
23  
24 week days are needed.  
25  
26

27  
28 The present study has several limitations. The cross-sectional design of our study does  
29  
30 not allow establishing any causal relationships. The sample is of convenience, which includes  
31  
32 the known limitations of all non-probability samples, including less representativeness and  
33  
34 unknown levels of sampling error. Further studies involving randomly recruited, consecutive  
35  
36 patients with fibromyalgia are needed. It should be mentioned that the accelerometer  
37  
38 underestimates physical activities that involve upper body movement, those with minimal  
39  
40 vertical displacement such as cycling, water-based activities such as swimming, and it does  
41  
42 not capture well the extra energy cost of load-bearing activities. However, walking is the most  
43  
44 prevalent leisure-time physical activity among women with fibromyalgia <sup>15</sup>, and we believe is  
45  
46 the type of activity they do at work and for transportation. We do not present data on vigorous  
47  
48 physical activity because the time at this intensity range from 0 to 2 min, as it can be observed  
49  
50 in table 1 (subtract moderate intensity to MVPA). On average, ~98% of the time spend at  
51  
52 MVPA is moderate intensity physical activity. This is consistent with our clinical knowledge  
53  
54 of this population, and concur with data from apparently healthy women from Sweden <sup>25</sup>.  
55  
56  
57  
58  
59  
60

1  
2  
3 These low levels of vigorous physical activity could also reflect that the cut point for this  
4 intensity was too high, thereby missing many minutes of activity in our population that should  
5 have been classified as vigorous physical activity. We have no data on an age-matched group  
6 of healthy women, so that direct comparison cannot be made. McLoughlin et al.<sup>13</sup> observed  
7 that female fibromyalgia patients (n=26) were less active than a group of healthy women  
8 (n=26), yet the healthy group was younger and had higher level of education than the patients  
9 group. One of the advantages of the present study was however the strict standardization of  
10 the fieldwork, and the fact that all women were compliant with the measurements procedures.  
11 All women had 7 valid days with at least 10 hours of registered time during waking hours.  
12 Indeed, the mean daily accelerometer wear time was 14±1.8 hours/day. We do not know  
13 whether women modified their habitual sedentary behavior or physical activity during the  
14 days they were monitored despite they were advised to keep on with their normal life. To  
15 avoid any kind of immediate reactivity, we removed from the analysis the first day of  
16 monitoring.  
17  
18  
19  
20  
21  
22  
23  
24  
25  
26  
27  
28  
29  
30  
31  
32  
33

34 In summary, these data provide an objective measure of amount of time spent in  
35 sedentary activities and in physical activity in women with fibromyalgia. These estimates can  
36 be used for comparisons with other rheumatologic diseases, as baseline reference levels for  
37 monitoring, and to assess the effectiveness of intervention strategies promoting physical  
38 activity in women with fibromyalgia.  
39  
40  
41  
42  
43  
44  
45  
46

### 47 **Acknowledgments**

48  
49 The authors gratefully acknowledge all women for their collaboration. We also acknowledge  
50 the AGRAFIM (association of fibromyalgia from Granada, southern Spain) members  
51 involved in the field work for their effort and great enthusiasm.  
52  
53  
54  
55  
56  
57  
58  
59  
60

**Funding**

This study was supported by the Consejería de Turismo, Comercio y Deporte (CTCD-201000019242-TRA), the Spanish Ministry of Science and Innovation (I+D+I DEP2010-15639, grants: BES-2009-013442, BES-2011-047133, RYC-2010-05957, RYC-2011-09011), the Spanish Ministry of Education (AP-2009-3173 and AP2010-0963), Granada Research of Excellence Initiative on Biohealth (GREIB), Campus BioTic, University of Granada, Spain and the European University of Madrid, Escuela de Estudios Universitarios Real Madrid (2010/04RM).

**Competing Interests**

None

**Author contributions**

JRR: Conception and design of the study, data collection, statistical analysis and interpretation of data, drafting the article

VS: Data collection, interpretation of data, and revising the article critically for important intellectual content

FOP: Conception and design of the study, interpretation of data, and revising the article critically for important intellectual content

IAG: Data collection, interpretation of data, and revising the article critically for important intellectual content

DCM: Data collection, interpretation of data, and revising the article critically for important intellectual content

VAA: Conception and design of the study, data collection, interpretation of data, and revising the article critically for important intellectual content

ACB: Conception and design of the study, data collection, interpretation of data, and revising the article critically for important intellectual content

PF: Statistical analysis, interpretation of data, and revising the article critically for important intellectual content

DMI: Interpretation of data, and revising the article critically for important intellectual content

MDF: Conception and design of the study, data collection, interpretation of data, and revising the article critically for important intellectual content

**Data Sharing**

Extra data is available by emailing [ruizj@ugr.es](mailto:ruizj@ugr.es)

## REFERENCES

1. Bennett RM. Clinical manifestations and diagnosis of fibromyalgia. *Rheum Dis Clin North Am* 2009;**35**(2):215-32.
2. Wilson HD, Robinson JP, Turk DC. Toward the identification of symptom patterns in people with fibromyalgia. *Arthritis Rheum* 2009;**61**(4):527-34.
3. Branco JC, Bannwarth B, Failde I, et al. Prevalence of fibromyalgia: a survey in five European countries. *Semin Arthritis Rheum* 2010;**39**(6):448-53.
4. Thomas EN, Blotman F. Aerobic exercise in fibromyalgia: a practical review. *Rheumatol Int* 2010;**30**(9):1143-50.
5. Busch AJ, Webber SC, Brachaniec M, et al. Exercise therapy for fibromyalgia. *Curr Pain Headache Rep* 2011;**15**(5):358-67.
6. Kelley GA, Kelley KS, Hootman JM, et al. Exercise and global well-being in community-dwelling adults with fibromyalgia: a systematic review with meta-analysis. *BMC Public Health* 2010;**10**:198.
7. Hauser W, Klose P, Langhorst J, et al. Efficacy of different types of aerobic exercise in fibromyalgia syndrome: a systematic review and meta-analysis of randomised controlled trials. *Arthritis Res Ther* 2010;**12**(3):R79.
8. Brosseau L, Wells GA, Tugwell P, et al. Ottawa Panel evidence-based clinical practice guidelines for aerobic fitness exercises in the management of fibromyalgia: part 1. *Phys Ther* 2008;**88**(7):857-71.
9. Blair SN. Physical inactivity: the biggest public health problem of the 21st century. *Br J Sports Med* 2009;**43**(1):1-2.
10. Matthews CE, George SM, Moore SC, et al. Amount of time spent in sedentary behaviors and cause-specific mortality in US adults. *Am J Clin Nutr* 2012;**95**(2):437-45.

- 1  
2  
3 11. Thorp AA, Owen N, Neuhaus M, et al. Sedentary behaviors and subsequent health  
4  
5 outcomes in adults a systematic review of longitudinal studies, 1996-2011. *Am J Prev*  
6  
7 *Med* 2011;**41**(2):207-15.  
8
- 9  
10 12. Kaleth AS, Ang DC, Chakr R, et al. Validity and reliability of community health activities  
11  
12 model program for seniors and short-form international physical activity questionnaire  
13  
14 as physical activity assessment tools in patients with fibromyalgia. *Disabil Rehabil*  
15  
16 2010;**32**(5):353-9.  
17
- 18  
19 13. McLoughlin MJ, Colbert LH, Stegner AJ, et al. Are women with fibromyalgia less  
20  
21 physically active than healthy women? *Med Sci Sports Exerc* 2011;**43**(5):905-12.  
22
- 23  
24 14. Munguia-Izquierdo D, Legaz-Arrese A, Mannerkorpi K. Transcultural adaptation and  
25  
26 psychometric properties of a Spanish-language version of physical activity  
27  
28 instruments for patients with fibromyalgia. *Arch Phys Med Rehabil* 2011;**92**(2):284-  
29  
30 94.  
31
- 32  
33 15. Mannerkorpi K, Hernelid C. Leisure Time Physical Activity Instrument and Physical  
34  
35 Activity at Home and Work Instrument. Development, face validity, construct validity  
36  
37 and test-retest reliability for subjects with fibromyalgia. *Disabil Rehabil*  
38  
39 2005;**27**(12):695-701.  
40
- 41  
42 16. Mork PJ, Vasseljen O, Nilsen TI. Association between physical exercise, body mass  
43  
44 index, and risk of fibromyalgia: longitudinal data from the Norwegian Nord-  
45  
46 Trondelag Health Study. *Arthritis Care Res (Hoboken)* 2010;**62**(5):611-7.  
47
- 48  
49 17. Carbonell-Baeza A, Ruiz JR, Aparicio VA, et al. Land- and water-based exercise  
50  
51 intervention in women with fibromyalgia: the al-Andalus physical activity randomised  
52  
53 control trial. *BMC Musculoskelet Disord* 2012;**13**(1):18.  
54  
55  
56  
57  
58  
59  
60

- 1  
2  
3 18. Wolfe F, Smythe HA, Yunus MB, et al. The American College of Rheumatology 1990  
4 Criteria for the Classification of Fibromyalgia. Report of the Multicenter Criteria  
5 Committee. *Arthritis Rheum* 1990;**33**(2):160-72.  
6  
7  
8  
9  
10 19. Cardinal BJ, Esters J, Cardinal MK. Evaluation of the revised physical activity readiness  
11 questionnaire in older adults. *Med Sci Sports Exerc* 1996;**28**(4):468-72.  
12  
13 20. Rodriguez FA. Spanish version of the Physical Activity Readiness Questionnaire (C-  
14 AAF/rPAR-Q)]. *Arch Med Deporte* 1996;**13**(51):63-68.  
15  
16  
17 21. Rivera J, Gonzalez T. The Fibromyalgia Impact Questionnaire: a validated Spanish  
18 version to assess the health status in women with fibromyalgia. *Clin Exp Rheumatol*  
19 2004;**22**(5):554-60.  
20  
21  
22 22. Burckhardt CS, Clark SR, Bennett RM. The fibromyalgia impact questionnaire:  
23 development and validation. *J Rheumatol* 1991;**18**(5):728-33.  
24  
25  
26 23. von Elm E, Altman DG, Egger M, et al. The Strengthening the Reporting of Observational  
27 Studies in Epidemiology (STROBE) statement: guidelines for reporting observational  
28 studies. *Ann Intern Med* 2007;**147**(8):573-7.  
29  
30  
31 24. Matthews CE, Chen KY, Freedson PS, et al. Amount of time spent in sedentary behaviors  
32 in the United States, 2003-2004. *Am J Epidemiol* 2008;**167**(7):875-81.  
33  
34  
35 25. Hagstromer M, Oja P, Sjostrom M. Physical activity and inactivity in an adult population  
36 assessed by accelerometry. *Med Sci Sports Exerc* 2007;**39**(9):1502-8.  
37  
38  
39 26. Freedson PS, Melanson E, Sirard J. Calibration of the Computer Science and  
40 Applications, Inc. accelerometer. *Med Sci Sports Exerc* 1998;**30**(5):777-81.  
41  
42  
43 27. WHO. Global Recommendations on Physical Activity for Health. World Health Organ  
44 publications. Geneva, Switzerland. 2010.  
45  
46  
47 28. U.S. DEPARTMENT OF HEALTH AND HUMAN SERVICES. Physical Activity and  
48 Health: A Report of the Surgeon General. Atlanta.GA: U.S. Department of Health and  
49  
50  
51  
52  
53  
54  
55  
56  
57  
58  
59  
60



- Human Services, Centres for Disease Control and Prevention, National Centre for Chronic Disease Prevention and Health Promotion.  
(<http://www.cdc.gov/nccdphp/sgr/sgr.htm>, accessed 11 March 2008).
29. Bennett R. The Fibromyalgia Impact Questionnaire (FIQ): a review of its development, current version, operating characteristics and uses. *Clin Exp Rheumatol* 2005;**23**(5 Suppl 39):S154-62.
30. Bennett RM, Bushmakin AG, Cappelleri JC, et al. Minimal clinically important difference in the fibromyalgia impact questionnaire. *J Rheumatol* 2009;**36**(6):1304-11.
31. Aparicio VA, Ortega FB, Carbonell-Baeza A, et al. Are there gender differences in quality of life and fibromyalgia symptomatology? *Am J Mens Health* In press.
32. Miro E, Diener FN, Martinez MP, et al. [Fibromyalgia in men and women: comparison of the main clinical symptoms]. *Psicothema* 2012;**24**(1):10-5.
33. Fontaine KR, Conn L, Clauw DJ. Effects of lifestyle physical activity on perceived symptoms and physical function in adults with fibromyalgia: results of a randomized trial. *Arthritis Res Ther* 2010;**12**(2):R55.
34. Aparicio VA, Ortega FB, Carbonell-Baeza A, et al. Relationship of weight status with mental and physical health in female fibromyalgia patients. *Obes Facts* 2011;**4**(6):443-8.
35. Kop WJ, Lyden A, Berlin AA, et al. Ambulatory monitoring of physical activity and symptoms in fibromyalgia and chronic fatigue syndrome. *Arthritis Rheum* 2005;**52**(1):296-303.
36. Korszun A, Young EA, Engleberg NC, et al. Use of actigraphy for monitoring sleep and activity levels in patients with fibromyalgia and depression. *J Psychosom Res* 2002;**52**(6):439-43.

- 1  
2  
3 37. Ellingson LD, Shields MR, Stegner AJ, et al. Physical activity, sustained sedentary  
4  
5 behavior, and pain modulation in women with fibromyalgia. *J Pain* 2012;**13**(2):195-  
6  
7 206.  
8  
9  
10 38. Kashikar-Zuck S, Flowers SR, Verkamp E, et al. Actigraphy-based physical activity  
11  
12 monitoring in adolescents with juvenile primary fibromyalgia syndrome. *J Pain*  
13  
14 2010;**11**(9):885-93.  
15  
16 39. Troiano RP, Berrigan D, Dodd KW, et al. Physical activity in the United States measured  
17  
18 by accelerometer. *Med Sci Sports Exerc* 2008;**40**(1):181-8.  
19  
20  
21 40. Pate RR, O'Neill JR, Lobelo F. The evolving definition of "sedentary". *Exerc Sport Sci*  
22  
23 *Rev* 2008;**36**(4):173-8.  
24  
25 41. Cooper AR, Page A, Fox KR, et al. Physical activity patterns in normal, overweight and  
26  
27 obese individuals using minute-by-minute accelerometry. *Eur J Clin Nutr*  
28  
29 2000;**54**(12):887-94.  
30  
31  
32  
33  
34  
35  
36  
37  
38  
39  
40  
41  
42  
43  
44  
45  
46  
47  
48  
49  
50  
51  
52  
53  
54  
55  
56  
57  
58  
59  
60

**Table 1.** Physical activity levels in women with fibromyalgia, by age group, body mass index, waist circumference and percentage body fat category, years since clinical diagnosis, fibromyalgia impact, marital status, educational level and occupational status<sup>a</sup>.

|                                                            | Sedentary (hours/day) |      |          | Average PA (counts/minutes) |         |      | Moderate PA (min/day) |      |        | MVPA (min/day) |        |  |
|------------------------------------------------------------|-----------------------|------|----------|-----------------------------|---------|------|-----------------------|------|--------|----------------|--------|--|
|                                                            | N                     | Mean | 95% CI   | Mean                        | 95% CI  | Mean | 95% CI                | Mean | 95% CI | Mean           | 95% CI |  |
| Age groups (years)                                         |                       |      |          |                             |         |      |                       |      |        |                |        |  |
| 18-50                                                      | 41                    | 10.0 | 9.6 10.5 | 222                         | 196 248 | 51   | 43 59                 | 52   | 44 60  |                |        |  |
| 51-75                                                      | 52                    | 9.9  | 9.5 10.3 | 219                         | 195 242 | 50   | 43 58                 | 52   | 44 59  |                |        |  |
| P value                                                    |                       |      | 0.65     |                             | 0.86    |      | 0.96                  |      | 0.98   |                |        |  |
| Body mass index <sup>b</sup> category (kg/m <sup>2</sup> ) |                       |      |          |                             |         |      |                       |      |        |                |        |  |
| < 25                                                       | 29                    | 10.3 | 9.7 10.8 | 229                         | 199 260 | 56   | 47 65                 | 58   | 48 67  |                |        |  |
| 25-30                                                      | 34                    | 9.5  | 9.0 10.0 | 235                         | 207 263 | 53   | 44 61                 | 54   | 45 63  |                |        |  |
| > 30                                                       | 27                    | 10.1 | 9.6 10.7 | 195                         | 162 227 | 42   | 32 52                 | 43   | 33 54  |                |        |  |
| P for trend                                                |                       |      | 0.63     |                             | 0.14    |      | 0.056                 |      | 0.051  |                |        |  |
| Waist circumference category (cm)                          |                       |      |          |                             |         |      |                       |      |        |                |        |  |
| ≤80                                                        | 44                    | 10.2 | 9.7 10.6 | 233                         | 208 257 | 54   | 47 62                 | 56   | 48 64  |                |        |  |
| >80                                                        | 46                    | 9.7  | 9.3 10.2 | 209                         | 185 234 | 47   | 39 54                 | 48   | 40 56  |                |        |  |
| P value                                                    |                       |      | 0.157    |                             | 0.187   |      | 0.155                 |      | 0.139  |                |        |  |
| Body fat (%)                                               |                       |      |          |                             |         |      |                       |      |        |                |        |  |
| < 30                                                       | 13                    | 10.6 | 9.8 11.4 | 210                         | 164 256 | 48   | 34 63                 | 50   | 35 65  |                |        |  |
| ≥ 30                                                       | 76                    | 9.8  | 9.5 10.2 | 223                         | 204 242 | 51   | 45 57                 | 52   | 46 58  |                |        |  |
| P value                                                    |                       |      | 0.93     |                             | 0.605   |      | 0.709                 |      | 0.774  |                |        |  |
| Years since clinical diagnosis                             |                       |      |          |                             |         |      |                       |      |        |                |        |  |
| ≤ 5 years                                                  | 47                    | 9.9  | 9.5 10.3 | 224                         | 200 248 | 53   | 46 61                 | 54   | 47 62  |                |        |  |
| > 5 years                                                  | 45                    | 9.8  | 9.3 10.2 | 219                         | 194 244 | 49   | 41 56                 | 50   | 43 58  |                |        |  |
| P value                                                    |                       |      | 0.650    |                             | 0.765   |      | 0.420                 |      | 0.489  |                |        |  |
| Fibromyalgia severity (score) <sup>c</sup>                 |                       |      |          |                             |         |      |                       |      |        |                |        |  |
| < 70                                                       | 42                    | 9.9  | 9.4 10.3 | 226                         | 200 251 | 51   | 43 60                 | 53   | 45 61  |                |        |  |
| ≥ 70                                                       | 50                    | 10.0 | 9.6 10.5 | 215                         | 191 238 | 49   | 42 57                 | 50   | 43 58  |                |        |  |
| P value                                                    |                       |      | 0.632    |                             | 0.546   |      | 0.725                 |      | 0.636  |                |        |  |
| Marital status                                             |                       |      |          |                             |         |      |                       |      |        |                |        |  |

1  
2  
3  
4  
5  
6  
7  
8  
9  
10  
11  
12  
13  
14  
15  
16  
17  
18  
19  
20  
21  
22  
23  
24  
25  
26  
27  
28  
29  
30  
31  
32  
33  
34  
35  
36  
37  
38  
39  
40  
41  
42  
43  
44  
45  
46  
47  
48  
49

|                         |    |      |       |      |     |     |       |    |       |    |    |    |       |
|-------------------------|----|------|-------|------|-----|-----|-------|----|-------|----|----|----|-------|
| Married                 | 72 | 9.9  | 9.6   | 10.3 | 217 | 198 | 237   | 50 | 43    | 56 | 51 | 44 | 57    |
| Unmarried               | 22 | 10.0 | 9.4   | 10.7 | 229 | 194 | 264   | 54 | 43    | 65 | 56 | 44 | 67    |
| P value                 |    |      | 0.710 |      |     |     | 0.564 |    | 0.510 |    |    |    | 0.436 |
| Educational level       |    |      |       |      |     |     |       |    |       |    |    |    |       |
| Below university degree | 71 | 9.9  | 9.6   | 10.3 | 222 | 203 | 242   | 51 | 45    | 57 | 53 | 46 | 59    |
| University degree       | 22 | 10.2 | 9.5   | 10.8 | 218 | 182 | 253   | 50 | 39    | 61 | 51 | 40 | 63    |
| P value                 |    |      | 0.519 |      |     |     | 0.814 |    | 0.791 |    |    |    | 0.830 |
| Occupational status     |    |      |       |      |     |     |       |    |       |    |    |    |       |
| Working                 | 29 | 9.8  | 9.3   | 10.3 | 222 | 196 | 247   | 51 | 43    | 59 | 52 | 44 | 60    |
| Unemployed              | 41 | 10.1 | 9.6   | 10.7 | 236 | 205 | 266   | 55 | 45    | 64 | 57 | 47 | 66    |
| Retired                 | 24 | 10.0 | 9.3   | 10.6 | 197 | 163 | 232   | 45 | 34    | 56 | 46 | 35 | 57    |
| P for trend             |    |      | 0.619 |      |     |     | 0.107 |    | 0.187 |    |    |    | 0.159 |

Abbreviations: CI, confidence interval; PA, physical activity; MVPA, moderate- to vigorous-intensity physical activity.

<sup>a</sup> Estimates and P values were adjusted for registered time.

<sup>b</sup> Weight (kg)/height (m)<sup>2</sup>.

<sup>c</sup> Assessed with the Fibromyalgia Impact Questionnaire.

Analyses were conducted with physical activity and sedentary outcome variables logarithmically transformed to obtain a normal distribution, yet crude values are presented in the table for easier interpretation.

**Table 2.** Prevalence of meeting the physical activity recommendations (30 min/day of at least moderate intensity physical activity) on at least 5 days a week.

|                                               | N  | %    | 95%CI |       | Frequency |
|-----------------------------------------------|----|------|-------|-------|-----------|
| Age groups (years)                            |    |      |       |       |           |
| 18-50                                         | 41 | 68.3 | 51.9% | 81.9% | 28        |
| 51-75                                         | 52 | 53.8 | 39.5% | 67.8% | 28        |
| Body mass index category (kg/m <sup>2</sup> ) |    |      |       |       |           |
| < 25                                          | 29 | 65.5 | 45.7% | 82.1% | 19        |
| 25-30                                         | 34 | 67.6 | 49.5% | 82.6% | 23        |
| > 30                                          | 27 | 48.1 | 28.7% | 68.1% | 13        |
| Waist circumference category (cm)             |    |      |       |       |           |
| ≤80                                           | 44 | 68.2 | 52.4% | 81.4% | 30        |
| >80                                           | 46 | 54.3 | 39.0% | 69.1% | 25        |
| Body fat (%)                                  |    |      |       |       |           |
| < 30                                          | 13 | 61.5 | 31.6% | 86.1% | 8         |
| ≥ 30                                          | 76 | 61.8 | 50.0% | 72.8% | 47        |
| Years since clinical diagnosis                |    |      |       |       |           |
| ≤ 5 years                                     | 47 | 70.2 | 55.1% | 82.7% | 33        |
| > 5 years                                     | 45 | 53.3 | 37.9% | 68.3% | 24        |
| Fibromyalgia severity                         |    |      |       |       |           |
| < 70                                          | 42 | 66.7 | 50.5% | 80.4% | 28        |
| ≥ 70                                          | 50 | 58   | 43.2% | 71.8% | 29        |
| Marital status                                |    |      |       |       |           |
| Married                                       | 72 | 61.1 | 48.9% | 72.4% | 44        |
| Unmarried                                     | 22 | 59.1 | 36.4% | 79.3% | 13        |
| Educational level                             |    |      |       |       |           |
| Below university degree                       | 71 | 62.0 | 49.7% | 73.2% | 44        |
| University degree                             | 22 | 59.1 | 0.0%  | 0.0%  | 13        |
| Occupational status                           |    |      |       |       |           |
| Working                                       | 29 | 62.1 | 42.3% | 79.3% | 18        |
| Unemployed                                    | 41 | 68.3 | 51.9% | 81.9% | 28        |
| Retired                                       | 24 | 45.8 | 25.6% | 67.2% | 11        |
| All                                           | 94 | 60.6 | 52.5% | 73.2% | 57        |

Abbreviations: CI, confidence interval.

<sup>a</sup> Assessed with the Fibromyalgia Impact Questionnaire.

**Table 3.** Odds ratio (OR) and 95% confidence interval (CI) of meeting the physical activity recommendations (30 min/day of at least moderate intensity, 5 of 7 days) by age group, body mass index, waist circumference and percentage body fat category, years since clinical diagnosis, marital status, educational level and occupational status.

|                                               | OR    | 95% CI |       | P value |
|-----------------------------------------------|-------|--------|-------|---------|
| Age groups (years)                            |       |        |       |         |
| 18-50                                         | Ref.  |        |       |         |
| 51-75                                         | 0.542 | 0.231  | 1.273 | 0.160   |
| Body mass index category (kg/m <sup>2</sup> ) |       |        |       |         |
| > 30                                          | Ref.  |        |       |         |
| 25-30                                         | 2.252 | 0.794  | 6.385 | 0.127   |
| < 25                                          | 2.046 | 0.698  | 5.997 | 0.192   |
| Waist circumference category (cm)             |       |        |       |         |
| ≤80                                           | Ref.  |        |       |         |
| >80                                           | 0.556 | 0.235  | 1.312 | 0.180   |
| Body fat category (%)                         |       |        |       |         |
| < 30                                          | Ref.  |        |       |         |
| ≥ 30                                          | 0.987 | 0.297  | 3.309 | 0.983   |
| Years since clinical diagnosis                |       |        |       |         |
| ≤ 5 years                                     | Ref.  |        |       |         |
| > 5 years                                     | 0.485 | 0.206  | 1.142 | 0.098   |
| Fibromyalgia severity (score) <sup>a</sup>    |       |        |       |         |
| < 70                                          | Ref.  |        |       |         |
| ≥ 70                                          | 0.690 | 0.294  | 1.620 | 0.395   |
| Marital status                                |       |        |       |         |
| Married                                       | Ref.  |        |       |         |
| Unmarried                                     | 0.919 | 0.347  | 2.432 | 0.865   |
| Educational level                             |       |        |       |         |
| Below university degree                       | Ref.  |        |       |         |
| University degree                             | 0.886 | 0.334  | 2.351 | 0.809   |
| Occupational status                           |       |        |       |         |
| Retired                                       | Ref.  |        |       |         |
| Unemployed                                    | 2.545 | 0.902  | 7.187 | 0.078   |
| Working                                       | 1.934 | 0.645  | 5.803 | 0.239   |

Abbreviations: Ref., Reference group.

<sup>a</sup> Assessed with the Fibromyalgia Impact Questionnaire.

**Table 4.** Sedentary time and physical activity levels during week time (Monday to Friday) and during weekend time (Saturday and Sunday) in women with fibromyalgia.

|                         | Week  |      | Weekend |      | Difference |          |         |
|-------------------------|-------|------|---------|------|------------|----------|---------|
|                         | mean  | sd   | mean    | sd   | mean       | 95% CI   | P value |
| Sedentary (hours/day)   | 10.0  | 2.2  | 9.6     | 2.5  | 0.4        | 0.0 0.8  | 0.051   |
| Average PA (counts/min) | 225.1 | 88.5 | 201.0   | 98.0 | 24.0       | 7.8 40.2 | 0.004   |
| Moderate PA (min/day)   | 53.1  | 28.4 | 42.6    | 28.0 | 10.5       | 5.5 15.5 | <0.001  |
| MVPA (min/day)          | 54.3  | 29.1 | 43.8    | 29.7 | 10.6       | 5.5 15.6 | <0.001  |

Abbreviations: CI, confidence interval; PA, physical activity; MVPA, moderate- to vigorous-intensity physical activity; sd, Standard deviation.

Analyses were conducted with physical activity and sedentary outcome variables logarithmically transformed to obtain a normal distribution, yet crude values are presented in the table for easier interpretation.

1  
2  
3  
4  
5  
6  
7  
8  
9  
10  
11  
12  
13  
14  
15  
16  
17  
18  
19  
20  
21  
22  
23  
24  
25  
26  
27  
28  
29  
30  
31  
32  
33  
34  
35  
36  
37  
38  
39  
40  
41  
42  
43  
44  
45  
46  
47  
48  
49  
50  
51  
52  
53  
54  
55  
56  
57  
58  
59  
60

**Figure legend**

**Figure 1.** Sedentary time and physical activity (PA) mean time by week and weekend days.

For peer review only



1  
2  
3  
4  
5  
6  
7  
8  
9  
10  
11  
12  
13  
14  
15  
16  
17  
18  
19  
20  
21  
22  
23  
24  
25  
26  
27  
28  
29  
30  
31  
32  
33  
34  
35  
36  
37  
38  
39  
40  
41  
42  
43  
44  
45  
46  
47  
48  
49  
50  
51  
52  
53  
54  
55  
56  
57  
58  
59  
60

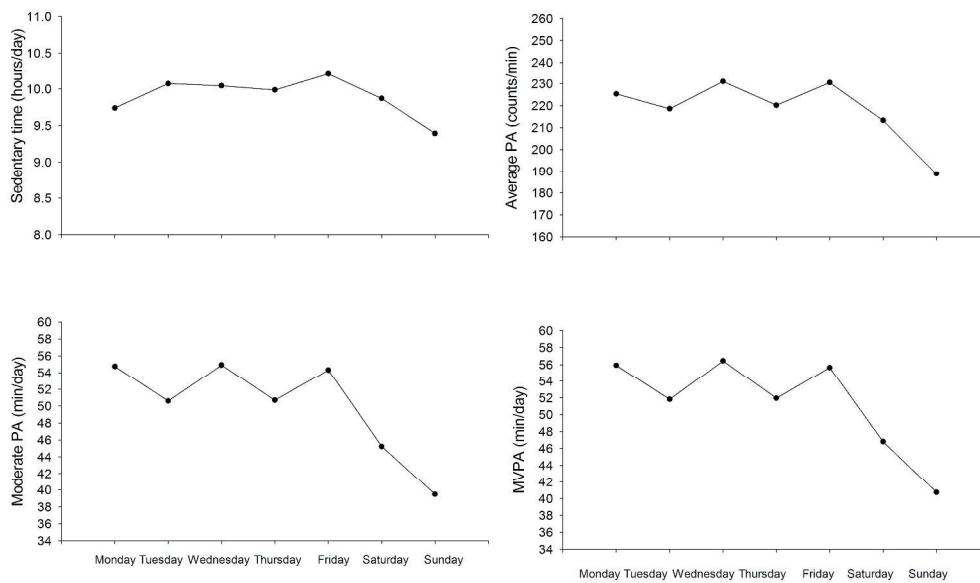

739x452mm (150 x 150 DPI)

Review only

STROBE 2007 (v4) checklist of items to be included in reports of observational studies in epidemiology\*  
Checklist for cohort, case-control, and cross-sectional studies (combined)

| Section/Topic             | Item # | Recommendation                                                                                                                                                                                                                                                                                                                                                                                                                                                         | Reported on page # |
|---------------------------|--------|------------------------------------------------------------------------------------------------------------------------------------------------------------------------------------------------------------------------------------------------------------------------------------------------------------------------------------------------------------------------------------------------------------------------------------------------------------------------|--------------------|
| Title and abstract        | 1      | (a) Indicate the study’s design with a commonly used term in the title or the abstract                                                                                                                                                                                                                                                                                                                                                                                 | 1                  |
|                           |        | (b) Provide in the abstract an informative and balanced summary of what was done and what was found                                                                                                                                                                                                                                                                                                                                                                    | 2                  |
| <b>Introduction</b>       |        |                                                                                                                                                                                                                                                                                                                                                                                                                                                                        |                    |
| Background/rationale      | 2      | Explain the scientific background and rationale for the investigation being reported                                                                                                                                                                                                                                                                                                                                                                                   | 3                  |
| Objectives                | 3      | State specific objectives, including any pre-specified hypotheses                                                                                                                                                                                                                                                                                                                                                                                                      | 4                  |
| <b>Methods</b>            |        |                                                                                                                                                                                                                                                                                                                                                                                                                                                                        |                    |
| Study design              | 4      | Present key elements of study design early in the paper                                                                                                                                                                                                                                                                                                                                                                                                                | 6                  |
| Setting                   | 5      | Describe the setting, locations, and relevant dates, including periods of recruitment, exposure, follow-up, and data collection                                                                                                                                                                                                                                                                                                                                        | 6                  |
| Participants              | 6      | (a) <i>Cohort study</i> —Give the eligibility criteria, and the sources and methods of selection of participants. Describe methods of follow-up<br><i>Case-control study</i> —Give the eligibility criteria, and the sources and methods of case ascertainment and control selection. Give the rationale for the choice of cases and controls<br><i>Cross-sectional study</i> —Give the eligibility criteria, and the sources and methods of selection of participants | 6                  |
|                           |        | (b) <i>Cohort study</i> —For matched studies, give matching criteria and number of exposed and unexposed<br><i>Case-control study</i> —For matched studies, give matching criteria and the number of controls per case                                                                                                                                                                                                                                                 | 6                  |
| Variables                 | 7      | Clearly define all outcomes, exposures, predictors, potential confounders, and effect modifiers. Give diagnostic criteria, if applicable                                                                                                                                                                                                                                                                                                                               | 6-9                |
| Data sources/ measurement | 8*     | For each variable of interest, give sources of data and details of methods of assessment (measurement). Describe comparability of assessment methods if there is more than one group                                                                                                                                                                                                                                                                                   | 6-9                |
| Bias                      | 9      | Describe any efforts to address potential sources of bias                                                                                                                                                                                                                                                                                                                                                                                                              | 6                  |
| Study size                | 10     | Explain how the study size was arrived at                                                                                                                                                                                                                                                                                                                                                                                                                              | 6                  |
| Quantitative variables    | 11     | Explain how quantitative variables were handled in the analyses. If applicable, describe which groupings were chosen and why                                                                                                                                                                                                                                                                                                                                           | 9                  |
| Statistical methods       | 12     | (a) Describe all statistical methods, including those used to control for confounding                                                                                                                                                                                                                                                                                                                                                                                  | 9                  |
|                           |        | (b) Describe any methods used to examine subgroups and interactions                                                                                                                                                                                                                                                                                                                                                                                                    | 9                  |
|                           |        | (c) Explain how missing data were addressed                                                                                                                                                                                                                                                                                                                                                                                                                            | 9                  |
|                           |        | (d) <i>Cohort study</i> —If applicable, explain how loss to follow-up was addressed<br><i>Case-control study</i> —If applicable, explain how matching of cases and controls was addressed                                                                                                                                                                                                                                                                              | 9                  |

|                          |     |                                                                                                                                                                                                                                                                                                                                                                                                               |       |
|--------------------------|-----|---------------------------------------------------------------------------------------------------------------------------------------------------------------------------------------------------------------------------------------------------------------------------------------------------------------------------------------------------------------------------------------------------------------|-------|
|                          |     | <i>Cross-sectional study</i> —If applicable, describe analytical methods taking account of sampling strategy                                                                                                                                                                                                                                                                                                  |       |
|                          |     | (e) Describe any sensitivity analyses                                                                                                                                                                                                                                                                                                                                                                         | 9     |
| <b>Results</b>           |     |                                                                                                                                                                                                                                                                                                                                                                                                               |       |
| Participants             | 13* | (a) Report numbers of individuals at each stage of study—eg numbers potentially eligible, examined for eligibility, confirmed eligible, included in the study, completing follow-up, and analysed<br>(b) Give reasons for non-participation at each stage<br>(c) Consider use of a flow diagram                                                                                                               | 10-11 |
| Descriptive data         | 14* | (a) Give characteristics of study participants (eg demographic, clinical, social) and information on exposures and potential confounders<br>(b) Indicate number of participants with missing data for each variable of interest<br>(c) <i>Cohort study</i> —Summarise follow-up time (eg, average and total amount)                                                                                           | 10-11 |
| Outcome data             | 15* | <i>Cohort study</i> —Report numbers of outcome events or summary measures over time<br><i>Case-control study</i> —Report numbers in each exposure category, or summary measures of exposure<br><i>Cross-sectional study</i> —Report numbers of outcome events or summary measures                                                                                                                             | 10-11 |
| Main results             | 16  | (a) Give unadjusted estimates and, if applicable, confounder-adjusted estimates and their precision (eg, 95% confidence interval). Make clear which confounders were adjusted for and why they were included<br>(b) Report category boundaries when continuous variables were categorized<br>(c) If relevant, consider translating estimates of relative risk into absolute risk for a meaningful time period |       |
| Other analyses           | 17  | Report other analyses done—eg analyses of subgroups and interactions, and sensitivity analyses                                                                                                                                                                                                                                                                                                                |       |
| <b>Discussion</b>        |     |                                                                                                                                                                                                                                                                                                                                                                                                               |       |
| Key results              | 18  | Summarise key results with reference to study objectives                                                                                                                                                                                                                                                                                                                                                      | 12    |
| Limitations              | 19  | Discuss limitations of the study, taking into account sources of potential bias or imprecision. Discuss both direction and magnitude of any potential bias                                                                                                                                                                                                                                                    | 15-16 |
| Interpretation           | 20  | Give a cautious overall interpretation of results considering objectives, limitations, multiplicity of analyses, results from similar studies, and other relevant evidence                                                                                                                                                                                                                                    | 15-16 |
| Generalisability         | 21  | Discuss the generalisability (external validity) of the study results                                                                                                                                                                                                                                                                                                                                         | 15-16 |
| <b>Other information</b> |     |                                                                                                                                                                                                                                                                                                                                                                                                               |       |
| Funding                  | 22  | Give the source of funding and the role of the funders for the present study and, if applicable, for the original study on which the present article is based                                                                                                                                                                                                                                                 | 17    |

\*Give information separately for cases and controls in case-control studies and, if applicable, for exposed and unexposed groups in cohort and cross-sectional studies.

**Note:** An Explanation and Elaboration article discusses each checklist item and gives methodological background and published examples of transparent reporting. The STROBE checklist is best used in conjunction with this article (freely available on the Web sites of PLoS Medicine at <http://www.plosmedicine.org/>, Annals of Internal Medicine at <http://www.annals.org/>, and Epidemiology at <http://www.epidem.com/>). Information on the STROBE Initiative is available at [www.strobe-statement.org](http://www.strobe-statement.org).



**Objectively measured sedentary time and physical activity  
in women with fibromyalgia**

|                                 |                                                                                                                                                                                                                                                                                                                                                                                                                                                                                                                                                                                                                                                  |
|---------------------------------|--------------------------------------------------------------------------------------------------------------------------------------------------------------------------------------------------------------------------------------------------------------------------------------------------------------------------------------------------------------------------------------------------------------------------------------------------------------------------------------------------------------------------------------------------------------------------------------------------------------------------------------------------|
| Journal:                        | <i>BMJ Open</i>                                                                                                                                                                                                                                                                                                                                                                                                                                                                                                                                                                                                                                  |
| Manuscript ID:                  | bmjopen-2013-002722.R1                                                                                                                                                                                                                                                                                                                                                                                                                                                                                                                                                                                                                           |
| Article Type:                   | Research                                                                                                                                                                                                                                                                                                                                                                                                                                                                                                                                                                                                                                         |
| Date Submitted by the Author:   | 28-Mar-2013                                                                                                                                                                                                                                                                                                                                                                                                                                                                                                                                                                                                                                      |
| Complete List of Authors:       | Ruiz, Jonatan; Karolinska Institutet, Department of Biosciences and Nutrition<br>Segura-Jiménez, Victor<br>Ortega, Francisco; University of Granada and Karolinska Institutet<br>Alvarez, Inmaculada; University of Granada, Physical Education and Sport<br>Camiletti, Daniel; University of Granada, Department of Physiology<br>Aparicio, Virginia<br>Carbonell-Baeza, Ana; University of Granada, 1. Department of Physical Education and Sport<br>Femia, Pedro; University of Granada, Department of Physiology<br>Munguia-Izquierdo, Diego<br>Delgado-Fernández, Manuel; University of Granada, Department of Physical Education and Sport |
| <b>Primary Subject Heading</b>: | Public health                                                                                                                                                                                                                                                                                                                                                                                                                                                                                                                                                                                                                                    |
| Secondary Subject Heading:      | Epidemiology, Rheumatology                                                                                                                                                                                                                                                                                                                                                                                                                                                                                                                                                                                                                       |
| Keywords:                       | EPIDEMIOLOGY, PREVENTIVE MEDICINE, PUBLIC HEALTH, RHEUMATOLOGY                                                                                                                                                                                                                                                                                                                                                                                                                                                                                                                                                                                   |
|                                 |                                                                                                                                                                                                                                                                                                                                                                                                                                                                                                                                                                                                                                                  |

SCHOLARONE™  
Manuscripts

1  
2  
3  
4  
5  
6  
7 **Objectively measured sedentary time and physical activity in women with fibromyalgia;**

8  
9 **A cross-sectional study**

10  
11  
12  
13  
14  
15  
16 Jonatan R Ruiz<sup>1\*</sup>, Víctor Segura-Jiménez<sup>2</sup>, Francisco B Ortega<sup>1</sup>, Inmaculada C Álvarez-  
17 Gallardo<sup>1</sup>, Daniel Camiletti-Moirón<sup>2,3</sup>, Virginia A Aparicio<sup>2,3</sup>, Ana Carbonell-Baeza<sup>2,4</sup>, Pedro  
18 Femia<sup>5</sup>, Diego Munguía-Izquierdo<sup>6</sup>, Manuel Delgado-Fernández<sup>2</sup>  
19  
20  
21  
22  
23  
24  
25  
26

27 <sup>1</sup> PROFITH “PROmoting FITness and Health through physical activity” research group,  
28 Department of Physical Education and Sports, Faculty of Sport Sciences, University of  
29 Granada, Spain.  
30  
31  
32

33  
34 <sup>2</sup>Department of Physical Education and Sport, School of Sport Sciences, University of  
35 Granada, Granada, Spain  
36  
37

38 <sup>3</sup>Department of Physiology, School of Pharmacy, University of Granada, Granada, Spain  
39

40 <sup>4</sup>Department of Physical Education, School of Education, University of Cadiz, Cadiz, Spain  
41  
42

43 <sup>5</sup>Department of Biostatistics, School of Medicine, University of Granada, Granada, Spain  
44

45 <sup>6</sup>Department of Sports and Informatics. Section of Physical education and Sports. Faculty of  
46 Sport. University Pablo de Olavide, Seville, Spain  
47  
48

49 **\*Address for correspondence:** Jonatan R. Ruiz, PhD. Department of Physical Education and  
50 Sport, School of Sport Sciences. University of Granada, Granada, Spain; [ruizj@ugr.es](mailto:ruizj@ugr.es)  
51  
52  
53  
54  
55  
56  
57  
58  
59  
60

## ARTICLE SUMMARY

### Article focus:

- To characterize the levels of objectively measured sedentary time and physical activity (using accelerometry) in women with fibromyalgia.
- To provide estimates of the adherence to recommended levels of physical activity assessed by accelerometry (30 minutes of moderate-to-vigorous-intensity physical activity on 5 of 7 days).

### Key Messages

- Over 60% of women with fibromyalgia meet the physical activity recommendations, that is, 30 min/day of moderate-to-vigorous-intensity physical activity on 5 or more days a week.
- These women spent about 71% (approximately 10 hours/day) of their waking time in activities that expend little energy.
- Women with fibromyalgia spent on average 10 min less of moderate-to-vigorous-intensity physical activity and 22 min less of sedentary behaviours during weekends compared with weekdays.

### Strengths and Limitations

- Strict standardization of the methodology used to measure physical activity and the fact that all women were compliant with the measurements procedures is a strength.
- All women had 7 valid days with at least 10 hours of registered time during waking hours.
- To avoid any kind of immediate reactivity, we removed from the analysis the first day of monitoring.

- The cross-sectional design of our study does not allow however establishing any causal relationships. The sample is of convenience, which includes the known limitations of all non-probability samples.
- The accelerometer underestimates physical activities that involve upper body movement, those with minimal vertical displacement such as cycling, water-based activities such as swimming. Moreover, it does not capture well the extra energy cost of load-bearing activities such as walking while carrying a backpack.

**ABSTRACT**

**Objectives:** To characterize levels of objectively measured sedentary time and physical activity in women with fibromyalgia.

**Design:** Cross-sectional study.

**Setting:** Local Association of Fibromyalgia (Granada, Spain).

**Participants:** The study comprised 94 women with diagnosed fibromyalgia who did not have other severe somatic or psychiatric disorders, or other diseases that prevent physical loading, able to ambulate and to communicate, and capable and willing to provide informed consent.

**Primary outcome measures:** Sedentary time and physical activity was measured by accelerometry and was expressed as time spent in sedentary behaviours, total physical activity (counts/minute) and amount of time (minutes/day) spent in moderate-intensity and in moderate-to vigorous-intensity physical activity (MVPA).

**Results:** The proportion of women meeting the physical activity recommendations of 30 min/day of MVPA on 5 or more days a week was 60.6%. Women spent on average 71% of their waking time (approximately 10 hours/day) in sedentary behaviours. Both sedentary behaviour and physical activity levels were similar across age groups, waist circumference and percentage body fat categories, years since clinical diagnosis, marital status, educational level, occupational status, as well as regardless the severity of the disease (all  $P > 0.1$ ). Time spent at moderate-intensity physical activity and MVPA was however lower in those with greater BMI (-6.6 min and -7 min respectively, per BMI category increase, <25, 25-30, >30 kg/m<sup>2</sup>; P values for trend were 0.056 and 0.051 respectively). Women spent on average 10 min less on MVPA ( $P < 0.001$ ) and 22 min less on sedentary behaviours during weekends compared with weekdays ( $P = 0.051$ ).

**Conclusions:** These data provide an objective measure of the amount of time spent in sedentary activities and in physical activity in women with fibromyalgia.



1  
2  
3  
4  
5  
6  
7  
8  
9  
10  
11  
12  
13  
14  
15  
16  
17  
18  
19  
20  
21  
22  
23  
24  
25  
26  
27  
28  
29  
30  
31  
32  
33  
34  
35  
36  
37  
38  
39  
40  
41  
42  
43  
44  
45  
46  
47  
48  
49  
50  
51  
52  
53  
54  
55  
56  
57  
58  
59  
60

Extra data is available by emailing [ruizj@ugr.es](mailto:ruizj@ugr.es)

For peer review only

## INTRODUCTION

Fibromyalgia is a pain regulation-related disorder <sup>1</sup>. Patients usually present an increased sensitivity to painful stimuli (hyperalgesia) and lowered pain threshold (allodynia). In addition to pain, fibromyalgia symptoms typically include severe fatigue, sleep disturbances, paresthesia of extremities, depression, anxiety, joint stiffness, and memory and cognitive difficulties <sup>1 2</sup>. Fibromyalgia is becoming a common syndrome in Western European countries, and estimates indicate a point prevalence of 2.9% which translates to approximately 6 million people with fibromyalgia <sup>3</sup>.

There is increasing evidence about the potential benefits of regular physical activity on fibromyalgia-related symptoms <sup>4-7</sup>, and International organizations supports the use of physical activity-based interventions as a complementary tool in the therapeutic armamentarium against fibromyalgia <sup>8</sup>. Physical inactivity is one of the major public health problems of the 21<sup>st</sup> century <sup>9</sup>, and several longitudinal studies showed the negative consequences for health of a sedentary lifestyle <sup>10 11</sup>.

The average amount of daily sedentary time as well as physical activity in women with fibromyalgia is rather unknown, and the available information is mainly questionnaire-based <sup>12-16</sup>. However, physical activities are difficult to recall, quantify and categorize <sup>17</sup>, and it might be even more complex in people with memory and cognitive difficulties such as fibromyalgia patients <sup>14</sup>. Given the limitations of self-report methods, accelerometry (i.e. movement sensors) has become the method of choice for objectively measuring physical activity in free-living conditions <sup>18</sup>. To have an objective diagnosis of the sedentary time as well as of the physical activity levels in patients with fibromyalgia is of public health and of clinical interest, and might be informative for developing intervention studies directed to the promotion of physical activity in women with fibromyalgia <sup>19</sup>.

1  
2  
3 The purpose of the present study was to characterize the levels of objectively  
4 measured (using accelerometry) sedentary time and physical activity among women with  
5 fibromyalgia, and to provide estimates of the adherence to recommended levels of physical  
6 activity [30 minutes of moderate-to-vigorous-intensity physical activity (MVPA) on 5 of 7  
7 days] <sup>20 21</sup> .  
8  
9  
10  
11  
12  
13  
14  
15  
16  
17  
18  
19  
20  
21  
22  
23  
24  
25  
26  
27  
28  
29  
30  
31  
32  
33  
34  
35  
36  
37  
38  
39  
40  
41  
42  
43  
44  
45  
46  
47  
48  
49  
50  
51  
52  
53  
54  
55  
56  
57  
58  
59  
60

For peer review only

## MATERIAL AND METHODS

### Study participants

We sent a formal invitation to participate in the study to all members (n=400) of a Local Association of Fibromyalgia (Granada, Spain). A total of 116 patients responded (response rate 29%), and gave their written informed consent after receiving detailed information about the aims and study procedures. Participants were included in the study if: (i) they met the diagnosis of fibromyalgia according to the American College of Rheumatology criteria<sup>22</sup> (widespread pain for more than 3 months, and pain with 4 kg/cm<sup>2</sup> of pressure reported for 11 or more of 18 tender points), (ii) did not have other severe somatic or psychiatric disorders, or other diseases that prevent physical loading (answer “no” to all questions on the Physical Activity Readiness Questionnaire-PAR-Q<sup>23 24</sup>), (iii) were able to ambulate and to communicate, (iv) and were capable and willing to provide informed consent. Men were not included in the study (n=6), and women with incomplete physical activity data (n=5) or technical errors in the instrument (n=11) were excluded. A final sample of 94 women with fibromyalgia participated in the study. Age, weight and height, and fibromyalgia severity (assessed by the fibromyalgia impact questionnaire, FIQ)<sup>25 26</sup> was similar between the included and excluded participants (all P>0.1). The study protocol was reviewed and approved by the Ethics Committee of the Hospital Virgen de las Nieves (Granada, Spain). The STROBE guidelines were followed during the course of the research<sup>27</sup>.

### Measurements

Women were interviewed in the Association of Fibromyalgia (Granada, Spain). They were asked to wear an accelerometer (Actigraph<sup>TM</sup> GT1M, Pensacola, FL, USA) for 9 consecutive days starting the same day they received the monitor. The accelerometer was carried over the whole day (24 hrs) except during water-based activities such as bathing or swimming.

1  
2  
3 Accelerometers were initialized as described by the manufacturer, and data were recorded in 5  
4  
5 seconds epochs. Women wore the device on the lower back, secured with an elastic belt,  
6  
7 underneath clothing, near to the center of gravity. The data were downloaded onto a computer  
8  
9 using the manufacturer software. Data reduction, cleaning and analyses were performed using  
10  
11 the MAHUFFE program (see [http://www.mrc-](http://www.mrc-epid.cam.ac.uk/Research/Programmes/Programme_5/InDepth/Programme%20Downloads.html)  
12  
13 [epid.cam.ac.uk/Research/Programmes/Programme\\_5/InDepth/Programme%20Downloads.](http://www.mrc-epid.cam.ac.uk/Research/Programmes/Programme_5/InDepth/Programme%20Downloads.html)  
14  
15 [html](http://www.mrc-epid.cam.ac.uk/Research/Programmes/Programme_5/InDepth/Programme%20Downloads.html)).  
16  
17

18 Monitor wearing time was calculated by subtracting the sleeping reported time  
19  
20 (recorded through a diary) from the total registered time for the entire day (i.e. 1440 minutes).  
21  
22 Bouts of 60 continuous minutes of 0 activity intensity counts were also excluded from the  
23  
24 analysis, considering these periods as non-wearing time<sup>28</sup>. There was no allowance for any  
25  
26 minute with counts between 0-100 in the non-wear periods. A recording of more than 20,000  
27  
28 counts per minute (cpm) was considered as a potential malfunction of the accelerometer and  
29  
30 the value was excluded from the analyses<sup>28 29</sup>. The first and last days of recording were not  
31  
32 included in the analysis. A total of 7 days (full week) of recording with a minimum of 10 or  
33  
34 more hours of registration per day was necessary to be included in the study analysis.  
35  
36  
37

38 Sedentary time was estimated as the amount of time accumulated below 100 cpm  
39  
40 during periods of wear time<sup>30</sup>. Time spent being sedentary was expressed as total duration  
41  
42 (hours/day). Physical activity levels were estimated as follows: (i) Total physical activity was  
43  
44 expressed as mean cpm, and is a measure of overall physical activity. We calculated mean  
45  
46 cpm as the sum of total counts per day divided by the number of minutes of wear time in that  
47  
48 day; finally calculating the average of all valid days (n=7). (ii) Time engaged in moderate  
49  
50 physical activity. We calculated the time engaged in moderate-intensity physical activity  
51  
52 based upon a standardized cut-off of 1952-5724 cpm<sup>29 31</sup>, where 1952 cpm corresponds to  
53  
54 walking at 4 km/hour<sup>31</sup>. (iii) We also calculated the time engaged in MVPA as the amount of  
55  
56  
57  
58  
59  
60

1  
2  
3 time accumulated  $\geq 1952$  cpm. Sedentary time, as well as the study physical activity variables  
4  
5 was calculated for weekdays and weekends. We calculated the proportion of women meeting  
6  
7 the physical activity recommendations, that is 30 minutes/day of MVPA at least 5 of 7 days<sup>20</sup>  
8  
9  
10<sup>21</sup>.

11  
12 Weight and height were measured following standard procedures with a scale (InBody  
13  
14 720, Biospace, Seoul, Korea) and a stadiometer (Seca 22, Hamburg, Germany) respectively,  
15  
16 and body mass index (BMI, weight in kg divided by height in m<sup>2</sup>) was calculated. Percentage  
17  
18 body fat was measured with bioelectrical impedance analysis (InBody R20; Biospace,  
19  
20 Gateshead, UK). Waist circumference was measured at the level of the umbilicus with an  
21  
22 anthropometric un-elastic tape (Harpenden anthropometric tape Holtain Ltd). Weight status  
23  
24 groups were based on standard clinical definitions for BMI (normal weight: 18.5-24.9 kg/m<sup>2</sup>,  
25  
26 overweight: 25.0-29.9 kg/m<sup>2</sup>, obese: 30.0 kg/m<sup>2</sup> or higher); percentage body fat (normal:  
27  
28 <30%; obese:  $\geq 30\%$ ); and waist circumference (normal:  $\leq 80.0$  cm; abdominal obesity: > 80  
29  
30 cm). One woman had a BMI below 18.5 kg/m<sup>2</sup> (18 kg/m<sup>2</sup>) and was included in the normal  
31  
32 weight group.  
33  
34  
35

36  
37 Fibromyalgia severity was assessed with the fibromyalgia impact questionnaire (FIQ)  
38  
39<sup>25 26</sup>. FIQ is composed of ten subscales: physical impairment, overall well-being, work missed,  
40  
41 job difficulty, pain, fatigue, morning tiredness, stiffness, anxiety and depression. The score of  
42  
43 each subscale was standardized from 0 to 10. We summed the score of all items, so that the  
44  
45 total score ranged from 0 to 100, with a higher score indicating greater severity. Women were  
46  
47 categorized into two groups based on the FIQ total score as FIQ <70 and FIQ  $\geq 70$ . These  
48  
49 thresholds corresponds with having moderate or severe fibromyalgia respectively<sup>32</sup>.  
50  
51  
52  
53

#### 54 **Statistical analysis**

55  
56  
57  
58  
59  
60

1  
2  
3 All statistical analyses were performed with PASW (Predictive Analytics SoftWare, v. 18.0  
4 SPSS Inc., Chicago, IL, USA), and the level of significance was set at  $\alpha = 0.05$ . Physical  
5 activity and sedentary outcome variables were logarithmically transformed to obtain a normal  
6 distribution.  
7  
8  
9

10  
11 We calculated the estimated means of sedentary time, total physical activity, moderate  
12 physical activity and MVPA by age group, BMI and waist circumference categories, years  
13 since clinical diagnosis, fibromyalgia severity, marital status, educational level and  
14 occupational status, after adjusting for registered time. Linear regression analysis was  
15 conducted to examine the association of sedentary time, total physical activity, moderate-  
16 intensity physical activity and MVPA (inserted as dependent variables) with age group, BMI,  
17 waist circumference and percentage body fat categories, years since clinical diagnosis,  
18 fibromyalgia severity and educational level (inserted as independent variables). Independent  
19 variables were inserted as ordinal variables. As marital status and occupational status  
20 categories were not ordinal variables, we conducted one-way analysis of covariance to  
21 determine mean differences in sedentary time and physical activity levels among marital  
22 status and occupational status categories. Separate analyses were conducted for each  
23 dependent and independent variable. Registered time was entered as confounder in all models.  
24 Mean differences of sedentary time, physical activity, moderate physical activity and MVPA  
25 levels on week days (Monday to Friday) vs. weekend (Saturday and Sunday) were estimated  
26 with one-way analysis of variance for repeated measures.  
27  
28  
29  
30  
31  
32  
33  
34  
35  
36  
37  
38  
39  
40  
41  
42  
43  
44  
45  
46

47 We analysed the association of meeting the physical activity recommendations ( $\geq 30$   
48 minutes/day of MVPA on 5 of 7 days a week) with age, waist circumference and percentage  
49 body fat, years since clinical diagnosis, fibromyalgia severity, marital status, educational level  
50 and using binary logistic regression analysis. Multinomial regression analysis was conducted  
51  
52  
53  
54  
55  
56  
57  
58  
59  
60

1  
2  
3 to examine the association of meeting the physical activity recommendations with BMI and  
4  
5 occupational status categories.  
6  
7  
8  
9  
10  
11  
12  
13  
14  
15  
16  
17  
18  
19  
20  
21  
22  
23  
24  
25  
26  
27  
28  
29  
30  
31  
32  
33  
34  
35  
36  
37  
38  
39  
40  
41  
42  
43  
44  
45  
46  
47  
48  
49  
50  
51  
52  
53  
54  
55  
56  
57  
58  
59  
60

For peer review only



## RESULTS

All participants had 7 valid days of registration. Mean registered time during waking time was 842±108 minutes/day (~14±1.8 hours). There was no significant association of sedentary time and physical activity with age group, waist circumference and percentage body fat categories, years since clinical diagnosis, fibromyalgia severity, marital status, educational level and occupational status (all  $P>0.1$ , Table 1). Levels of moderate-intensity physical activity and MVPA were lower in women with greater BMI ( $\hat{\beta} = -6.6\pm3.4$  and  $-7\pm3.6$  min respectively, per BMI category increase (i.e. 18.5-24.9 kg/m<sup>2</sup>, 25.0-29.9 kg/m<sup>2</sup>, and  $\geq 30.0$  kg/m<sup>2</sup>; P values for trend were 0.056 and 0.051 respectively, Table 1). Mean estimates of sedentary time and physical activity intensity levels were similar in women with FIQ <70 compared with those with FIQ  $\geq 70$  (all  $P>0.5$ , Table 1). For sensitivity analyses, we explored whether the association between physical activity intensity levels and FIQ differ when a different FIQ threshold (FIQ  $\geq 59$ )<sup>33</sup> was used, yet the findings persisted (data not shown).

The proportion of women meeting the physical activity recommendations by age group, BMI, waist circumference and percentage body fat categories, years since clinical diagnosis, fibromyalgia severity, marital status, educational level and occupational status are shown in Table 2. The proportion of women meeting the physical activity recommendations was 60.6% (n=57, 95%CI: 52.5-73.2%). The OR of meeting the physical activity recommendations were lower, yet not reaching statistical significance, in the oldest group (OR: 0.542, 95%CI: 0.231-1.237,  $P=0.160$ ), in those with a high waist circumference (OR: 0.556, 95%CI: 0.235-1.312,  $P=0.180$ ), and in those diagnosed with fibromyalgia more than 5 years ago (OR: 0.485, 95%CI: 0.206-1.142,  $P=0.098$ ) (Table 3). The OR of meeting the physical activity recommendations was higher, yet not reaching statistical significance, in non-overweight (BMI <25kg/m<sup>2</sup>) and in the overweight (BMI=25-30kg/m<sup>2</sup>) group compared with the obese peers (OR: 2.046, 95%CI: 0.698-5.997,  $P=0.192$ ; OR: 2.252, 95%CI: 0.794-

1  
2  
3 6.385, P=0.127) (Table 4). Unemployed women had also higher OR of meeting the  
4  
5 recommendations (OR: 2.545, 95%CI: 0.902-7.187, P=0.078). The OR of meeting the  
6  
7 physical activity recommendations was lower in women with FIQ  $\geq 70$  (OR: 0.690, 95%CI:  
8  
9 0.294-1.620, P=0.395). The findings persisted when another suggested FIQ threshold (>59 vs.  
10  
11  $\geq 59$ ) was used<sup>33</sup> (data not shown). Women spent on average 71% of their waking time  
12  
13 (approximately 10 hours/day) in sedentary behaviours. The results did not change after  
14  
15 adjusting for registered time (data not shown).  
16  
17

18  
19 Sedentary time and physical activity levels during weekdays (Monday to Friday) and  
20  
21 during weekend time (Saturday and Sunday) in women with fibromyalgia are shown in table  
22  
23 4. Mean levels of physical activity were lower during weekends compared with weekdays  
24  
25 (mean difference: 24 cpm, 95%CI: 7.8-40.2, P=0.004). Likewise, registered time at moderate-  
26  
27 intensity physical activity and MVPA was lower during weekends (mean difference: 10.5  
28  
29 min/day, 95%CI: 5.5-15.5, P<0.001; and 10.6 min/day, 95%CI: 5.5-15.6, P<0.001),  
30  
31 respectively). Mean levels of sedentary time were also lower during weekends (mean  
32  
33 difference: 22.6 min/day, 95%CI: 0-45.3, P=0.051). Figure 1 shows the sedentary time and  
34  
35 physical activity mean time by week and weekend days.  
36  
37  
38  
39  
40  
41  
42  
43  
44  
45  
46  
47  
48  
49  
50  
51  
52  
53  
54  
55  
56  
57  
58  
59  
60

## DISCUSSION

The main purpose of the present study was to characterize levels of sedentary time and physical activity in women with diagnosed fibromyalgia as well as to describe the adherence to recommended levels of physical activity assessed by accelerometry. Over half of the women (60.6%) met the physical activity recommendations (30 min/day of MVPA on 5 or more days a week). These women spent on average 71% (approximately 10 hours/day) of their waking time in sedentary behaviours, that is, in activities that expend little energy. We observed that both sedentary behaviour and physical activity levels were similar across the study demographic factors as well as regardless the severity of the disease. Women spent on average 10 min less on MVPA and 22 min less on sedentary behaviours during weekends compared with weekdays.

The present study showed that 60.6% of women met the recommendation to accumulate 30 or more min/day of physical activity of MVPA on most days of the week. The variation in meeting the recommendations was not associated with the study demographic factors, and despite the prevalence of meeting the recommendations tend to be lower in the oldest group, in the overweight group and in those with a higher waist circumference, in those with fibromyalgia being diagnosed more than 5 years ago, and in the retired group, the associations were not statistically significant. Time spent at moderate-intensity physical activity and MVPA tended to be however lower in those with greater BMI (-6.6 min and -7 min, respectively, per BMI category increase, <25, 25-30, >30 kg/m<sup>2</sup>), which concur with studies in healthy adults<sup>29</sup>. This may have important health implications since obese female fibromyalgia patients seem to have higher levels of pain, anxiety and depression and worse quality of life, as well as lower functional capacity than their normal weight peers<sup>34</sup>.

Despite several attempts have been made to objectively quantify sedentary behaviours and physical activity levels in people with fibromyalgia<sup>12 13 35-38</sup>, to our knowledge, there are

1  
2  
3 no previous studies showing the prevalence of meeting the physical activity recommendations  
4  
5 in women with fibromyalgia, which hamper between study comparisons. Mcloughlin et al.<sup>13</sup>  
6  
7 measured physical activity with accelerometry in 26 female fibromyalgia patients aged  
8  
9 42.7±12 years, yet they did not show the prevalence of meeting the recommendations. They  
10  
11 showed however that time spent at moderate intensity using the same intensity threshold as  
12  
13 used in the present study<sup>31</sup> was 15±8 minutes/day which is on average ~35 minutes lower  
14  
15 (using the 51-75 years age group as a reference group) than the time observed in the present  
16  
17 study. Kaleth et al.<sup>12</sup> also measured physical activity with accelerometry in 30 fibromyalgia  
18  
19 patients (27 women), but unfortunately, they did not show physical activity estimates.  
20  
21 Kashikar-Zuck et al.<sup>38</sup> measured physical activity with accelerometry in a juvenile primary  
22  
23 fibromyalgia syndrome group of adolescents and showed that only 23% achieved 30  
24  
25 minutes/day of MVPA, and that only 1 patient achieved the recommended levels of physical  
26  
27 activity for their age, that is 60 minutes/day of MVPA<sup>20 21</sup>. Data coming from apparently  
28  
29 healthy women showed lower rates of meeting the recommendation than those observed in  
30  
31 the present study. Hagströmer et al.<sup>29</sup> reported that 48% of a representative sample of  
32  
33 Swedish women accumulated 30 minutes/day of MVPA, whereas Troiano et al.<sup>28</sup> showed  
34  
35 that less than 5% of a representative sample of women from U.S (2003–2004 National Health  
36  
37 and Nutritional Examination Survey) met the physical activity recommendations.  
38  
39 Methodological procedures used to measure physical activity may partially explain these  
40  
41 differences. Several methodological differences can be noted between our study and the  
42  
43 American study: First, whereas in our study all women had 7 valid days with at least 10 hours  
44  
45 of registered time during waking hours, in the American study, only 26% of the total sample  
46  
47 (adolescent included) had 7 valid days. Of note is that the American study included  
48  
49 participants with just with one or more valid days when calculated population adherence  
50  
51 estimates; second, while we did not include in the analysis the first day of recording to avoid  
52  
53  
54  
55  
56  
57  
58  
59  
60

1  
2  
3 any source of reactivity, the American study included all measured days. Besides the  
4 mentioned methodological difference, it cannot be discarded that cultural differences might  
5 also explain the observed discrepancies between our study and the American study.  
6  
7  
8

9  
10 Sedentary behaviours refer to those activities that do not increase resting energy  
11 expenditure substantially, that is, no more than 1.5 times resting energy expenditure<sup>39</sup>. These  
12 activities involved sitting, reclining and lying down such as watching television, studying,  
13 reading, etc. In the present study we observed that women spend on average 10 hours/day  
14 (~71%) of their waking time in sedentary activities, which is similar to that observed in  
15 Portuguese women<sup>40</sup>, and slightly higher than American and Swedish women (about 7-8  
16 hours)<sup>29</sup>. McLoughlin et al.<sup>13</sup> also measured sedentary time with accelerometry, yet data are  
17 not comparable with our study because they included sleeping time as a sedentary activity.  
18 They reported that women with fibromyalgia spend 1,154±59 minutes/day at sedentary  
19 behaviours, which together with the registered time in other physical activity intensities  
20 summed ~1,440 min, which is a full day. We observed no association of sedentary time with  
21 any of the study demographic factors, which concur with the Swedish study by Hagströmer et  
22 al.<sup>29</sup>. Similarly, women with a higher severity of the disease (FIQ≥70) showed similar  
23 sedentary patterns as those with a FIQ<70, which concur with the findings reported by  
24 McLoughlin et al.<sup>13</sup>.  
25  
26  
27  
28  
29  
30  
31  
32  
33  
34  
35  
36  
37  
38  
39  
40  
41  
42

43 In our study, women with fibromyalgia spend less time (~10 minutes/day) on MVPA  
44 and on sedentary time (~22 minutes/day) during weekends compared with weekdays. These  
45 findings are in agreement with other study<sup>41</sup>. The observed physical activity reduction during  
46 weekends could be partially explained by a reduced transport-related physical activity when  
47 commuting to or from work, whereas the reduction of sedentary time could be due to a  
48 reduced work-related sitting time. More studies quantifying and characterizing physical  
49 activity and sedentary patterns during weekends and weekdays are needed.  
50  
51  
52  
53  
54  
55  
56  
57  
58  
59  
60

1  
2  
3 The present study has several limitations. The cross-sectional design of our study does  
4 not allow establishing any causal relationship. The sample is of convenience and includes the  
5 known limitations of all non-probability samples, including less representativeness and  
6 unknown levels of sampling error. Further studies involving randomly recruited patients with  
7 fibromyalgia are needed. Of note is also the relatively low response rate (29%). We cannot  
8 discard that women who accepted to participate in this study are those more aware of the  
9 importance of having an active lifestyle, which may have influenced the results. It should also  
10 be mentioned that the accelerometer underestimates physical activities that involve upper  
11 body movement, those with minimal vertical displacement such as cycling, water-based  
12 activities such as swimming, and it does not capture well the extra energy cost of load-bearing  
13 activities, such as walking while carrying a backpack. Nevertheless, walking is the most  
14 prevalent leisure-time physical activity among women with fibromyalgia<sup>15</sup>, and is likely the  
15 type of activity they do at work and for transportation. We used the same cut-points for all  
16 ages and BMI levels as suggested elsewhere<sup>29</sup>. Use of a single cut point for all ages and BMI  
17 levels may however lead to an underestimate of moderate-intensity activity for the older and  
18 heavier group by not accounting for the decline in exercise capacity with age and weight. We  
19 do not present data on vigorous physical activity because the time spent at this intensity  
20 ranged from 0 to 2 min (see table 1, subtract moderate intensity to MVPA). On average,  
21 ~98% of the time spend at MVPA is moderate-intensity physical activity. This is consistent  
22 with the available clinical knowledge on this population, and concur with data from  
23 apparently healthy women from Sweden<sup>29</sup>. The observed low levels of vigorous physical  
24 activity could also suggest that the cut point for this intensity was too high, thereby missing  
25 many minutes of activity in our population that should have been classified as vigorous  
26 physical activity. Unfortunately, we have no data on an age- and culturally-matched group of  
27 healthy women, so that direct comparison cannot be made. McLoughlin et al.<sup>13</sup> observed that

1  
2  
3 female fibromyalgia patients (n=26) were less active than a group of healthy women (n=26),  
4  
5 yet the healthy group was younger and had higher level of education than the patients group.  
6  
7 Despite the number of participants in the present study is relatively small, to date, this is the  
8  
9 largest series described in adults. We do not know whether these findings apply to men,  
10  
11 therefore, future studies should quantify both sedentary time and physical activity in this  
12  
13 group of patients. We <sup>42</sup> and others <sup>43</sup> observed gender differences in patients with  
14  
15 fibromyalgia, therefore studies focused on examining gender differences on sedentary time  
16  
17 and physical activity will provide further insights on whether preventive and interventions  
18  
19 strategies should be gender-specific.  
20  
21

22  
23 One of the strengths of the present study was however the strict standardization of  
24  
25 methodology used to measure physical activity, and the fact that all women were compliant  
26  
27 with the measurements procedures. All women had 7 valid days with at least 10 hours of  
28  
29 registered time during waking hours. Indeed, the mean daily accelerometer wear time was  
30  
31 14±1.8 hours/day. We do not know whether women modified their habitual sedentary  
32  
33 behavior or physical activity during the days they were monitored despite they were advised  
34  
35 to keep on with their normal life. To avoid any kind of immediate reactivity, we removed  
36  
37 from the analysis the first day of monitoring.  
38  
39

40  
41 Modifiable lifestyle factors, such as physical activity, may have a great potential as a  
42  
43 public health instrument to prevent and contribute to the treatment of fibromyalgia.  
44  
45 Longitudinal studies are also needed to further understand the predictive value of sedentary  
46  
47 behaviours and physical activity over the course of the disease, and whether preventive  
48  
49 strategies should start at the early stages of the disease development. To have an objective  
50  
51 estimate of the patient's sedentary behaviour as well as the engagement in physical activity  
52  
53 could be used as a potential tool to increase the effectiveness of treatment approaches as well  
54  
55 as to reduce disability and enhance quality of life in people with fibromyalgia. Indeed,  
56  
57

1  
2  
3 Fontaine et al.<sup>44</sup> observed that accumulating 30 minutes of moderate-intensity physical  
4  
5 activity throughout the day produces clinically relevant changes in perceived physical  
6  
7 function and pain in previously minimally active adults with fibromyalgia.  
8

9  
10 In summary, these data provide an objective measure of amount of time spent in  
11  
12 sedentary activities and in physical activity in women with fibromyalgia. These estimates can  
13  
14 be used for comparisons with other rheumatologic diseases, as baseline reference levels for  
15  
16 monitoring, and to assess the effectiveness of intervention strategies promoting physical  
17  
18 activity in women with fibromyalgia.  
19

### 20 21 22 **Acknowledgments**

23  
24 The authors gratefully acknowledge all women for their collaboration. We also acknowledge  
25  
26 the AGRAFIM (association of fibromyalgia from Granada, southern Spain) members  
27  
28 involved in the field work for their effort and great enthusiasm.  
29  
30  
31

### 32 33 **Funding**

34  
35 This study was supported by the Consejería de Turismo, Comercio y Deporte (CTCD-  
36  
37 201000019242-TRA), the Spanish Ministry of Science and Innovation (I+D+I DEP2010-  
38  
39 15639, grants: BES-2009-013442, BES-2011-047133, RYC-2010-05957, RYC-2011-09011),  
40  
41 the Spanish Ministry of Education (AP-2009-3173 and AP2010-0963), Granada Research of  
42  
43 Excellence Initiative on Biohealth (GREIB), Campus BioTic, University of Granada, Spain  
44  
45 and the European University of Madrid, Escuela de Estudios Universitarios Real Madrid  
46  
47 (2010/04RM).  
48  
49  
50  
51  
52  
53  
54  
55  
56  
57  
58  
59  
60



**Author contributions**

JRR: Conception and design of the study, data collection, statistical analysis and interpretation of data, drafting the article

VSJ: Data collection, interpretation of data, and revising the article critically for important intellectual content

FOP: Conception and design of the study, interpretation of data, and revising the article critically for important intellectual content

IAG: Data collection, interpretation of data, and revising the article critically for important intellectual content

DCM: Data collection, interpretation of data, and revising the article critically for important intellectual content

VAA: Conception and design of the study, data collection, interpretation of data, and revising the article critically for important intellectual content

ACB: Conception and design of the study, data collection, interpretation of data, and revising the article critically for important intellectual content

PF: Statistical analysis, interpretation of data, and revising the article critically for important intellectual content

DMI: Interpretation of data, and revising the article critically for important intellectual content

MDF: Conception and design of the study, data collection, interpretation of data, and revising the article critically for important intellectual content

## REFERENCES

1. Bennett RM. Clinical manifestations and diagnosis of fibromyalgia. *Rheum Dis Clin North Am* 2009;35(2):215-32.
2. Wilson HD, Robinson JP, Turk DC. Toward the identification of symptom patterns in people with fibromyalgia. *Arthritis Rheum* 2009;61(4):527-34.
3. Branco JC, Bannwarth B, Failde I, Abello Carbonell J, Blotman F, Spaeth M, et al. Prevalence of fibromyalgia: a survey in five European countries. *Semin Arthritis Rheum* 2010;39(6):448-53.
4. Thomas EN, Blotman F. Aerobic exercise in fibromyalgia: a practical review. *Rheumatol Int* 2010;30(9):1143-50.
5. Busch AJ, Webber SC, Brachaniec M, Bidonde J, Bello-Haas VD, Danyliw AD, et al. Exercise therapy for fibromyalgia. *Curr Pain Headache Rep* 2011;15(5):358-67.
6. Kelley GA, Kelley KS, Hootman JM, Jones DL. Exercise and global well-being in community-dwelling adults with fibromyalgia: a systematic review with meta-analysis. *BMC Public Health* 2010;10:198.
7. Hauser W, Klose P, Langhorst J, Moradi B, Steinbach M, Schiltenswolf M, et al. Efficacy of different types of aerobic exercise in fibromyalgia syndrome: a systematic review and meta-analysis of randomised controlled trials. *Arthritis Res Ther* 2010;12(3):R79.
8. Brosseau L, Wells GA, Tugwell P, Egan M, Wilson KG, Dubouloz CJ, et al. Ottawa Panel evidence-based clinical practice guidelines for aerobic fitness exercises in the management of fibromyalgia: part 1. *Phys Ther* 2008;88(7):857-71.
9. Blair SN. Physical inactivity: the biggest public health problem of the 21st century. *Br J Sports Med* 2009;43(1):1-2.

- 1  
2  
3 10. Matthews CE, George SM, Moore SC, Bowles HR, Blair A, Park Y, et al. Amount of time  
4  
5 spent in sedentary behaviors and cause-specific mortality in US adults. *Am J Clin Nutr*  
6  
7 2012;95(2):437-45.  
8
- 9  
10 11. Thorp AA, Owen N, Neuhaus M, Dunstan DW. Sedentary behaviors and subsequent  
11  
12 health outcomes in adults a systematic review of longitudinal studies, 1996-2011. *Am*  
13  
14 *J Prev Med* 2011;41(2):207-15.  
15
- 16 12. Kaleth AS, Ang DC, Chakr R, Tong Y. Validity and reliability of community health  
17  
18 activities model program for seniors and short-form international physical activity  
19  
20 questionnaire as physical activity assessment tools in patients with fibromyalgia.  
21  
22 *Disabil Rehabil* 2010;32(5):353-9.  
23
- 24 13. McLoughlin MJ, Colbert LH, Stegner AJ, Cook DB. Are women with fibromyalgia less  
25  
26 physically active than healthy women? *Med Sci Sports Exerc* 2011;43(5):905-12.  
27  
28
- 29 14. Munguia-Izquierdo D, Legaz-Arrese A, Mannerkorpi K. Transcultural adaptation and  
30  
31 psychometric properties of a Spanish-language version of physical activity  
32  
33 instruments for patients with fibromyalgia. *Arch Phys Med Rehabil* 2011;92(2):284-  
34  
35 94.  
36  
37
- 38 15. Mannerkorpi K, Hernelid C. Leisure Time Physical Activity Instrument and Physical  
39  
40 Activity at Home and Work Instrument. Development, face validity, construct validity  
41  
42 and test-retest reliability for subjects with fibromyalgia. *Disabil Rehabil*  
43  
44 2005;27(12):695-701.  
45  
46
- 47 16. Mork PJ, Vasseljen O, Nilsen TI. Association between physical exercise, body mass  
48  
49 index, and risk of fibromyalgia: longitudinal data from the Norwegian Nord-  
50  
51 Trondelag Health Study. *Arthritis Care Res (Hoboken)* 2010;62(5):611-7.  
52  
53  
54  
55  
56  
57  
58  
59  
60

- 1  
2  
3 17. van Poppel MN, Chinapaw MJ, Mokkink LB, van Mechelen W, Terwee CB. Physical  
4  
5 activity questionnaires for adults: a systematic review of measurement properties.  
6  
7 *Sports Med* 2010;40(7):565-600.  
8
- 9  
10 18. Freedson P, Bowles HR, Troiano R, Haskell W. Assessment of physical activity using  
11  
12 wearable monitors: recommendations for monitor calibration and use in the field. *Med*  
13  
14 *Sci Sports Exerc* 2012;44(1 Suppl 1):S1-4.  
15
- 16  
17 19. Carbonell-Baeza A, Ruiz JR, Aparicio VA, Ortega FB, Munguia-Izquierdo D, Alvarez-  
18  
19 Gallardo IC, et al. Land- and water-based exercise intervention in women with  
20  
21 fibromyalgia: the al-Andalus physical activity randomised control trial. *BMC*  
22  
23 *Musculoskelet Disord* 2012;13(1):18.  
24
- 25  
26 20. WHO. Global Recommendations on Physical Activity for Health. World Health Organ  
27  
28 publications. Geneva, Switzerland. 2010.
- 29  
30 21. U.S. DEPARTMENT OF HEALTH AND HUMAN SERVICES. Physical Activity and  
31  
32 Health: A Report of the Surgeon General. Atlanta, GA: U.S. Department of Health and  
33  
34 Human Services, Centres for Disease Control and Prevention, National Centre for  
35  
36 Chronic Disease Prevention and Health Promotion.  
37  
38 (<http://www.cdc.gov/nccdphp/sgr/sgr.htm>, accessed 11 March 2008).  
39
- 40  
41 22. Wolfe F, Smythe HA, Yunus MB, Bennett RM, Bombardier C, Goldenberg DL, et al. The  
42  
43 American College of Rheumatology 1990 Criteria for the Classification of  
44  
45 Fibromyalgia. Report of the Multicenter Criteria Committee. *Arthritis Rheum*  
46  
47 1990;33(2):160-72.  
48
- 49  
50 23. Cardinal BJ, Esters J, Cardinal MK. Evaluation of the revised physical activity readiness  
51  
52 questionnaire in older adults. *Med Sci Sports Exerc* 1996;28(4):468-72.  
53
- 54  
55 24. Rodriguez FA. Spanish version of the Physical Activity Readiness Questionnaire (C-  
56  
57 AAF/rPAR-Q)]. *Arch Med Deporte* 1996;13(51):63-68.  
58  
59  
60

- 1  
2  
3 25. Rivera J, Gonzalez T. The Fibromyalgia Impact Questionnaire: a validated Spanish  
4  
5 version to assess the health status in women with fibromyalgia. *Clin Exp Rheumatol*  
6  
7 2004;22(5):554-60.  
8  
9  
10 26. Burckhardt CS, Clark SR, Bennett RM. The fibromyalgia impact questionnaire:  
11  
12 development and validation. *J Rheumatol* 1991;18(5):728-33.  
13  
14 27. von Elm E, Altman DG, Egger M, Pocock SJ, Gotsche PC, Vandenbroucke JP. The  
15  
16 Strengthening the Reporting of Observational Studies in Epidemiology (STROBE)  
17  
18 statement: guidelines for reporting observational studies. *Ann Intern Med*  
19  
20 2007;147(8):573-7.  
21  
22  
23 28. Troiano RP, Berrigan D, Dodd KW, Masse LC, Tilert T, McDowell M. Physical activity  
24  
25 in the United States measured by accelerometer. *Med Sci Sports Exerc*  
26  
27 2008;40(1):181-8.  
28  
29  
30 29. Hagstromer M, Oja P, Sjostrom M. Physical activity and inactivity in an adult population  
31  
32 assessed by accelerometry. *Med Sci Sports Exerc* 2007;39(9):1502-8.  
33  
34 30. Matthews CE, Chen KY, Freedson PS, Buchowski MS, Beech BM, Pate RR, et al.  
35  
36 Amount of time spent in sedentary behaviors in the United States, 2003-2004. *Am J*  
37  
38 *Epidemiol* 2008;167(7):875-81.  
39  
40  
41 31. Freedson PS, Melanson E, Sirard J. Calibration of the Computer Science and  
42  
43 Applications, Inc. accelerometer. *Med Sci Sports Exerc* 1998;30(5):777-81.  
44  
45 32. Bennett R. The Fibromyalgia Impact Questionnaire (FIQ): a review of its development,  
46  
47 current version, operating characteristics and uses. *Clin Exp Rheumatol* 2005;23(5  
48  
49 Suppl 39):S154-62.  
50  
51  
52 33. Bennett RM, Bushmakina AG, Cappelleri JC, Zlateva G, Sadosky AB. Minimal clinically  
53  
54 important difference in the fibromyalgia impact questionnaire. *J Rheumatol*  
55  
56 2009;36(6):1304-11.  
57  
58  
59  
60

- 1  
2  
3 34. Aparicio VA, Ortega FB, Carbonell-Baeza A, Camiletti D, Ruiz JR, Delgado-Fernandez  
4  
5 M. Relationship of weight status with mental and physical health in female  
6  
7 fibromyalgia patients. *Obes Facts* 2011;4(6):443-8.  
8  
9  
10 35. Kop WJ, Lyden A, Berlin AA, Ambrose K, Olsen C, Gracely RH, et al. Ambulatory  
11  
12 monitoring of physical activity and symptoms in fibromyalgia and chronic fatigue  
13  
14 syndrome. *Arthritis Rheum* 2005;52(1):296-303.  
15  
16 36. Korszun A, Young EA, Engleberg NC, Brucksch CB, Greden JF, Crofford LA. Use of  
17  
18 actigraphy for monitoring sleep and activity levels in patients with fibromyalgia and  
19  
20 depression. *J Psychosom Res* 2002;52(6):439-43.  
21  
22 37. Ellingson LD, Shields MR, Stegner AJ, Cook DB. Physical activity, sustained sedentary  
23  
24 behavior, and pain modulation in women with fibromyalgia. *J Pain* 2012;13(2):195-  
25  
26 206.  
27  
28 38. Kashikar-Zuck S, Flowers SR, Verkamp E, Ting TV, Lynch-Jordan AM, Graham TB, et  
29  
30 al. Actigraphy-based physical activity monitoring in adolescents with juvenile primary  
31  
32 fibromyalgia syndrome. *J Pain* 2010;11(9):885-93.  
33  
34 39. Pate RR, O'Neill JR, Lobelo F. The evolving definition of "sedentary". *Exerc Sport Sci*  
35  
36  
37  
38  
39  
40  
41 40. Baptista F, Santos DA, Silva AM, Mota J, Santos R, Vale S, et al. Prevalence of the  
42  
43 Portuguese population attaining sufficient physical activity. *Med Sci Sports Exerc*  
44  
45 2012;44(3):466-73.  
46  
47 41. Cooper AR, Page A, Fox KR, Misson J. Physical activity patterns in normal, overweight  
48  
49 and obese individuals using minute-by-minute accelerometry. *Eur J Clin Nutr*  
50  
51 2000;54(12):887-94.  
52  
53  
54  
55  
56  
57  
58  
59  
60

- 1  
2  
3 42. Aparicio VA, Ortega FB, Carbonell-Baeza A, Tercedor P, Ruiz JR, Delgado-Fernandez  
4  
5 M. Are there gender differences in quality of life and fibromyalgia symptomatology?  
6  
7 *Am J Mens Health* In press.  
8  
9  
10 43. Miro E, Diener FN, Martinez MP, Sanchez AI, Valenza MC. [Fibromyalgia in men and  
11  
12 women: comparison of the main clinical symptoms]. *Psicothema* 2012;24(1):10-5.  
13  
14 44. Fontaine KR, Conn L, Clauw DJ. Effects of lifestyle physical activity on perceived  
15  
16 symptoms and physical function in adults with fibromyalgia: results of a randomized  
17  
18 trial. *Arthritis Res Ther* 2010;12(2):R55.  
19  
20  
21  
22  
23  
24  
25  
26  
27  
28  
29  
30  
31  
32  
33  
34  
35  
36  
37  
38  
39  
40  
41  
42  
43  
44  
45  
46  
47  
48  
49  
50  
51  
52  
53  
54  
55  
56  
57  
58  
59  
60

**Table 1.** Sedentary time and physical activity levels in women with fibromyalgia, by age group, body mass index, waist circumference and percentage body fat category, years since clinical diagnosis, fibromyalgia impact, marital status, educational level and occupational status<sup>a</sup>.

|                                                            | Sedentary (hours/day) |      |          | Total PA (counts/minutes) |         |      | Moderate PA (min/day) |      |        | MVPA (min/day) |        |  |
|------------------------------------------------------------|-----------------------|------|----------|---------------------------|---------|------|-----------------------|------|--------|----------------|--------|--|
|                                                            | N                     | Mean | 95% CI   | Mean                      | 95% CI  | Mean | 95% CI                | Mean | 95% CI | Mean           | 95% CI |  |
| Age groups (years)                                         |                       |      |          |                           |         |      |                       |      |        |                |        |  |
| 18-50                                                      | 41                    | 10.0 | 9.6 10.5 | 222                       | 196 248 | 51   | 43 59                 | 52   | 44 60  |                |        |  |
| 51-75                                                      | 52                    | 9.9  | 9.5 10.3 | 219                       | 195 242 | 50   | 43 58                 | 52   | 44 59  |                |        |  |
| P value                                                    |                       |      | 0.65     |                           | 0.86    |      | 0.96                  |      | 0.98   |                |        |  |
| Body mass index <sup>b</sup> category (kg/m <sup>2</sup> ) |                       |      |          |                           |         |      |                       |      |        |                |        |  |
| < 25                                                       | 29                    | 10.3 | 9.7 10.8 | 229                       | 199 260 | 56   | 47 65                 | 58   | 48 67  |                |        |  |
| 25-30                                                      | 34                    | 9.5  | 9.0 10.0 | 235                       | 207 263 | 53   | 44 61                 | 54   | 45 63  |                |        |  |
| > 30                                                       | 27                    | 10.1 | 9.6 10.7 | 195                       | 162 227 | 42   | 32 52                 | 43   | 33 54  |                |        |  |
| P for trend                                                |                       |      | 0.63     |                           | 0.14    |      | 0.056                 |      | 0.051  |                |        |  |
| Waist circumference category (cm)                          |                       |      |          |                           |         |      |                       |      |        |                |        |  |
| ≤80                                                        | 44                    | 10.2 | 9.7 10.6 | 233                       | 208 257 | 54   | 47 62                 | 56   | 48 64  |                |        |  |
| >80                                                        | 46                    | 9.7  | 9.3 10.2 | 209                       | 185 234 | 47   | 39 54                 | 48   | 40 56  |                |        |  |
| P value                                                    |                       |      | 0.157    |                           | 0.187   |      | 0.155                 |      | 0.139  |                |        |  |
| Body fat (%)                                               |                       |      |          |                           |         |      |                       |      |        |                |        |  |
| < 30                                                       | 13                    | 10.6 | 9.8 11.4 | 210                       | 164 256 | 48   | 34 63                 | 50   | 35 65  |                |        |  |
| ≥ 30                                                       | 76                    | 9.8  | 9.5 10.2 | 223                       | 204 242 | 51   | 45 57                 | 52   | 46 58  |                |        |  |
| P value                                                    |                       |      | 0.93     |                           | 0.605   |      | 0.709                 |      | 0.774  |                |        |  |
| Years since clinical diagnosis                             |                       |      |          |                           |         |      |                       |      |        |                |        |  |
| ≤ 5 years                                                  | 47                    | 9.9  | 9.5 10.3 | 224                       | 200 248 | 53   | 46 61                 | 54   | 47 62  |                |        |  |
| > 5 years                                                  | 45                    | 9.8  | 9.3 10.2 | 219                       | 194 244 | 49   | 41 56                 | 50   | 43 58  |                |        |  |
| P value                                                    |                       |      | 0.650    |                           | 0.765   |      | 0.420                 |      | 0.489  |                |        |  |
| Fibromyalgia severity (score) <sup>c</sup>                 |                       |      |          |                           |         |      |                       |      |        |                |        |  |
| < 70                                                       | 42                    | 9.9  | 9.4 10.3 | 226                       | 200 251 | 51   | 43 60                 | 53   | 45 61  |                |        |  |
| ≥ 70                                                       | 50                    | 10.0 | 9.6 10.5 | 215                       | 191 238 | 49   | 42 57                 | 50   | 43 58  |                |        |  |
| P value                                                    |                       |      | 0.632    |                           | 0.546   |      | 0.725                 |      | 0.636  |                |        |  |
| Marital status                                             |                       |      |          |                           |         |      |                       |      |        |                |        |  |



1  
2  
3  
4  
5  
6  
7  
8  
9  
10  
11  
12  
13  
14  
15  
16  
17  
18  
19  
20  
21  
22  
23  
24  
25  
26  
27  
28  
29  
30  
31  
32  
33  
34  
35  
36  
37  
38  
39  
40  
41  
42  
43  
44  
45  
46  
47  
48  
49

|                         |    |      |       |      |     |       |     |    |       |    |    |       |    |
|-------------------------|----|------|-------|------|-----|-------|-----|----|-------|----|----|-------|----|
| Married                 | 72 | 9.9  | 9.6   | 10.3 | 217 | 198   | 237 | 50 | 43    | 56 | 51 | 44    | 57 |
| Unmarried               | 22 | 10.0 | 9.4   | 10.7 | 229 | 194   | 264 | 54 | 43    | 65 | 56 | 44    | 67 |
| P value                 |    |      | 0.710 |      |     | 0.564 |     |    | 0.510 |    |    | 0.436 |    |
| Educational level       |    |      |       |      |     |       |     |    |       |    |    |       |    |
| Below university degree | 71 | 9.9  | 9.6   | 10.3 | 222 | 203   | 242 | 51 | 45    | 57 | 53 | 46    | 59 |
| University degree       | 22 | 10.2 | 9.5   | 10.8 | 218 | 182   | 253 | 50 | 39    | 61 | 51 | 40    | 63 |
| P value                 |    |      | 0.519 |      |     | 0.814 |     |    | 0.791 |    |    | 0.830 |    |
| Occupational status     |    |      |       |      |     |       |     |    |       |    |    |       |    |
| Working                 | 29 | 9.8  | 9.3   | 10.3 | 222 | 196   | 247 | 51 | 43    | 59 | 52 | 44    | 60 |
| Unemployed              | 41 | 10.1 | 9.6   | 10.7 | 236 | 205   | 266 | 55 | 45    | 64 | 57 | 47    | 66 |
| Retired                 | 24 | 10.0 | 9.3   | 10.6 | 197 | 163   | 232 | 45 | 34    | 56 | 46 | 35    | 57 |
| P value                 |    |      | 0.619 |      |     | 0.107 |     |    | 0.187 |    |    | 0.159 |    |

Abbreviations: CI, confidence interval; PA, physical activity; MVPA, moderate- to vigorous-intensity physical activity.

<sup>a</sup> Estimates and P values were adjusted for registered time.

<sup>b</sup> Weight (kg)/height (m)<sup>2</sup>.

<sup>c</sup> Assessed with the Fibromyalgia Impact Questionnaire.

Analyses were conducted with physical activity and sedentary outcome variables logarithmically transformed to obtain a normal distribution, yet crude values are presented in the table for easier interpretation.

**Table 2.** Prevalence of meeting the physical activity recommendations (30 min/day of moderate-to-vigorous-intensity physical activity) on at least 5 days a week.

|                                               | N  | %    | 95%CI |      | Frequency |
|-----------------------------------------------|----|------|-------|------|-----------|
| Age groups (years)                            |    |      |       |      |           |
| 18-50                                         | 41 | 68.3 | 51.9  | 81.9 | 28        |
| 51-75                                         | 52 | 53.8 | 39.5  | 67.8 | 28        |
| Body mass index category (kg/m <sup>2</sup> ) |    |      |       |      |           |
| < 25                                          | 29 | 65.5 | 45.7  | 82.1 | 19        |
| 25-30                                         | 34 | 67.6 | 49.5  | 82.6 | 23        |
| > 30                                          | 27 | 48.1 | 28.7  | 68.1 | 13        |
| Waist circumference category (cm)             |    |      |       |      |           |
| ≤80                                           | 44 | 68.2 | 52.4  | 81.4 | 30        |
| >80                                           | 46 | 54.3 | 39.0  | 69.1 | 25        |
| Body fat (%)                                  |    |      |       |      |           |
| < 30                                          | 13 | 61.5 | 31.6  | 86.1 | 8         |
| ≥ 30                                          | 76 | 61.8 | 50.0  | 72.8 | 47        |
| Years since clinical diagnosis                |    |      |       |      |           |
| ≤ 5 years                                     | 47 | 70.2 | 55.1  | 82.7 | 33        |
| > 5 years                                     | 45 | 53.3 | 37.9  | 68.3 | 24        |
| Fibromyalgia severity                         |    |      |       |      |           |
| < 70                                          | 42 | 66.7 | 50.5  | 80.4 | 28        |
| ≥ 70                                          | 50 | 58   | 43.2  | 71.8 | 29        |
| Marital status                                |    |      |       |      |           |
| Married                                       | 72 | 61.1 | 48.9  | 72.4 | 44        |
| Unmarried                                     | 22 | 59.1 | 36.4  | 79.3 | 13        |
| Educational level                             |    |      |       |      |           |
| Below university degree                       | 71 | 62.0 | 49.7  | 73.2 | 44        |
| University degree                             | 22 | 59.1 | 0.0   | 0.0  | 13        |
| Occupational status                           |    |      |       |      |           |
| Working                                       | 29 | 62.1 | 42.3  | 79.3 | 18        |
| Unemployed                                    | 41 | 68.3 | 51.9  | 81.9 | 28        |
| Retired                                       | 24 | 45.8 | 25.6  | 67.2 | 11        |
| All                                           | 94 | 60.6 | 52.5  | 73.2 | 57        |

Abbreviations: CI, confidence interval (expressed in %).

<sup>a</sup> Assessed with the Fibromyalgia Impact Questionnaire.

**Table 3.** Odds ratio (OR) and 95% confidence interval (CI) of meeting the physical activity recommendations (30 min/day of moderate-to-vigorous-intensity physical activity, 5 of 7 days) by age group, body mass index, waist circumference and percentage body fat category, years since clinical diagnosis, marital status, educational level and occupational status.

|                                               | OR    | 95% CI |       | P value |
|-----------------------------------------------|-------|--------|-------|---------|
| Age groups (years)                            |       |        |       |         |
| 18-50                                         | Ref.  |        |       |         |
| 51-75                                         | 0.542 | 0.231  | 1.273 | 0.160   |
| Body mass index category (kg/m <sup>2</sup> ) |       |        |       |         |
| > 30                                          | Ref.  |        |       |         |
| 25-30                                         | 2.252 | 0.794  | 6.385 | 0.127   |
| < 25                                          | 2.046 | 0.698  | 5.997 | 0.192   |
| Waist circumference category (cm)             |       |        |       |         |
| ≤80                                           | Ref.  |        |       |         |
| >80                                           | 0.556 | 0.235  | 1.312 | 0.180   |
| Body fat category (%)                         |       |        |       |         |
| < 30                                          | Ref.  |        |       |         |
| ≥ 30                                          | 0.987 | 0.297  | 3.309 | 0.983   |
| Years since clinical diagnosis                |       |        |       |         |
| ≤ 5 years                                     | Ref.  |        |       |         |
| > 5 years                                     | 0.485 | 0.206  | 1.142 | 0.098   |
| Fibromyalgia severity (score)*                |       |        |       |         |
| < 70                                          | Ref.  |        |       |         |
| ≥ 70                                          | 0.690 | 0.294  | 1.620 | 0.395   |
| Marital status                                |       |        |       |         |
| Married                                       | Ref.  |        |       |         |
| Unmarried                                     | 0.919 | 0.347  | 2.432 | 0.865   |
| Educational level                             |       |        |       |         |
| Below university degree                       | Ref.  |        |       |         |
| University degree                             | 0.886 | 0.334  | 2.351 | 0.809   |
| Occupational status                           |       |        |       |         |
| Retired                                       | Ref.  |        |       |         |
| Unemployed                                    | 2.545 | 0.902  | 7.187 | 0.078   |
| Working                                       | 1.934 | 0.645  | 5.803 | 0.239   |

Abbreviations: Ref., Reference group.

\* Assessed with the Fibromyalgia Impact Questionnaire.

**Table 4.** Sedentary time and physical activity levels during weekdays (Monday to Friday) and during weekends (Saturday and Sunday) in women with fibromyalgia.

|                       | Week  |      | Weekend |      | Difference |          |         |
|-----------------------|-------|------|---------|------|------------|----------|---------|
|                       | mean  | sd   | mean    | sd   | mean       | 95% CI   | P value |
| Sedentary (hours/day) | 10.0  | 2.2  | 9.6     | 2.5  | 0.4        | 0.0 0.8  | 0.051   |
| Total PA (counts/min) | 225.1 | 88.5 | 201.0   | 98.0 | 24.0       | 7.8 40.2 | 0.004   |
| Moderate PA (min/day) | 53.1  | 28.4 | 42.6    | 28.0 | 10.5       | 5.5 15.5 | <0.001  |
| MVPA (min/day)        | 54.3  | 29.1 | 43.8    | 29.7 | 10.6       | 5.5 15.6 | <0.001  |

Abbreviations: CI, confidence interval; PA, physical activity; MVPA, moderate-to-vigorous-intensity physical activity; sd, Standard deviation.

Analyses were conducted with physical activity and sedentary outcome variables logarithmically transformed to obtain a normal distribution, yet crude values are presented in the table for easier interpretation.

1  
2  
3  
4  
5  
6  
7  
8  
9  
10  
11  
12  
13  
14  
15  
16  
17  
18  
19  
20  
21  
22  
23  
24  
25  
26  
27  
28  
29  
30  
31  
32  
33  
34  
35  
36  
37  
38  
39  
40  
41  
42  
43  
44  
45  
46  
47  
48  
49  
50  
51  
52  
53  
54  
55  
56  
57  
58  
59  
60

**Figure legend**

**Figure 1.** Sedentary time and physical activity (PA) mean time by week and weekend days.

For peer review only

1  
2  
3  
4  
5  
6  
7 **Objectively measured sedentary time and physical activity in women with fibromyalgia;**

8  
9 **A cross-sectional study**

10  
11  
12  
13  
14  
15  
16 Jonatan R Ruiz<sup>1\*</sup>, Víctor Segura-Jiménez<sup>2</sup>, Francisco B Ortega<sup>1</sup>, Inmaculada C Álvarez-  
17 Gallardo<sup>1</sup>, Daniel Camiletti-Moirón<sup>2,3</sup>, Virginia A Aparicio<sup>2,3</sup>, Ana Carbonell-Baeza<sup>2,4</sup>, Pedro  
18 Femia<sup>5</sup>, Diego Munguía-Izquierdo<sup>6</sup>, Manuel Delgado-Fernández<sup>2</sup>

19  
20  
21  
22  
23  
24  
25  
26  
27 <sup>1</sup> PROFITH “PROmoting FITness and Health through physical activity” research group,  
28 Department of Physical Education and Sports, Faculty of Sport Sciences, University of  
29 Granada, Spain.

30  
31  
32  
33  
34 <sup>2</sup>Department of Physical Education and Sport, School of Sport Sciences, University of  
35 Granada, Granada, Spain

36  
37  
38 <sup>3</sup>Department of Physiology, School of Pharmacy, University of Granada, Granada, Spain

39  
40  
41 <sup>4</sup>Department of Physical Education, School of Education, University of Cadiz, Cadiz, Spain

42  
43  
44 <sup>5</sup>Department of Biostatistics, School of Medicine, University of Granada, Granada, Spain

45  
46  
47 <sup>6</sup>Department of Sports and Informatics. Section of Physical education and Sports. Faculty of  
48 Sport. University Pablo de Olavide, Seville, Spain

49  
50 **\*Address for correspondence:** Jonatan R. Ruiz, PhD. Department of Physical Education and  
51 Sport, School of Sport Sciences. University of Granada, Granada, Spain; [ruizj@ugr.es](mailto:ruizj@ugr.es)

## ARTICLE SUMMARY

### Article focus:

- To characterize the levels of objectively measured sedentary time and physical activity (using accelerometry) in women with fibromyalgia.
- To provide estimates of the adherence to recommended levels of physical activity assessed by accelerometry (30 minutes of moderate-to-vigorous-intensity physical activity on 5 of 7 days).

### Key Messages

- Over 60% of women with fibromyalgia meet the physical activity recommendations, that is, 30 min/day of moderate-to-vigorous-intensity physical activity on 5 or more days a week.
- These women spent about 71% (approximately 10 hours/day) of their waking time in activities that expend little energy.
- Women with fibromyalgia spent on average 10 min less of moderate-to-vigorous-intensity physical activity and 22 min less of sedentary behaviours during weekends compared with weekdays.

### Strengths and Limitations

- Strict standardization of the methodology used to measure physical activity and the fact that all women were compliant with the measurements procedures is a strength.
- All women had 7 valid days with at least 10 hours of registered time during waking hours.
- To avoid any kind of immediate reactivity, we removed from the analysis the first day of monitoring.

- 1  
2  
3  
4  
5  
6  
7  
8  
9  
10  
11  
12  
13  
14  
15  
16  
17  
18  
19  
20  
21  
22  
23  
24  
25  
26  
27  
28  
29  
30  
31  
32  
33  
34  
35  
36  
37  
38  
39  
40  
41  
42  
43  
44  
45  
46  
47  
48  
49  
50  
51  
52  
53  
54  
55  
56  
57  
58  
59  
60
- The cross-sectional design of our study does not allow however establishing any causal relationships. The sample is of convenience, which includes the known limitations of all **non-probability samples**.
  - The accelerometer underestimates physical activities that involve upper body movement, those with minimal vertical displacement such as cycling, water-based activities such as swimming. Moreover, it does not capture well the extra energy cost of load-bearing activities such **as walking while carrying a backpack**.



**ABSTRACT**

**Objectives:** To characterize levels of objectively measured sedentary time and physical activity in women with fibromyalgia.

**Design:** Cross-sectional study.

**Setting:** Local Association of Fibromyalgia (Granada, Spain).

**Participants:** The study comprised 94 women with diagnosed fibromyalgia who did not have other severe somatic or psychiatric disorders, or other diseases that prevent physical loading, able to ambulate and to communicate, and capable and willing to provide informed consent.

**Primary outcome measures:** Sedentary time and physical activity was measured by accelerometry and was expressed as time spent in sedentary behaviours, total physical activity (counts/minute) and amount of time (minutes/day) spent in moderate-intensity and in moderate-to vigorous-intensity physical activity (MVPA).

**Results:** The proportion of women meeting the physical activity recommendations of 30 min/day of MVPA on 5 or more days a week was 60.6%. Women spent on average 71% of their waking time (approximately 10 hours/day) in sedentary behaviours. Both sedentary behaviour and physical activity levels were similar across age groups, waist circumference and percentage body fat categories, years since clinical diagnosis, marital status, educational level, occupational status, as well as regardless the severity of the disease (all  $P > 0.1$ ). Time spent at moderate-intensity physical activity and MVPA was however lower in those with greater BMI (-6.6 min and -7 min respectively, per BMI category increase, <25, 25-30, >30 kg/m<sup>2</sup>; P values for trend were 0.056 and 0.051 respectively). Women spent on average 10 min less on MVPA ( $P < 0.001$ ) and 22 min less on sedentary behaviours during weekends compared with weekdays ( $P = 0.051$ ).

**Conclusions:** These data provide an objective measure of the amount of time spent in sedentary activities and in physical activity in women with fibromyalgia.

1  
2  
3 Extra data is available by emailing [ruizj@ugr.es](mailto:ruizj@ugr.es)  
4  
5  
6  
7  
8  
9  
10  
11  
12  
13  
14  
15  
16  
17  
18  
19  
20  
21  
22  
23  
24  
25  
26  
27  
28  
29  
30  
31  
32  
33  
34  
35  
36  
37  
38  
39  
40  
41  
42  
43  
44  
45  
46  
47  
48  
49  
50  
51  
52  
53  
54  
55  
56  
57  
58  
59  
60

For peer review only

## INTRODUCTION

Fibromyalgia is a pain regulation-related disorder <sup>1</sup>. Patients usually present an increased sensitivity to painful stimuli (hyperalgesia) and lowered pain threshold (allodynia). In addition to pain, fibromyalgia symptoms typically include severe fatigue, sleep disturbances, paresthesia of extremities, depression, anxiety, joint stiffness, and memory and cognitive difficulties <sup>1 2</sup>. Fibromyalgia is becoming a common syndrome in Western European countries, and estimates indicate a point prevalence of 2.9% which translates to approximately 6 million people with fibromyalgia <sup>3</sup>.

There is increasing evidence about the potential benefits of regular physical activity on fibromyalgia-related symptoms <sup>4-7</sup>, and International organizations supports the use of physical activity-based interventions as a complementary tool in the therapeutic armamentarium against fibromyalgia <sup>8</sup>. Physical inactivity is one of the major public health problems of the 21<sup>st</sup> century <sup>9</sup>, and several longitudinal studies showed the negative consequences for health of a sedentary lifestyle <sup>10 11</sup>.

The average amount of daily sedentary time as well as physical activity in women with fibromyalgia is rather unknown, and the available information is mainly questionnaire-based <sup>12-16</sup>. However, physical activities are difficult to recall, quantify and categorize <sup>17</sup>, and it might be even more complex in people with memory and cognitive difficulties such as fibromyalgia patients <sup>14</sup>. Given the limitations of self-report methods, accelerometry (i.e. movement sensors) has become the method of choice for objectively measuring physical activity in free-living conditions <sup>18</sup>. To have an objective diagnosis of the sedentary time as well as of the physical activity levels in patients with fibromyalgia is of public health and of clinical interest, and might be informative for developing intervention studies directed to the promotion of physical activity in women with fibromyalgia <sup>19</sup>.

1  
2  
3 The purpose of the present study was to characterize the levels of objectively  
4 measured (using accelerometry) sedentary time and physical activity among women with  
5 fibromyalgia, and to provide estimates of the adherence to recommended levels of physical  
6 activity [30 minutes of moderate-to-vigorous-intensity physical activity (MVPA) on 5 of 7  
7 days] <sup>20 21</sup> .  
8  
9  
10  
11  
12  
13  
14  
15  
16  
17  
18  
19  
20  
21  
22  
23  
24  
25  
26  
27  
28  
29  
30  
31  
32  
33  
34  
35  
36  
37  
38  
39  
40  
41  
42  
43  
44  
45  
46  
47  
48  
49  
50  
51  
52  
53  
54  
55  
56  
57  
58  
59  
60

For peer review only

## MATERIAL AND METHODS

### Study participants

We sent a formal invitation to participate in the study to all members (n=400) of a Local Association of Fibromyalgia (Granada, Spain). A total of 116 patients responded (response rate 29%), and gave their written informed consent after receiving detailed information about the aims and study procedures. Participants were included in the study if: (i) they met the diagnosis of fibromyalgia according to the American College of Rheumatology criteria<sup>22</sup> (widespread pain for more than 3 months, and pain with 4 kg/cm<sup>2</sup> of pressure reported for 11 or more of 18 tender points), (ii) did not have other severe somatic or psychiatric disorders, or other diseases that prevent physical loading (answer “no” to all questions on the Physical Activity Readiness Questionnaire-PAR-Q<sup>23 24</sup>, (iii) were able to ambulate and to communicate, (iv) and were capable and willing to provide informed consent. Men were not included in the study (n=6), and women with incomplete physical activity data (n=5) or technical errors in the instrument (n=11) were excluded. A final sample of 94 women with fibromyalgia participated in the study. Age, weight and height, and fibromyalgia severity (assessed by the fibromyalgia impact questionnaire, FIQ)<sup>25 26</sup> was similar between the included and excluded participants (all P>0.1). The study protocol was reviewed and approved by the Ethics Committee of the Hospital Virgen de las Nieves (Granada, Spain). The STROBE guidelines were followed during the course of the research<sup>27</sup>.

### Measurements

Women were interviewed in the Association of Fibromyalgia (Granada, Spain). They were asked to wear an accelerometer (Actigraph<sup>TM</sup> GT1M, Pensacola, FL, USA) for 9 consecutive days starting the same day they received the monitor. The accelerometer was carried over the whole day (24 hrs) except during water-based activities such as bathing or swimming.

1  
2  
3 Accelerometers were initialized as described by the manufacturer, and data were recorded in 5  
4 seconds epochs. Women wore the device on the lower back, secured with an elastic belt,  
5 underneath clothing, near to the center of gravity. The data were downloaded onto a computer  
6 using the manufacturer software. Data reduction, cleaning and analyses were performed using  
7 the MAHUFFe program (see [http://www.mrc-  
8 epid.cam.ac.uk/Research/Programmes/Programme\\_5/InDepth/Programme%205\\_Downloads.  
9 html](http://www.mrc-epid.cam.ac.uk/Research/Programmes/Programme_5/InDepth/Programme%205_Downloads.html)).

10  
11  
12  
13  
14  
15  
16  
17  
18  
19 Monitor wearing time was calculated by subtracting the sleeping reported time  
20 (recorded through a diary) from the total registered time for the entire day (i.e. 1440 minutes).  
21  
22 Bouts of 60 continuous minutes of 0 activity intensity counts were also excluded from the  
23 analysis, considering these periods as non-wearing time<sup>28</sup>. There was no allowance for any  
24 minute with counts between 0-100 in the non-wear periods. A recording of more than 20,000  
25 counts per minute (cpm) was considered as a potential malfunction of the accelerometer and  
26 the value was excluded from the analyses<sup>28 29</sup>. The first and last days of recording were not  
27 included in the analysis. A total of 7 days (full week) of recording with a minimum of 10 or  
28 more hours of registration per day was necessary to be included in the study analysis.  
29  
30  
31  
32  
33  
34  
35  
36  
37

38  
39  
40  
41  
42  
43  
44  
45  
46  
47  
48  
49  
50  
51  
52  
53  
54  
55  
56  
57  
58  
59  
60

Sedentary time was estimated as the amount of time accumulated below 100 cpm during periods of wear time<sup>30</sup>. Time spent being sedentary was expressed as total duration (hours/day). Physical activity levels were estimated as follows: (i) Total physical activity was expressed as mean cpm, and is a measure of overall physical activity. We calculated mean cpm as the sum of total counts per day divided by the number of minutes of wear time in that day; finally calculating the average of all valid days (n=7). (ii) Time engaged in moderate physical activity. We calculated the time engaged in moderate-intensity physical activity based upon a standardized cut-off of 1952-5724 cpm<sup>29 31</sup>, where 1952 cpm corresponds to walking at 4 km/hour<sup>31</sup>. (iii) We also calculated the time engaged in MVPA as the amount of

1  
2  
3 time accumulated  $\geq 1952$  cpm. Sedentary time, as well as the study physical activity variables  
4  
5 was calculated for weekdays and weekends. We calculated the proportion of women meeting  
6  
7 the physical activity recommendations, that is 30 minutes/day of MVPA at least 5 of 7 days<sup>20</sup>  
8  
9  
10<sup>21</sup>.

11  
12 Weight and height were measured following standard procedures with a scale (InBody  
13  
14 720, Biospace, Seoul, Korea) and a stadiometer (Seca 22, Hamburg, Germany) respectively,  
15  
16 and body mass index (BMI, weight in kg divided by height in m<sup>2</sup>) was calculated. Percentage  
17  
18 body fat was measured with bioelectrical impedance analysis (InBody R20; Biospace,  
19  
20 Gateshead, UK). Waist circumference was measured at the level of the umbilicus with an  
21  
22 anthropometric un-elastic tape (Harpenden anthropometric tape Holtain Ltd). Weight status  
23  
24 groups were based on standard clinical definitions for BMI (normal weight: 18.5-24.9 kg/m<sup>2</sup>,  
25  
26 overweight: 25.0-29.9 kg/m<sup>2</sup>, obese: 30.0 kg/m<sup>2</sup> or higher); percentage body fat (normal:  
27  
28 <30%; obese:  $\geq 30\%$ ); and waist circumference (normal:  $\leq 80.0$  cm; abdominal obesity: > 80  
29  
30 cm). One woman had a BMI below 18.5 kg/m<sup>2</sup> (18 kg/m<sup>2</sup>) and was included in the normal  
31  
32 weight group.  
33  
34  
35

36  
37 Fibromyalgia severity was assessed with the fibromyalgia impact questionnaire (FIQ)  
38  
39<sup>25 26</sup>. FIQ is composed of ten subscales: physical impairment, overall well-being, work missed,  
40  
41 job difficulty, pain, fatigue, morning tiredness, stiffness, anxiety and depression. The score of  
42  
43 each subscale was standardized from 0 to 10. We summed the score of all items, so that the  
44  
45 total score ranged from 0 to 100, with a higher score indicating greater severity. Women were  
46  
47 categorized into two groups based on the FIQ total score as FIQ <70 and FIQ  $\geq 70$ . These  
48  
49 thresholds corresponds with having moderate or severe fibromyalgia respectively<sup>32</sup>.  
50  
51  
52  
53

#### 54 **Statistical analysis**

55  
56  
57  
58  
59  
60

1  
2  
3 All statistical analyses were performed with PASW (Predictive Analytics SoftWare, v. 18.0  
4 SPSS Inc., Chicago, IL, USA), and the level of significance was set at  $\alpha = 0.05$ . Physical  
5 activity and sedentary outcome variables were logarithmically transformed to obtain a normal  
6 distribution.  
7  
8  
9

10  
11 We calculated the estimated means of sedentary time, total physical activity, moderate  
12 physical activity and MVPA by age group, BMI and waist circumference categories, years  
13 since clinical diagnosis, fibromyalgia severity, marital status, educational level and  
14 occupational status, after adjusting for registered time. Linear regression analysis was  
15 conducted to examine the association of sedentary time, total physical activity, moderate-  
16 intensity physical activity and MVPA (inserted as dependent variables) with age group, BMI,  
17 waist circumference and percentage body fat categories, years since clinical diagnosis,  
18 fibromyalgia severity and educational level (inserted as independent variables). Independent  
19 variables were inserted as ordinal variables. As marital status and occupational status  
20 categories were not ordinal variables, we conducted one-way analysis of covariance to  
21 determine mean differences in sedentary time and physical activity levels among marital  
22 status and occupational status categories. Separate analyses were conducted for each  
23 dependent and independent variable. Registered time was entered as confounder in all models.  
24 Mean differences of sedentary time, physical activity, moderate physical activity and MVPA  
25 levels on week days (Monday to Friday) vs. weekend (Saturday and Sunday) were estimated  
26 with one-way analysis of variance for repeated measures.  
27  
28  
29  
30  
31  
32  
33  
34  
35  
36  
37  
38  
39  
40  
41  
42  
43  
44  
45  
46

47 We analysed the association of meeting the physical activity recommendations ( $\geq 30$   
48 minutes/day of MVPA on 5 of 7 days a week) with age, waist circumference and percentage  
49 body fat, years since clinical diagnosis, fibromyalgia severity, marital status, educational level  
50 and using binary logistic regression analysis. Multinomial regression analysis was conducted  
51  
52  
53  
54  
55  
56  
57  
58  
59  
60



1  
2  
3  
4  
5  
6  
7  
8  
9  
10  
11  
12  
13  
14  
15  
16  
17  
18  
19  
20  
21  
22  
23  
24  
25  
26  
27  
28  
29  
30  
31  
32  
33  
34  
35  
36  
37  
38  
39  
40  
41  
42  
43  
44  
45  
46  
47  
48  
49  
50  
51  
52  
53  
54  
55  
56  
57  
58  
59  
60

to examine the association of meeting the physical activity recommendations with BMI and occupational status categories.

For peer review only

## RESULTS

All participants had 7 valid days of registration. Mean registered time during waking time was 842±108 minutes/day (~14±1.8 hours). There was no significant association of sedentary time and physical activity with age group, waist circumference and percentage body fat categories, years since clinical diagnosis, fibromyalgia severity, marital status, educational level and occupational status (all P>0.1, Table 1). Levels of moderate-intensity physical activity and MVPA were lower in women with greater BMI ( $\hat{\beta}$  = -6.6±3.4 and -7±3.6 min respectively, per BMI category increase (i.e. 18.5-24.9 kg/m<sup>2</sup>, 25.0-29.9 kg/m<sup>2</sup>, and ≥30.0 kg/m<sup>2</sup>; P values for trend were 0.056 and 0.051 respectively, Table 1). Mean estimates of sedentary time and physical activity intensity levels were similar in women with FIQ <70 compared with those with FIQ ≥70 (all P>0.5, Table 1). For sensitivity analyses, we explored whether the association between physical activity intensity levels and FIQ differ when a different FIQ threshold (FIQ ≥59)<sup>33</sup> was used, yet the findings persisted (data not shown).

The proportion of women meeting the physical activity recommendations by age group, BMI, waist circumference and percentage body fat categories, years since clinical diagnosis, fibromyalgia severity, marital status, educational level and occupational status are shown in Table 2. The proportion of women meeting the physical activity recommendations was 60.6% (n=57, 95%CI: 52.5-73.2%). The OR of meeting the physical activity recommendations were lower, yet not reaching statistical significance, in the oldest group (OR: 0.542, 95%CI: 0.231-1.237, P=0.160), in those with a high waist circumference (OR: 0.556, 95%CI: 0.235-1.312, P=0.180), and in those diagnosed with fibromyalgia more than 5 years ago (OR: 0.485, 95%CI: 0.206-1.142, P=0.098) (Table 3). The OR of meeting the physical activity recommendations was higher, yet not reaching statistical significance, in non-overweight (BMI <25kg/m<sup>2</sup>) and in the overweight (BMI=25-30kg/m<sup>2</sup>) group compared with the obese peers (OR: 2.046, 95%CI: 0.698-5.997, P=0.192; OR: 2.252, 95%CI: 0.794-

13

1  
2  
3 6.385, P=0.127) (Table 4). Unemployed women had also higher OR of meeting the  
4  
5 recommendations (OR: 2.545, 95%CI: 0.902-7.187, P=0.078). The OR of meeting the  
6  
7 physical activity recommendations was lower in women with FIQ  $\geq 70$  (OR: 0.690, 95%CI:  
8  
9 0.294-1.620, P=0.395). The findings persisted when another suggested FIQ threshold (>59 vs.  
10  
11  $\geq 59$ ) was used<sup>33</sup> (data not shown). Women spent on average 71% of their waking time  
12  
13 (approximately 10 hours/day) in sedentary behaviours. The results did not change after  
14  
15 adjusting for registered time (data not shown).  
16  
17

18  
19 Sedentary time and physical activity levels during weekdays (Monday to Friday) and  
20  
21 during weekend time (Saturday and Sunday) in women with fibromyalgia are shown in table  
22  
23 4. Mean levels of physical activity were lower during weekends compared with weekdays  
24  
25 (mean difference: 24 cpm, 95%CI: 7.8-40.2, P=0.004). Likewise, registered time at moderate-  
26  
27 intensity physical activity and MVPA was lower during weekends (mean difference: 10.5  
28  
29 min/day, 95%CI: 5.5-15.5, P<0.001; and 10.6 min/day, 95%CI: 5.5-15.6, P<0.001),  
30  
31 respectively). Mean levels of sedentary time were also lower during weekends (mean  
32  
33 difference: 22.6 min/day, 95%CI: 0-45.3, P=0.051). Figure 1 shows the sedentary time and  
34  
35 physical activity mean time by week and weekend days.  
36  
37  
38  
39  
40  
41  
42  
43  
44  
45  
46  
47  
48  
49  
50  
51  
52  
53  
54  
55  
56  
57  
58  
59  
60

## DISCUSSION

The main purpose of the present study was to characterize levels of sedentary time and physical activity in women with diagnosed fibromyalgia as well as to describe the adherence to recommended levels of physical activity assessed by accelerometry. Over half of the women (60.6%) met the physical activity recommendations (30 min/day of MVPA on 5 or more days a week). These women spent on average 71% (approximately 10 hours/day) of their waking time in sedentary behaviours, that is, in activities that expend little energy. We observed that both sedentary behaviour and physical activity levels were similar across the study demographic factors as well as regardless the severity of the disease. Women spent on average 10 min less on MVPA and 22 min less on sedentary behaviours during weekends compared with weekdays.

The present study showed that 60.6% of women met the recommendation to accumulate 30 or more min/day of physical activity of MVPA on most days of the week. The variation in meeting the recommendations was not associated with the study demographic factors, and despite the prevalence of meeting the recommendations tend to be lower in the oldest group, in the overweight group and in those with a higher waist circumference, in those with fibromyalgia being diagnosed more than 5 years ago, and in the retired group, the associations were not statistically significant. Time spent at moderate-intensity physical activity and MVPA tended to be however lower in those with greater BMI (-6.6 min and -7 min, respectively, per BMI category increase, <25, 25-30, >30 kg/m<sup>2</sup>), which concur with studies in healthy adults<sup>29</sup>. This may have important health implications since obese female fibromyalgia patients seem to have higher levels of pain, anxiety and depression and worse quality of life, as well as lower functional capacity than their normal weight peers<sup>34</sup>.

Despite several attempts have been made to objectively quantify sedentary behaviours and physical activity levels in people with fibromyalgia<sup>12 13 35-38</sup>, to our knowledge, there are

1  
2  
3 no previous studies showing the prevalence of meeting the physical activity recommendations  
4  
5 in women with fibromyalgia, which hamper between study comparisons. Mcloughlin et al.<sup>13</sup>  
6  
7 measured physical activity with accelerometry in 26 female fibromyalgia patients aged  
8  
9 42.7±12 years, yet they did not show the prevalence of meeting the recommendations. They  
10  
11 showed however that time spent at moderate intensity using the same intensity threshold as  
12  
13 used in the present study<sup>31</sup> was 15±8 minutes/day which is on average ~35 minutes lower  
14  
15 (using the 51-75 years age group as a reference group) than the time observed in the present  
16  
17 study. Kaleth et al.<sup>12</sup> also measured physical activity with accelerometry in 30 fibromyalgia  
18  
19 patients (27 women), but unfortunately, they did not show physical activity estimates.  
20  
21 Kashikar-Zuck et al.<sup>38</sup> measured physical activity with accelerometry in a juvenile primary  
22  
23 fibromyalgia syndrome group of adolescents and showed that only 23% achieved 30  
24  
25 minutes/day of MVPA, and that only 1 patient achieved the recommended levels of physical  
26  
27 activity for their age, that is 60 minutes/day of MVPA<sup>20 21</sup>. Data coming from apparently  
28  
29 healthy women showed lower rates of meeting the recommendation than those observed in  
30  
31 the present study. Hagströmer et al.<sup>29</sup> reported that 48% of a representative sample of  
32  
33 Swedish women accumulated 30 minutes/day of MVPA, whereas Troiano et al.<sup>28</sup> showed  
34  
35 that less than 5% of a representative sample of women from U.S (2003–2004 National Health  
36  
37 and Nutritional Examination Survey) met the physical activity recommendations.  
38  
39 Methodological procedures used to measure physical activity may partially explain these  
40  
41 differences. Several methodological differences can be noted between our study and the  
42  
43 American study: First, whereas in our study all women had 7 valid days with at least 10 hours  
44  
45 of registered time during waking hours, in the American study, only 26% of the total sample  
46  
47 (adolescent included) had 7 valid days. Of note is that the American study included  
48  
49 participants with just with one or more valid days when calculated population adherence  
50  
51 estimates; second, while we did not include in the analysis the first day of recording to avoid  
52  
53  
54  
55  
56  
57  
58  
59  
60

1  
2  
3 any source of reactivity, the American study included all measured days. Besides the  
4  
5 mentioned methodological difference, it cannot be discarded that cultural differences might  
6  
7 also explain the observed discrepancies between our study and the American study.  
8

9  
10 Sedentary behaviours refer to those activities that do not increase resting energy  
11 expenditure substantially, that is, no more than 1.5 times resting energy expenditure<sup>39</sup>. These  
12 activities involved sitting, reclining and lying down such as watching television, studying,  
13 reading, etc. In the present study we observed that women spend on average 10 hours/day  
14 (~71%) of their waking time in sedentary activities, which is similar to that observed in  
15 Portuguese women<sup>40</sup>, and slightly higher than American and Swedish women (about 7-8  
16 hours)<sup>29</sup>. McLoughlin et al.<sup>13</sup> also measured sedentary time with accelerometry, yet data are  
17 not comparable with our study because they included sleeping time as a sedentary activity.  
18 They reported that women with fibromyalgia spend 1,154±59 minutes/day at sedentary  
19 behaviours, which together with the registered time in other physical activity intensities  
20 summed ~1,440 min, which is a full day. We observed no association of sedentary time with  
21 any of the study demographic factors, which concur with the Swedish study by Hagströmer et  
22 al.<sup>29</sup>. Similarly, women with a higher severity of the disease (FIQ≥70) showed similar  
23 sedentary patterns as those with a FIQ<70, which concur with the findings reported by  
24 McLoughlin et al.<sup>13</sup>.

25  
26 In our study, women with fibromyalgia spend less time (~10 minutes/day) on MVPA  
27 and on sedentary time (~22 minutes/day) during weekends compared with weekdays. These  
28 findings are in agreement with other study<sup>41</sup>. The observed physical activity reduction during  
29 weekends could be partially explained by a reduced transport-related physical activity when  
30 commuting to or from work, whereas the reduction of sedentary time could be due to a  
31 reduced work-related sitting time. More studies quantifying and characterizing physical  
32 activity and sedentary patterns during weekends and weekdays are needed.  
33  
34  
35  
36  
37  
38  
39  
40  
41  
42  
43  
44  
45  
46  
47  
48  
49  
50  
51  
52  
53  
54  
55  
56  
57  
58  
59  
60

1  
2  
3 The present study has several limitations. The cross-sectional design of our study does  
4 not allow establishing any causal relationship. The sample is of convenience and includes the  
5 known limitations of all non-probability samples, including less representativeness and  
6 unknown levels of sampling error. Further studies involving randomly recruited patients with  
7 fibromyalgia are needed. Of note is also the relatively low response rate (29%). We cannot  
8 discard that women who accepted to participate in this study are those more aware of the  
9 importance of having an active lifestyle, which may have influenced the results. It should also  
10 be mentioned that the accelerometer underestimates physical activities that involve upper  
11 body movement, those with minimal vertical displacement such as cycling, water-based  
12 activities such as swimming, and it does not capture well the extra energy cost of load-bearing  
13 activities, such as walking while carrying a backpack. Nevertheless, walking is the most  
14 prevalent leisure-time physical activity among women with fibromyalgia<sup>15</sup>, and is likely the  
15 type of activity they do at work and for transportation. We used the same cut-points for all  
16 ages and BMI levels as suggested elsewhere<sup>29</sup>. Use of a single cut point for all ages and BMI  
17 levels may however lead to an underestimate of moderate-intensity activity for the older and  
18 heavier group by not accounting for the decline in exercise capacity with age and weight. We  
19 do not present data on vigorous physical activity because the time spent at this intensity  
20 ranged from 0 to 2 min (see table 1, subtract moderate intensity to MVPA). On average,  
21 ~98% of the time spend at MVPA is moderate-intensity physical activity. This is consistent  
22 with the available clinical knowledge on this population, and concur with data from  
23 apparently healthy women from Sweden<sup>29</sup>. The observed low levels of vigorous physical  
24 activity could also suggest that the cut point for this intensity was too high, thereby missing  
25 many minutes of activity in our population that should have been classified as vigorous  
26 physical activity. Unfortunately, we have no data on an age- and culturally-matched group of  
27 healthy women, so that direct comparison cannot be made. McLoughlin et al.<sup>13</sup> observed that

1  
2  
3 female fibromyalgia patients (n=26) were less active than a group of healthy women (n=26),  
4  
5 yet the healthy group was younger and had higher level of education than the patients group.  
6  
7 Despite the number of participants in the present study is relatively small, to date, this is the  
8  
9 largest series described in adults. We do not know whether these findings apply to men,  
10  
11 therefore, future studies should quantify both sedentary time and physical activity in this  
12  
13 group of patients. We <sup>42</sup> and others <sup>43</sup> observed gender differences in patients with  
14  
15 fibromyalgia, therefore studies focused on examining gender differences on sedentary time  
16  
17 and physical activity will provide further insights on whether preventive and interventions  
18  
19 strategies should be gender-specific.  
20  
21

22  
23 One of the strengths of the present study was however the strict standardization of  
24  
25 methodology used to measure physical activity, and the fact that all women were compliant  
26  
27 with the measurements procedures. All women had 7 valid days with at least 10 hours of  
28  
29 registered time during waking hours. Indeed, the mean daily accelerometer wear time was  
30  
31 14±1.8 hours/day. We do not know whether women modified their habitual sedentary  
32  
33 behavior or physical activity during the days they were monitored despite they were advised  
34  
35 to keep on with their normal life. To avoid any kind of immediate reactivity, we removed  
36  
37 from the analysis the first day of monitoring.  
38  
39

40  
41 Modifiable lifestyle factors, such as physical activity, may have a great potential as a  
42  
43 public health instrument to prevent and contribute to the treatment of fibromyalgia.  
44  
45 Longitudinal studies are also needed to further understand the predictive value of sedentary  
46  
47 behaviours and physical activity over the course of the disease, and whether preventive  
48  
49 strategies should start at the early stages of the disease development. To have an objective  
50  
51 estimate of the patient's sedentary behaviour as well as the engagement in physical activity  
52  
53 could be used as a potential tool to increase the effectiveness of treatment approaches as well  
54  
55 as to reduce disability and enhance quality of life in people with fibromyalgia. Indeed,  
56  
57



1  
2  
3 Fontaine et al.<sup>44</sup> observed that accumulating 30 minutes of moderate-intensity physical  
4  
5 activity throughout the day produces clinically relevant changes in perceived physical  
6  
7 function and pain in previously minimally active adults with fibromyalgia.  
8

9  
10 In summary, these data provide an objective measure of amount of time spent in  
11  
12 sedentary activities and in physical activity in women with fibromyalgia. These estimates can  
13  
14 be used for comparisons with other rheumatologic diseases, as baseline reference levels for  
15  
16 monitoring, and to assess the effectiveness of intervention strategies promoting physical  
17  
18 activity in women with fibromyalgia.  
19

### 20 21 22 **Acknowledgments**

23  
24 The authors gratefully acknowledge all women for their collaboration. We also acknowledge  
25  
26 the AGRAFIM (association of fibromyalgia from Granada, southern Spain) members  
27  
28 involved in the field work for their effort and great enthusiasm.  
29  
30  
31

### 32 33 **Funding**

34  
35 This study was supported by the Consejería de Turismo, Comercio y Deporte (CTCD-  
36  
37 201000019242-TRA), the Spanish Ministry of Science and Innovation (I+D+I DEP2010-  
38  
39 15639, grants: BES-2009-013442, BES-2011-047133, RYC-2010-05957, RYC-2011-09011),  
40  
41 the Spanish Ministry of Education (AP-2009-3173 and AP2010-0963), Granada Research of  
42  
43 Excellence Initiative on Biohealth (GREIB), Campus BioTic, University of Granada, Spain  
44  
45 and the European University of Madrid, Escuela de Estudios Universitarios Real Madrid  
46  
47 (2010/04RM).  
48  
49  
50  
51  
52  
53  
54  
55  
56  
57  
58  
59  
60

### Author contributions

JRR: Conception and design of the study, data collection, statistical analysis and interpretation of data, drafting the article

VSJ: Data collection, interpretation of data, and revising the article critically for important intellectual content

FOP: Conception and design of the study, interpretation of data, and revising the article critically for important intellectual content

IAG: Data collection, interpretation of data, and revising the article critically for important intellectual content

DCM: Data collection, interpretation of data, and revising the article critically for important intellectual content

VAA: Conception and design of the study, data collection, interpretation of data, and revising the article critically for important intellectual content

ACB: Conception and design of the study, data collection, interpretation of data, and revising the article critically for important intellectual content

PF: Statistical analysis, interpretation of data, and revising the article critically for important intellectual content

DMI: Interpretation of data, and revising the article critically for important intellectual content

MDF: Conception and design of the study, data collection, interpretation of data, and revising the article critically for important intellectual content

## REFERENCES

1. Bennett RM. Clinical manifestations and diagnosis of fibromyalgia. *Rheum Dis Clin North Am* 2009;35(2):215-32.
2. Wilson HD, Robinson JP, Turk DC. Toward the identification of symptom patterns in people with fibromyalgia. *Arthritis Rheum* 2009;61(4):527-34.
3. Branco JC, Bannwarth B, Failde I, Abello Carbonell J, Blotman F, Spaeth M, et al. Prevalence of fibromyalgia: a survey in five European countries. *Semin Arthritis Rheum* 2010;39(6):448-53.
4. Thomas EN, Blotman F. Aerobic exercise in fibromyalgia: a practical review. *Rheumatol Int* 2010;30(9):1143-50.
5. Busch AJ, Webber SC, Brachaniec M, Bidonde J, Bello-Haas VD, Danyliw AD, et al. Exercise therapy for fibromyalgia. *Curr Pain Headache Rep* 2011;15(5):358-67.
6. Kelley GA, Kelley KS, Hootman JM, Jones DL. Exercise and global well-being in community-dwelling adults with fibromyalgia: a systematic review with meta-analysis. *BMC Public Health* 2010;10:198.
7. Hauser W, Klose P, Langhorst J, Moradi B, Steinbach M, Schiltenswolf M, et al. Efficacy of different types of aerobic exercise in fibromyalgia syndrome: a systematic review and meta-analysis of randomised controlled trials. *Arthritis Res Ther* 2010;12(3):R79.
8. Brosseau L, Wells GA, Tugwell P, Egan M, Wilson KG, Dubouloz CJ, et al. Ottawa Panel evidence-based clinical practice guidelines for aerobic fitness exercises in the management of fibromyalgia: part 1. *Phys Ther* 2008;88(7):857-71.
9. Blair SN. Physical inactivity: the biggest public health problem of the 21st century. *Br J Sports Med* 2009;43(1):1-2.

- 1  
2  
3  
4  
5  
6  
7  
8  
9  
10  
11  
12  
13  
14  
15  
16  
17  
18  
19  
20  
21  
22  
23  
24  
25  
26  
27  
28  
29  
30  
31  
32  
33  
34  
35  
36  
37  
38  
39  
40  
41  
42  
43  
44  
45  
46  
47  
48  
49  
50  
51  
52  
53  
54  
55  
56  
57  
58  
59  
60
10. Matthews CE, George SM, Moore SC, Bowles HR, Blair A, Park Y, et al. Amount of time spent in sedentary behaviors and cause-specific mortality in US adults. *Am J Clin Nutr* 2012;95(2):437-45.
  11. Thorp AA, Owen N, Neuhaus M, Dunstan DW. Sedentary behaviors and subsequent health outcomes in adults a systematic review of longitudinal studies, 1996-2011. *Am J Prev Med* 2011;41(2):207-15.
  12. Kaleth AS, Ang DC, Chakr R, Tong Y. Validity and reliability of community health activities model program for seniors and short-form international physical activity questionnaire as physical activity assessment tools in patients with fibromyalgia. *Disabil Rehabil* 2010;32(5):353-9.
  13. McLoughlin MJ, Colbert LH, Stegner AJ, Cook DB. Are women with fibromyalgia less physically active than healthy women? *Med Sci Sports Exerc* 2011;43(5):905-12.
  14. Munguia-Izquierdo D, Legaz-Arrese A, Mannerkorpi K. Transcultural adaptation and psychometric properties of a Spanish-language version of physical activity instruments for patients with fibromyalgia. *Arch Phys Med Rehabil* 2011;92(2):284-94.
  15. Mannerkorpi K, Hernelid C. Leisure Time Physical Activity Instrument and Physical Activity at Home and Work Instrument. Development, face validity, construct validity and test-retest reliability for subjects with fibromyalgia. *Disabil Rehabil* 2005;27(12):695-701.
  16. Mork PJ, Vasseljen O, Nilsen TI. Association between physical exercise, body mass index, and risk of fibromyalgia: longitudinal data from the Norwegian Nord-Trondelag Health Study. *Arthritis Care Res (Hoboken)* 2010;62(5):611-7.

- 1  
2  
3 17. van Poppel MN, Chinapaw MJ, Mokkink LB, van Mechelen W, Terwee CB. Physical  
4 activity questionnaires for adults: a systematic review of measurement properties.  
5  
6 *Sports Med* 2010;40(7):565-600.  
7  
8
- 9 18. Freedson P, Bowles HR, Troiano R, Haskell W. Assessment of physical activity using  
10 wearable monitors: recommendations for monitor calibration and use in the field. *Med*  
11  
12 *Sci Sports Exerc* 2012;44(1 Suppl 1):S1-4.  
13  
14
- 15 19. Carbonell-Baeza A, Ruiz JR, Aparicio VA, Ortega FB, Munguia-Izquierdo D, Alvarez-  
16  
17 Gallardo IC, et al. Land- and water-based exercise intervention in women with  
18  
19 fibromyalgia: the al-Andalus physical activity randomised control trial. *BMC*  
20  
21 *Musculoskelet Disord* 2012;13(1):18.  
22  
23
- 24 20. WHO. Global Recommendations on Physical Activity for Health. World Health Organ  
25  
26 publications. Geneva, Switzerland. 2010.  
27  
28
- 29 21. U.S. DEPARTMENT OF HEALTH AND HUMAN SERVICES. Physical Activity and  
30  
31 Health: A Report of the Surgeon General. Atlanta, GA: U.S. Department of Health and  
32  
33 Human Services, Centres for Disease Control and Prevention, National Centre for  
34  
35 Chronic Disease Prevention and Health Promotion.  
36  
37  
38 (<http://www.cdc.gov/nccdphp/sgr/sgr.htm>, accessed 11 March 2008).  
39  
40
- 41 22. Wolfe F, Smythe HA, Yunus MB, Bennett RM, Bombardier C, Goldenberg DL, et al. The  
42  
43 American College of Rheumatology 1990 Criteria for the Classification of  
44  
45 Fibromyalgia. Report of the Multicenter Criteria Committee. *Arthritis Rheum*  
46  
47 1990;33(2):160-72.  
48
- 49 23. Cardinal BJ, Esters J, Cardinal MK. Evaluation of the revised physical activity readiness  
50  
51 questionnaire in older adults. *Med Sci Sports Exerc* 1996;28(4):468-72.  
52  
53
- 54 24. Rodriguez FA. Spanish version of the Physical Activity Readiness Questionnaire (C-  
55  
56 AAF/rPAR-Q)]. *Arch Med Deporte* 1996;13(51):63-68.  
57  
58  
59  
60

- 1  
2  
3 25. Rivera J, Gonzalez T. The Fibromyalgia Impact Questionnaire: a validated Spanish  
4  
5 version to assess the health status in women with fibromyalgia. *Clin Exp Rheumatol*  
6  
7 2004;22(5):554-60.  
8  
9  
10 26. Burckhardt CS, Clark SR, Bennett RM. The fibromyalgia impact questionnaire:  
11  
12 development and validation. *J Rheumatol* 1991;18(5):728-33.  
13  
14 27. von Elm E, Altman DG, Egger M, Pocock SJ, Gotsche PC, Vandenbroucke JP. The  
15  
16 Strengthening the Reporting of Observational Studies in Epidemiology (STROBE)  
17  
18 statement: guidelines for reporting observational studies. *Ann Intern Med*  
19  
20 2007;147(8):573-7.  
21  
22  
23 28. Troiano RP, Berrigan D, Dodd KW, Masse LC, Tilert T, McDowell M. Physical activity  
24  
25 in the United States measured by accelerometer. *Med Sci Sports Exerc*  
26  
27 2008;40(1):181-8.  
28  
29  
30 29. Hagstromer M, Oja P, Sjostrom M. Physical activity and inactivity in an adult population  
31  
32 assessed by accelerometry. *Med Sci Sports Exerc* 2007;39(9):1502-8.  
33  
34 30. Matthews CE, Chen KY, Freedson PS, Buchowski MS, Beech BM, Pate RR, et al.  
35  
36 Amount of time spent in sedentary behaviors in the United States, 2003-2004. *Am J*  
37  
38 *Epidemiol* 2008;167(7):875-81.  
39  
40  
41 31. Freedson PS, Melanson E, Sirard J. Calibration of the Computer Science and  
42  
43 Applications, Inc. accelerometer. *Med Sci Sports Exerc* 1998;30(5):777-81.  
44  
45 32. Bennett R. The Fibromyalgia Impact Questionnaire (FIQ): a review of its development,  
46  
47 current version, operating characteristics and uses. *Clin Exp Rheumatol* 2005;23(5  
48  
49 Suppl 39):S154-62.  
50  
51  
52 33. Bennett RM, Bushmakina AG, Cappelleri JC, Zlateva G, Sadosky AB. Minimal clinically  
53  
54 important difference in the fibromyalgia impact questionnaire. *J Rheumatol*  
55  
56 2009;36(6):1304-11.  
57  
58  
59  
60

- 1  
2  
3 34. Aparicio VA, Ortega FB, Carbonell-Baeza A, Camiletti D, Ruiz JR, Delgado-Fernandez  
4  
5 M. Relationship of weight status with mental and physical health in female  
6  
7 fibromyalgia patients. *Obes Facts* 2011;4(6):443-8.  
8  
9  
10 35. Kop WJ, Lyden A, Berlin AA, Ambrose K, Olsen C, Gracely RH, et al. Ambulatory  
11  
12 monitoring of physical activity and symptoms in fibromyalgia and chronic fatigue  
13  
14 syndrome. *Arthritis Rheum* 2005;52(1):296-303.  
15  
16 36. Korszun A, Young EA, Engleberg NC, Brucksch CB, Greden JF, Crofford LA. Use of  
17  
18 actigraphy for monitoring sleep and activity levels in patients with fibromyalgia and  
19  
20 depression. *J Psychosom Res* 2002;52(6):439-43.  
21  
22 37. Ellingson LD, Shields MR, Stegner AJ, Cook DB. Physical activity, sustained sedentary  
23  
24 behavior, and pain modulation in women with fibromyalgia. *J Pain* 2012;13(2):195-  
25  
26 206.  
27  
28 38. Kashikar-Zuck S, Flowers SR, Verkamp E, Ting TV, Lynch-Jordan AM, Graham TB, et  
29  
30 al. Actigraphy-based physical activity monitoring in adolescents with juvenile primary  
31  
32 fibromyalgia syndrome. *J Pain* 2010;11(9):885-93.  
33  
34 39. Pate RR, O'Neill JR, Lobelo F. The evolving definition of "sedentary". *Exerc Sport Sci*  
35  
36  
37  
38  
39  
40  
41 40. Baptista F, Santos DA, Silva AM, Mota J, Santos R, Vale S, et al. Prevalence of the  
42  
43 Portuguese population attaining sufficient physical activity. *Med Sci Sports Exerc*  
44  
45 2012;44(3):466-73.  
46  
47 41. Cooper AR, Page A, Fox KR, Misson J. Physical activity patterns in normal, overweight  
48  
49 and obese individuals using minute-by-minute accelerometry. *Eur J Clin Nutr*  
50  
51 2000;54(12):887-94.  
52  
53  
54  
55  
56  
57  
58  
59  
60

- 1  
2  
3 42. Aparicio VA, Ortega FB, Carbonell-Baeza A, Tercedor P, Ruiz JR, Delgado-Fernandez  
4  
5 M. Are there gender differences in quality of life and fibromyalgia symptomatology?  
6  
7 *Am J Mens Health* In press.  
8  
9  
10 43. Miro E, Diener FN, Martinez MP, Sanchez AI, Valenza MC. [Fibromyalgia in men and  
11  
12 women: comparison of the main clinical symptoms]. *Psicothema* 2012;24(1):10-5.  
13  
14 44. Fontaine KR, Conn L, Clauw DJ. Effects of lifestyle physical activity on perceived  
15  
16 symptoms and physical function in adults with fibromyalgia: results of a randomized  
17  
18 trial. *Arthritis Res Ther* 2010;12(2):R55.  
19  
20  
21  
22  
23  
24  
25  
26  
27  
28  
29  
30  
31  
32  
33  
34  
35  
36  
37  
38  
39  
40  
41  
42  
43  
44  
45  
46  
47  
48  
49  
50  
51  
52  
53  
54  
55  
56  
57  
58  
59  
60



**Table 1.** Sedentary time and physical activity levels in women with fibromyalgia, by age group, body mass index, waist circumference and percentage body fat category, years since clinical diagnosis, fibromyalgia impact, marital status, educational level and occupational status<sup>a</sup>.

|                                                            | Sedentary (hours/day) |      |          | Total PA (counts/minutes) |         |      | Moderate PA (min/day) |      |        | MVPA (min/day) |        |  |
|------------------------------------------------------------|-----------------------|------|----------|---------------------------|---------|------|-----------------------|------|--------|----------------|--------|--|
|                                                            | N                     | Mean | 95% CI   | Mean                      | 95% CI  | Mean | 95% CI                | Mean | 95% CI | Mean           | 95% CI |  |
| Age groups (years)                                         |                       |      |          |                           |         |      |                       |      |        |                |        |  |
| 18-50                                                      | 41                    | 10.0 | 9.6 10.5 | 222                       | 196 248 | 51   | 43 59                 | 52   | 44 60  |                |        |  |
| 51-75                                                      | 52                    | 9.9  | 9.5 10.3 | 219                       | 195 242 | 50   | 43 58                 | 52   | 44 59  |                |        |  |
| P value                                                    |                       |      | 0.65     |                           | 0.86    |      | 0.96                  |      | 0.98   |                |        |  |
| Body mass index <sup>b</sup> category (kg/m <sup>2</sup> ) |                       |      |          |                           |         |      |                       |      |        |                |        |  |
| < 25                                                       | 29                    | 10.3 | 9.7 10.8 | 229                       | 199 260 | 56   | 47 65                 | 58   | 48 67  |                |        |  |
| 25-30                                                      | 34                    | 9.5  | 9.0 10.0 | 235                       | 207 263 | 53   | 44 61                 | 54   | 45 63  |                |        |  |
| > 30                                                       | 27                    | 10.1 | 9.6 10.7 | 195                       | 162 227 | 42   | 32 52                 | 43   | 33 54  |                |        |  |
| P for trend                                                |                       |      | 0.63     |                           | 0.14    |      | 0.056                 |      | 0.051  |                |        |  |
| Waist circumference category (cm)                          |                       |      |          |                           |         |      |                       |      |        |                |        |  |
| ≤80                                                        | 44                    | 10.2 | 9.7 10.6 | 233                       | 208 257 | 54   | 47 62                 | 56   | 48 64  |                |        |  |
| >80                                                        | 46                    | 9.7  | 9.3 10.2 | 209                       | 185 234 | 47   | 39 54                 | 48   | 40 56  |                |        |  |
| P value                                                    |                       |      | 0.157    |                           | 0.187   |      | 0.155                 |      | 0.139  |                |        |  |
| Body fat (%)                                               |                       |      |          |                           |         |      |                       |      |        |                |        |  |
| < 30                                                       | 13                    | 10.6 | 9.8 11.4 | 210                       | 164 256 | 48   | 34 63                 | 50   | 35 65  |                |        |  |
| ≥ 30                                                       | 76                    | 9.8  | 9.5 10.2 | 223                       | 204 242 | 51   | 45 57                 | 52   | 46 58  |                |        |  |
| P value                                                    |                       |      | 0.93     |                           | 0.605   |      | 0.709                 |      | 0.774  |                |        |  |
| Years since clinical diagnosis                             |                       |      |          |                           |         |      |                       |      |        |                |        |  |
| ≤ 5 years                                                  | 47                    | 9.9  | 9.5 10.3 | 224                       | 200 248 | 53   | 46 61                 | 54   | 47 62  |                |        |  |
| > 5 years                                                  | 45                    | 9.8  | 9.3 10.2 | 219                       | 194 244 | 49   | 41 56                 | 50   | 43 58  |                |        |  |
| P value                                                    |                       |      | 0.650    |                           | 0.765   |      | 0.420                 |      | 0.489  |                |        |  |
| Fibromyalgia severity (score) <sup>c</sup>                 |                       |      |          |                           |         |      |                       |      |        |                |        |  |
| < 70                                                       | 42                    | 9.9  | 9.4 10.3 | 226                       | 200 251 | 51   | 43 60                 | 53   | 45 61  |                |        |  |
| ≥ 70                                                       | 50                    | 10.0 | 9.6 10.5 | 215                       | 191 238 | 49   | 42 57                 | 50   | 43 58  |                |        |  |
| P value                                                    |                       |      | 0.632    |                           | 0.546   |      | 0.725                 |      | 0.636  |                |        |  |
| Marital status                                             |                       |      |          |                           |         |      |                       |      |        |                |        |  |

|                         |    |      |       |      |     |       |     |    |       |    |    |       |    |
|-------------------------|----|------|-------|------|-----|-------|-----|----|-------|----|----|-------|----|
| Married                 | 72 | 9.9  | 9.6   | 10.3 | 217 | 198   | 237 | 50 | 43    | 56 | 51 | 44    | 57 |
| Unmarried               | 22 | 10.0 | 9.4   | 10.7 | 229 | 194   | 264 | 54 | 43    | 65 | 56 | 44    | 67 |
| P value                 |    |      | 0.710 |      |     | 0.564 |     |    | 0.510 |    |    | 0.436 |    |
| Educational level       |    |      |       |      |     |       |     |    |       |    |    |       |    |
| Below university degree | 71 | 9.9  | 9.6   | 10.3 | 222 | 203   | 242 | 51 | 45    | 57 | 53 | 46    | 59 |
| University degree       | 22 | 10.2 | 9.5   | 10.8 | 218 | 182   | 253 | 50 | 39    | 61 | 51 | 40    | 63 |
| P value                 |    |      | 0.519 |      |     | 0.814 |     |    | 0.791 |    |    | 0.830 |    |
| Occupational status     |    |      |       |      |     |       |     |    |       |    |    |       |    |
| Working                 | 29 | 9.8  | 9.3   | 10.3 | 222 | 196   | 247 | 51 | 43    | 59 | 52 | 44    | 60 |
| Unemployed              | 41 | 10.1 | 9.6   | 10.7 | 236 | 205   | 266 | 55 | 45    | 64 | 57 | 47    | 66 |
| Retired                 | 24 | 10.0 | 9.3   | 10.6 | 197 | 163   | 232 | 45 | 34    | 56 | 46 | 35    | 57 |
| P value                 |    |      | 0.619 |      |     | 0.107 |     |    | 0.187 |    |    | 0.159 |    |

Abbreviations: CI, confidence interval; PA, physical activity; MVPA, moderate- to vigorous-intensity physical activity.

<sup>a</sup> Estimates and P values were adjusted for registered time.

<sup>b</sup> Weight (kg)/height (m)<sup>2</sup>.

<sup>c</sup> Assessed with the Fibromyalgia Impact Questionnaire.

Analyses were conducted with physical activity and sedentary outcome variables logarithmically transformed to obtain a normal distribution, yet crude values are presented in the table for easier interpretation.

**Table 2.** Prevalence of meeting the physical activity recommendations (30 min/day of moderate-to-vigorous-intensity physical activity) on at least 5 days a week.

|                                               | N  | %    | 95%CI |      | Frequency |
|-----------------------------------------------|----|------|-------|------|-----------|
| Age groups (years)                            |    |      |       |      |           |
| 18-50                                         | 41 | 68.3 | 51.9  | 81.9 | 28        |
| 51-75                                         | 52 | 53.8 | 39.5  | 67.8 | 28        |
| Body mass index category (kg/m <sup>2</sup> ) |    |      |       |      |           |
| < 25                                          | 29 | 65.5 | 45.7  | 82.1 | 19        |
| 25-30                                         | 34 | 67.6 | 49.5  | 82.6 | 23        |
| > 30                                          | 27 | 48.1 | 28.7  | 68.1 | 13        |
| Waist circumference category (cm)             |    |      |       |      |           |
| ≤80                                           | 44 | 68.2 | 52.4  | 81.4 | 30        |
| >80                                           | 46 | 54.3 | 39.0  | 69.1 | 25        |
| Body fat (%)                                  |    |      |       |      |           |
| < 30                                          | 13 | 61.5 | 31.6  | 86.1 | 8         |
| ≥ 30                                          | 76 | 61.8 | 50.0  | 72.8 | 47        |
| Years since clinical diagnosis                |    |      |       |      |           |
| ≤ 5 years                                     | 47 | 70.2 | 55.1  | 82.7 | 33        |
| > 5 years                                     | 45 | 53.3 | 37.9  | 68.3 | 24        |
| Fibromyalgia severity                         |    |      |       |      |           |
| < 70                                          | 42 | 66.7 | 50.5  | 80.4 | 28        |
| ≥ 70                                          | 50 | 58   | 43.2  | 71.8 | 29        |
| Marital status                                |    |      |       |      |           |
| Married                                       | 72 | 61.1 | 48.9  | 72.4 | 44        |
| Unmarried                                     | 22 | 59.1 | 36.4  | 79.3 | 13        |
| Educational level                             |    |      |       |      |           |
| Below university degree                       | 71 | 62.0 | 49.7  | 73.2 | 44        |
| University degree                             | 22 | 59.1 | 0.0   | 0.0  | 13        |
| Occupational status                           |    |      |       |      |           |
| Working                                       | 29 | 62.1 | 42.3  | 79.3 | 18        |
| Unemployed                                    | 41 | 68.3 | 51.9  | 81.9 | 28        |
| Retired                                       | 24 | 45.8 | 25.6  | 67.2 | 11        |
| All                                           | 94 | 60.6 | 52.5  | 73.2 | 57        |

Abbreviations: CI, confidence interval (expressed in %).

<sup>a</sup> Assessed with the Fibromyalgia Impact Questionnaire.

**Table 3.** Odds ratio (OR) and 95% confidence interval (CI) of meeting the physical activity recommendations (30 min/day of moderate-to-vigorous-intensity physical activity, 5 of 7 days) by age group, body mass index, waist circumference and percentage body fat category, years since clinical diagnosis, marital status, educational level and occupational status.

|                                               | OR    | 95% CI |       | P value |
|-----------------------------------------------|-------|--------|-------|---------|
| Age groups (years)                            |       |        |       |         |
| 18-50                                         | Ref.  |        |       |         |
| 51-75                                         | 0.542 | 0.231  | 1.273 | 0.160   |
| Body mass index category (kg/m <sup>2</sup> ) |       |        |       |         |
| > 30                                          | Ref.  |        |       |         |
| 25-30                                         | 2.252 | 0.794  | 6.385 | 0.127   |
| < 25                                          | 2.046 | 0.698  | 5.997 | 0.192   |
| Waist circumference category (cm)             |       |        |       |         |
| ≤80                                           | Ref.  |        |       |         |
| >80                                           | 0.556 | 0.235  | 1.312 | 0.180   |
| Body fat category (%)                         |       |        |       |         |
| < 30                                          | Ref.  |        |       |         |
| ≥ 30                                          | 0.987 | 0.297  | 3.309 | 0.983   |
| Years since clinical diagnosis                |       |        |       |         |
| ≤ 5 years                                     | Ref.  |        |       |         |
| > 5 years                                     | 0.485 | 0.206  | 1.142 | 0.098   |
| Fibromyalgia severity (score)*                |       |        |       |         |
| < 70                                          | Ref.  |        |       |         |
| ≥ 70                                          | 0.690 | 0.294  | 1.620 | 0.395   |
| Marital status                                |       |        |       |         |
| Married                                       | Ref.  |        |       |         |
| Unmarried                                     | 0.919 | 0.347  | 2.432 | 0.865   |
| Educational level                             |       |        |       |         |
| Below university degree                       | Ref.  |        |       |         |
| University degree                             | 0.886 | 0.334  | 2.351 | 0.809   |
| Occupational status                           |       |        |       |         |
| Retired                                       | Ref.  |        |       |         |
| Unemployed                                    | 2.545 | 0.902  | 7.187 | 0.078   |
| Working                                       | 1.934 | 0.645  | 5.803 | 0.239   |

Abbreviations: Ref., Reference group.

\* Assessed with the Fibromyalgia Impact Questionnaire.

1  
2  
3  
4  
5  
6  
7  
8  
9  
10  
11  
12  
13  
14  
15  
16  
17  
18  
19  
20  
21  
22  
23  
24  
25  
26  
27  
28  
29  
30  
31  
32  
33  
34  
35  
36  
37  
38  
39  
40  
41  
42  
43  
44  
45  
46  
47  
48  
49

**Table 4.** Sedentary time and physical activity levels during weekdays (Monday to Friday) and during weekends (Saturday and Sunday) in women with fibromyalgia.

|                       | Week  |      | Weekend |      | Difference |          |         |
|-----------------------|-------|------|---------|------|------------|----------|---------|
|                       | mean  | sd   | mean    | sd   | mean       | 95% CI   | P value |
| Sedentary (hours/day) | 10.0  | 2.2  | 9.6     | 2.5  | 0.4        | 0.0 0.8  | 0.051   |
| Total PA (counts/min) | 225.1 | 88.5 | 201.0   | 98.0 | 24.0       | 7.8 40.2 | 0.004   |
| Moderate PA (min/day) | 53.1  | 28.4 | 42.6    | 28.0 | 10.5       | 5.5 15.5 | <0.001  |
| MVPA (min/day)        | 54.3  | 29.1 | 43.8    | 29.7 | 10.6       | 5.5 15.6 | <0.001  |

Abbreviations: CI, confidence interval; PA, physical activity; MVPA, moderate-to-vigorous-intensity physical activity; sd, Standard deviation. Analyses were conducted with physical activity and sedentary outcome variables logarithmically transformed to obtain a normal distribution, yet crude values are presented in the table for easier interpretation.

1  
2  
3 **Figure legend**  
4

5 **Figure 1.** Sedentary time and physical activity (PA) mean time by week and weekend days.  
6  
7  
8  
9  
10  
11  
12  
13  
14  
15  
16  
17  
18  
19  
20  
21  
22  
23  
24  
25  
26  
27  
28  
29  
30  
31  
32  
33  
34  
35  
36  
37  
38  
39  
40  
41  
42  
43  
44  
45  
46  
47  
48  
49  
50  
51  
52  
53  
54  
55  
56  
57  
58  
59  
60

For peer review only

1  
2  
3  
4  
5  
6  
7  
8  
9  
10  
11  
12  
13  
14  
15  
16  
17  
18  
19  
20  
21  
22  
23  
24  
25  
26  
27  
28  
29  
30  
31  
32  
33  
34  
35  
36  
37  
38  
39  
40  
41  
42  
43  
44  
45  
46  
47  
48  
49  
50  
51  
52  
53  
54  
55  
56  
57  
58  
59  
60

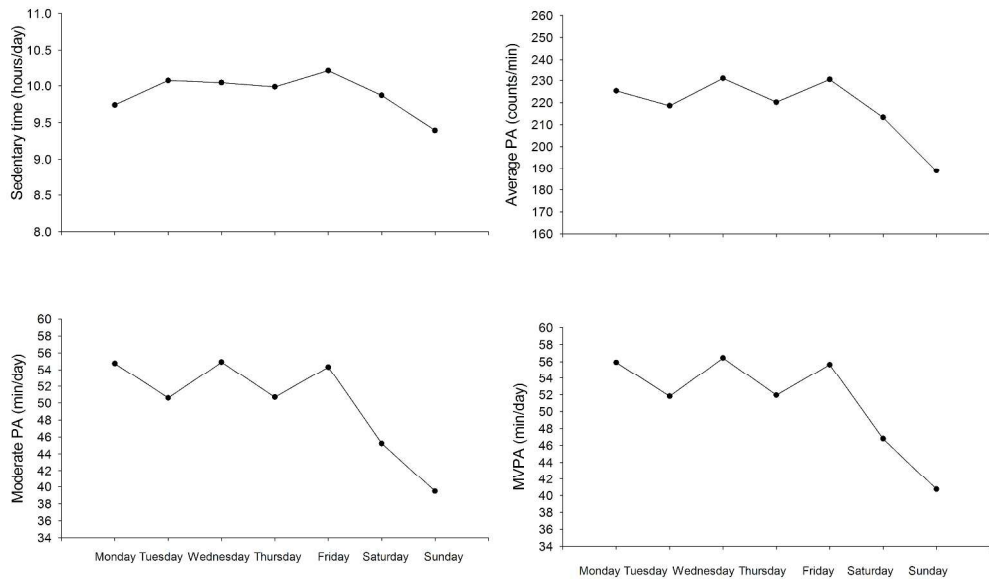

739x452mm (150 x 150 DPI)

Review only

**STROBE 2007 (v4) checklist of items to be included in reports of observational studies in epidemiology\***  
**Checklist for cohort, case-control, and cross-sectional studies (combined)**

| Section/Topic             | Item # | Recommendation                                                                                                                                                                                                                                                                                                                                                                                                                                                         | Reported on page # |
|---------------------------|--------|------------------------------------------------------------------------------------------------------------------------------------------------------------------------------------------------------------------------------------------------------------------------------------------------------------------------------------------------------------------------------------------------------------------------------------------------------------------------|--------------------|
| Title and abstract        | 1      | (a) Indicate the study's design with a commonly used term in the title or the abstract                                                                                                                                                                                                                                                                                                                                                                                 | 1                  |
|                           |        | (b) Provide in the abstract an informative and balanced summary of what was done and what was found                                                                                                                                                                                                                                                                                                                                                                    | 2                  |
| <b>Introduction</b>       |        |                                                                                                                                                                                                                                                                                                                                                                                                                                                                        |                    |
| Background/rationale      | 2      | Explain the scientific background and rationale for the investigation being reported                                                                                                                                                                                                                                                                                                                                                                                   | 3                  |
| Objectives                | 3      | State specific objectives, including any pre-specified hypotheses                                                                                                                                                                                                                                                                                                                                                                                                      | 4                  |
| <b>Methods</b>            |        |                                                                                                                                                                                                                                                                                                                                                                                                                                                                        |                    |
| Study design              | 4      | Present key elements of study design early in the paper                                                                                                                                                                                                                                                                                                                                                                                                                | 6                  |
| Setting                   | 5      | Describe the setting, locations, and relevant dates, including periods of recruitment, exposure, follow-up, and data collection                                                                                                                                                                                                                                                                                                                                        | 6                  |
| Participants              | 6      | (a) <i>Cohort study</i> —Give the eligibility criteria, and the sources and methods of selection of participants. Describe methods of follow-up<br><i>Case-control study</i> —Give the eligibility criteria, and the sources and methods of case ascertainment and control selection. Give the rationale for the choice of cases and controls<br><i>Cross-sectional study</i> —Give the eligibility criteria, and the sources and methods of selection of participants | 6                  |
|                           |        | (b) <i>Cohort study</i> —For matched studies, give matching criteria and number of exposed and unexposed<br><i>Case-control study</i> —For matched studies, give matching criteria and the number of controls per case                                                                                                                                                                                                                                                 | 6                  |
| Variables                 | 7      | Clearly define all outcomes, exposures, predictors, potential confounders, and effect modifiers. Give diagnostic criteria, if applicable                                                                                                                                                                                                                                                                                                                               | 6-9                |
| Data sources/ measurement | 8*     | For each variable of interest, give sources of data and details of methods of assessment (measurement). Describe comparability of assessment methods if there is more than one group                                                                                                                                                                                                                                                                                   | 6-9                |
| Bias                      | 9      | Describe any efforts to address potential sources of bias                                                                                                                                                                                                                                                                                                                                                                                                              | 6                  |
| Study size                | 10     | Explain how the study size was arrived at                                                                                                                                                                                                                                                                                                                                                                                                                              | 6                  |
| Quantitative variables    | 11     | Explain how quantitative variables were handled in the analyses. If applicable, describe which groupings were chosen and why                                                                                                                                                                                                                                                                                                                                           | 9                  |
| Statistical methods       | 12     | (a) Describe all statistical methods, including those used to control for confounding                                                                                                                                                                                                                                                                                                                                                                                  | 9                  |
|                           |        | (b) Describe any methods used to examine subgroups and interactions                                                                                                                                                                                                                                                                                                                                                                                                    | 9                  |
|                           |        | (c) Explain how missing data were addressed                                                                                                                                                                                                                                                                                                                                                                                                                            | 9                  |
|                           |        | (d) <i>Cohort study</i> —If applicable, explain how loss to follow-up was addressed<br><i>Case-control study</i> —If applicable, explain how matching of cases and controls was addressed                                                                                                                                                                                                                                                                              | 9                  |



|                          |     |                                                                                                                                                                                                                                                                                                                                                                                                               |       |
|--------------------------|-----|---------------------------------------------------------------------------------------------------------------------------------------------------------------------------------------------------------------------------------------------------------------------------------------------------------------------------------------------------------------------------------------------------------------|-------|
|                          |     | <i>Cross-sectional study</i> —If applicable, describe analytical methods taking account of sampling strategy                                                                                                                                                                                                                                                                                                  |       |
|                          |     | (e) Describe any sensitivity analyses                                                                                                                                                                                                                                                                                                                                                                         | 9     |
| <b>Results</b>           |     |                                                                                                                                                                                                                                                                                                                                                                                                               |       |
| Participants             | 13* | (a) Report numbers of individuals at each stage of study—eg numbers potentially eligible, examined for eligibility, confirmed eligible, included in the study, completing follow-up, and analysed<br>(b) Give reasons for non-participation at each stage<br>(c) Consider use of a flow diagram                                                                                                               | 10-11 |
| Descriptive data         | 14* | (a) Give characteristics of study participants (eg demographic, clinical, social) and information on exposures and potential confounders<br>(b) Indicate number of participants with missing data for each variable of interest<br>(c) <i>Cohort study</i> —Summarise follow-up time (eg, average and total amount)                                                                                           | 10-11 |
| Outcome data             | 15* | <i>Cohort study</i> —Report numbers of outcome events or summary measures over time<br><i>Case-control study</i> —Report numbers in each exposure category, or summary measures of exposure<br><i>Cross-sectional study</i> —Report numbers of outcome events or summary measures                                                                                                                             | 10-11 |
| Main results             | 16  | (a) Give unadjusted estimates and, if applicable, confounder-adjusted estimates and their precision (eg, 95% confidence interval). Make clear which confounders were adjusted for and why they were included<br>(b) Report category boundaries when continuous variables were categorized<br>(c) If relevant, consider translating estimates of relative risk into absolute risk for a meaningful time period |       |
| Other analyses           | 17  | Report other analyses done—eg analyses of subgroups and interactions, and sensitivity analyses                                                                                                                                                                                                                                                                                                                |       |
| <b>Discussion</b>        |     |                                                                                                                                                                                                                                                                                                                                                                                                               |       |
| Key results              | 18  | Summarise key results with reference to study objectives                                                                                                                                                                                                                                                                                                                                                      | 12    |
| Limitations              | 19  | Discuss limitations of the study, taking into account sources of potential bias or imprecision. Discuss both direction and magnitude of any potential bias                                                                                                                                                                                                                                                    | 15-16 |
| Interpretation           | 20  | Give a cautious overall interpretation of results considering objectives, limitations, multiplicity of analyses, results from similar studies, and other relevant evidence                                                                                                                                                                                                                                    | 15-16 |
| Generalisability         | 21  | Discuss the generalisability (external validity) of the study results                                                                                                                                                                                                                                                                                                                                         | 15-16 |
| <b>Other information</b> |     |                                                                                                                                                                                                                                                                                                                                                                                                               |       |
| Funding                  | 22  | Give the source of funding and the role of the funders for the present study and, if applicable, for the original study on which the present article is based                                                                                                                                                                                                                                                 | 17    |

\*Give information separately for cases and controls in case-control studies and, if applicable, for exposed and unexposed groups in cohort and cross-sectional studies.

**Note:** An Explanation and Elaboration article discusses each checklist item and gives methodological background and published examples of transparent reporting. The STROBE checklist is best used in conjunction with this article (freely available on the Web sites of PLoS Medicine at <http://www.plosmedicine.org/>, Annals of Internal Medicine at <http://www.annals.org/>, and Epidemiology at <http://www.epidem.com/>). Information on the STROBE Initiative is available at [www.strobe-statement.org](http://www.strobe-statement.org).



**'Objectively measured sedentary time and physical activity  
in women with fibromyalgia; A cross-sectional study'**

|                                 |                                                                                                                                                                                                                                                                                                                                                                                                                                                                                                                                                                                                                                                                                                                                                                                                                                                                                                                                                                             |
|---------------------------------|-----------------------------------------------------------------------------------------------------------------------------------------------------------------------------------------------------------------------------------------------------------------------------------------------------------------------------------------------------------------------------------------------------------------------------------------------------------------------------------------------------------------------------------------------------------------------------------------------------------------------------------------------------------------------------------------------------------------------------------------------------------------------------------------------------------------------------------------------------------------------------------------------------------------------------------------------------------------------------|
| Journal:                        | <i>BMJ Open</i>                                                                                                                                                                                                                                                                                                                                                                                                                                                                                                                                                                                                                                                                                                                                                                                                                                                                                                                                                             |
| Manuscript ID:                  | bmjopen-2013-002722.R2                                                                                                                                                                                                                                                                                                                                                                                                                                                                                                                                                                                                                                                                                                                                                                                                                                                                                                                                                      |
| Article Type:                   | Research                                                                                                                                                                                                                                                                                                                                                                                                                                                                                                                                                                                                                                                                                                                                                                                                                                                                                                                                                                    |
| Date Submitted by the Author:   | 12-Apr-2013                                                                                                                                                                                                                                                                                                                                                                                                                                                                                                                                                                                                                                                                                                                                                                                                                                                                                                                                                                 |
| Complete List of Authors:       | Ruiz, Jonatan; Karolinska Institutet, Department of Biosciences and Nutrition<br>Segura-Jiménez, Victor; University of Granada, Department of Physical Education and Sport, School of Sport Sciences<br>Ortega, Francisco; University of Granada and Karolinska Institutet<br>Alvarez, Inmaculada; University of Granada, Physical Education and Sport<br>Camiletti, Daniel; University of Granada, Department of Physiology<br>Aparicio, Virginia; University of Granada, Department of Physical Education and Sport, School of Sport Sciences<br>Carbonell-Baeza, Ana; University of Granada, 1. Department of Physical Education and Sport<br>Femia, Pedro; University of Granada, Department of Physiology<br>Munguia-Izquierdo, Diego; University Pablo de Olavide, 6Department of Sports and Informatics. Section of Physical education and Sports. Faculty of Sport.<br>Delgado-Fernández, Manuel; University of Granada, Department of Physical Education and Sport |
| <b>Primary Subject Heading</b>: | Public health                                                                                                                                                                                                                                                                                                                                                                                                                                                                                                                                                                                                                                                                                                                                                                                                                                                                                                                                                               |
| Secondary Subject Heading:      | Epidemiology, Rheumatology                                                                                                                                                                                                                                                                                                                                                                                                                                                                                                                                                                                                                                                                                                                                                                                                                                                                                                                                                  |
| Keywords:                       | EPIDEMIOLOGY, PREVENTIVE MEDICINE, PUBLIC HEALTH, RHEUMATOLOGY                                                                                                                                                                                                                                                                                                                                                                                                                                                                                                                                                                                                                                                                                                                                                                                                                                                                                                              |
|                                 |                                                                                                                                                                                                                                                                                                                                                                                                                                                                                                                                                                                                                                                                                                                                                                                                                                                                                                                                                                             |

SCHOLARONE™  
Manuscripts

1  
2  
3  
4  
5  
6  
7 **‘Objectively measured sedentary time and physical activity in women with**  
8 **fibromyalgia; A cross-sectional study’**  
9

10  
11  
12  
13  
14  
15  
16 Jonatan R Ruiz<sup>1\*</sup>, Víctor Segura-Jiménez<sup>2</sup>, Francisco B Ortega<sup>1</sup>, Inmaculada C Álvarez-  
17 Gallardo<sup>1</sup>, Daniel Camiletti-Moirón<sup>2,3</sup>, Virginia A Aparicio<sup>2,3</sup>, Ana Carbonell-Baeza<sup>2,4</sup>, Pedro  
18 Femia<sup>5</sup>, Diego Munguía-Izquierdo<sup>6</sup>, Manuel Delgado-Fernández<sup>2</sup>  
19  
20  
21  
22  
23  
24  
25  
26

27 <sup>1</sup> PROFITH “PROmoting FITness and Health through physical activity” research group,  
28 Department of Physical Education and Sports, Faculty of Sport Sciences, University of  
29 Granada, Spain.  
30  
31  
32

33  
34 <sup>2</sup>Department of Physical Education and Sport, School of Sport Sciences, University of  
35 Granada, Granada, Spain  
36  
37

38 <sup>3</sup>Department of Physiology, School of Pharmacy, University of Granada, Granada, Spain  
39

40 <sup>4</sup>Department of Physical Education, School of Education, University of Cadiz, Cadiz, Spain  
41  
42

43 <sup>5</sup>Department of Biostatistics, School of Medicine, University of Granada, Granada, Spain  
44

45 <sup>6</sup>Department of Sports and Informatics. Section of Physical education and Sports. Faculty of  
46 Sport. University Pablo de Olavide, Seville, Spain  
47  
48

49 **\*Address for correspondence:** Jonatan R. Ruiz, PhD. Department of Physical Education and  
50 Sport, School of Sport Sciences. University of Granada, Granada, Spain; [ruizj@ugr.es](mailto:ruizj@ugr.es)  
51  
52  
53  
54  
55  
56  
57  
58  
59  
60

## ARTICLE SUMMARY

### Article focus:

- To characterize the levels of objectively measured sedentary time and physical activity (using accelerometry) in women with fibromyalgia.
- To provide estimates of the adherence to recommended levels of physical activity assessed by accelerometry (30 minutes of moderate-to-vigorous-intensity physical activity on 5 of 7 days).

### Key Messages

- Over 60% of women with fibromyalgia meet the physical activity recommendations, that is, 30 min/day of moderate-to-vigorous-intensity physical activity on 5 or more days a week.
- These women spent about 71% (approximately 10 hours/day) of their waking time in activities that expend little energy.
- Women with fibromyalgia spent on average 10 min less of moderate-to-vigorous-intensity physical activity and 22 min less of sedentary behaviours during weekends compared with weekdays.

### Strengths and Limitations

- Strict standardization of the methodology used to measure physical activity and the fact that all women were compliant with the measurements procedures is a strength.
- All women had 7 valid days with at least 10 hours of registered time during waking hours.
- To avoid any kind of immediate reactivity, we removed from the analysis the first day of monitoring.

- The cross-sectional design of our study does not allow however establishing any causal relationships. The sample is of convenience, which includes the known limitations of all non-probability samples.
- The accelerometer underestimates physical activities that involve upper body movement, those with minimal vertical displacement such as cycling, water-based activities such as swimming. Moreover, it does not capture well the extra energy cost of load-bearing activities such as walking while carrying a backpack.

## ABSTRACT

**Objectives:** To characterize levels of objectively measured sedentary time and physical activity in women with fibromyalgia.

**Design:** Cross-sectional study.

**Setting:** Local Association of Fibromyalgia (Granada, Spain).

**Participants:** The study comprised 94 women with diagnosed fibromyalgia who did not have other severe somatic or psychiatric disorders, or other diseases that prevent physical loading, able to ambulate and to communicate, and capable and willing to provide informed consent.

**Primary outcome measures:** Sedentary time and physical activity was measured by accelerometry and was expressed as time spent in sedentary behaviours, average physical activity intensity (counts/minute) and amount of time (minutes/day) spent in moderate-intensity and in moderate-to vigorous-intensity physical activity (MVPA).

**Results:** The proportion of women meeting the physical activity recommendations of 30 min/day of MVPA on 5 or more days a week was 60.6%. Women spent on average 71% of their waking time (approximately 10 hours/day) in sedentary behaviours. Both sedentary behaviour and physical activity levels were similar across age groups, waist circumference and percentage body fat categories, years since clinical diagnosis, marital status, educational level, occupational status, as well as regardless the severity of the disease (all  $P > 0.1$ ). Time spent at moderate-intensity physical activity and MVPA was however lower in those with greater BMI (-6.6 min and -7 min respectively, per BMI category increase, <25, 25-30, >30 kg/m<sup>2</sup>; P values for trend were 0.056 and 0.051 respectively). Women spent on average 10 min less on MVPA ( $P < 0.001$ ) and 22 min less on sedentary behaviours during weekends compared with weekdays ( $P = 0.051$ ).

**Conclusions:** These data provide an objective measure of the amount of time spent in sedentary activities and in physical activity in women with fibromyalgia.

1  
2  
3  
4  
5  
6  
7  
8  
9  
10  
11  
12  
13  
14  
15  
16  
17  
18  
19  
20  
21  
22  
23  
24  
25  
26  
27  
28  
29  
30  
31  
32  
33  
34  
35  
36  
37  
38  
39  
40  
41  
42  
43  
44  
45  
46  
47  
48  
49  
50  
51  
52  
53  
54  
55  
56  
57  
58  
59  
60

Extra data is available by emailing [ruizj@ugr.es](mailto:ruizj@ugr.es)

For peer review only

## INTRODUCTION

Fibromyalgia is a pain regulation-related disorder <sup>1</sup>. Patients usually present an increased sensitivity to painful stimuli (hyperalgesia) and lowered pain threshold (allodynia). In addition to pain, fibromyalgia symptoms typically include severe fatigue, sleep disturbances, paresthesia of extremities, depression, anxiety, joint stiffness, and memory and cognitive difficulties <sup>1 2</sup>. Fibromyalgia is becoming a common syndrome in Western European countries, and estimates indicate a point prevalence of 2.9% which translates to approximately 6 million people with fibromyalgia <sup>3</sup>.

There is increasing evidence about the potential benefits of regular physical activity on fibromyalgia-related symptoms <sup>4-7</sup>, and International organizations supports the use of physical activity-based interventions as a complementary tool in the therapeutic armamentarium against fibromyalgia <sup>8</sup>. Physical inactivity is one of the major public health problems of the 21<sup>st</sup> century <sup>9</sup>, and several longitudinal studies showed the negative consequences for health of a sedentary lifestyle <sup>10 11</sup>.

The average amount of daily sedentary time as well as physical activity in women with fibromyalgia is rather unknown, and the available information is mainly questionnaire-based <sup>12-16</sup>. However, physical activities are difficult to recall, quantify and categorize <sup>17</sup>, and it might be even more complex in people with memory and cognitive difficulties such as fibromyalgia patients <sup>14</sup>. Given the limitations of self-report methods, accelerometry (i.e. movement sensors) has become the method of choice for objectively measuring physical activity in free-living conditions <sup>18</sup>. To have an objective diagnosis of the sedentary time as well as of the physical activity levels in patients with fibromyalgia is of public health and of clinical interest, and might be informative for developing intervention studies directed to the promotion of physical activity in women with fibromyalgia <sup>19</sup>.



1  
2  
3 The purpose of the present study was to characterize the levels of objectively  
4 measured (using accelerometry) sedentary time and physical activity among women with  
5 fibromyalgia, and to provide estimates of the adherence to recommended levels of physical  
6 activity [30 minutes of moderate-to-vigorous-intensity physical activity (MVPA) on 5 of 7  
7 days] <sup>20 21</sup> .  
8  
9  
10  
11  
12  
13  
14  
15  
16  
17  
18  
19  
20  
21  
22  
23  
24  
25  
26  
27  
28  
29  
30  
31  
32  
33  
34  
35  
36  
37  
38  
39  
40  
41  
42  
43  
44  
45  
46  
47  
48  
49  
50  
51  
52  
53  
54  
55  
56  
57  
58  
59  
60

For peer review only

## MATERIAL AND METHODS

### Study participants

We sent a formal invitation to participate in the study to all members (n=400) of a Local Association of Fibromyalgia (Granada, Spain). A total of 116 patients responded (response rate 29%), and gave their written informed consent after receiving detailed information about the aims and study procedures. Participants were included in the study if: (i) they met the diagnosis of fibromyalgia according to the American College of Rheumatology criteria<sup>22</sup> (widespread pain for more than 3 months, and pain with 4 kg/cm<sup>2</sup> of pressure reported for 11 or more of 18 tender points), (ii) did not have other severe somatic or psychiatric disorders, or other diseases that prevent physical loading (answer “no” to all questions on the Physical Activity Readiness Questionnaire-PAR-Q<sup>23 24</sup>), (iii) were able to ambulate and to communicate, (iv) and were capable and willing to provide informed consent. Men were not included in the study (n=6), and women with incomplete physical activity data (n=5) or technical errors in the instrument (n=11) were excluded. A final sample of 94 women with fibromyalgia participated in the study. Age, weight and height, and fibromyalgia severity (assessed by the fibromyalgia impact questionnaire, FIQ)<sup>25 26</sup> was similar between the included and excluded participants (all P>0.1). The study protocol was reviewed and approved by the Ethics Committee of the Hospital Virgen de las Nieves (Granada, Spain). The STROBE guidelines were followed during the course of the research<sup>27</sup>.

### Measurements

Women were interviewed in the Association of Fibromyalgia (Granada, Spain). They were asked to wear an accelerometer (Actigraph<sup>TM</sup> GT1M, Pensacola, FL, USA) for 9 consecutive days starting the same day they received the monitor. The accelerometer was carried over the whole day (24 hrs) except during water-based activities such as bathing or swimming.

1  
2  
3 Accelerometers were initialized as described by the manufacturer, and data were recorded in 5  
4 seconds epochs. Women wore the device on the lower back, secured with an elastic belt,  
5 underneath clothing, near to the center of gravity. The data were downloaded onto a computer  
6 using the manufacturer software. Data reduction, cleaning and analyses were performed using  
7 the MAHUFFE program (see [http://www.mrc-  
8 epid.cam.ac.uk/Research/Programmes/Programme\\_5/InDepth/Programme%205\\_Downloads.  
9 html](http://www.mrc-epid.cam.ac.uk/Research/Programmes/Programme_5/InDepth/Programme%205_Downloads.html)).  
10  
11  
12  
13  
14  
15  
16  
17

18 Monitor wearing time was calculated by subtracting the sleeping reported time  
19 (recorded through a diary) from the total registered time for the entire day (i.e. 1440 minutes).  
20 Bouts of 60 continuous minutes of 0 activity intensity counts were also excluded from the  
21 analysis, considering these periods as non-wearing time<sup>28</sup>. There was no allowance for any  
22 minute with counts between 0-100 in the non-wear periods. A recording of more than 20,000  
23 counts per minute (cpm) was considered as a potential malfunction of the accelerometer and  
24 the value was excluded from the analyses<sup>28 29</sup>. The first and last days of recording were not  
25 included in the analysis. A total of 7 days (full week) of recording with a minimum of 10 or  
26 more hours of registration per day was necessary to be included in the study analysis.  
27  
28  
29  
30  
31  
32  
33  
34  
35  
36  
37

38 Sedentary time was estimated as the amount of time accumulated below 100 cpm  
39 during periods of wear time<sup>30</sup>. Time spent being sedentary was expressed as total duration  
40 (hours/day). Physical activity levels were estimated as follows: (i) Average physical activity  
41 intensity was expressed as mean cpm, and is a measure of overall physical activity. We  
42 calculated mean cpm as the sum of total counts per day divided by the number of minutes of  
43 wear time in that day; finally calculating the average of all valid days (n=7). (ii) Time  
44 engaged in moderate physical activity. We calculated the time engaged in moderate-intensity  
45 physical activity based upon a standardized cut-off of 1952-5724 cpm<sup>29 31</sup>, where 1952 cpm  
46 corresponds to walking at 4 km/hour<sup>31</sup>. (iii) We also calculated the time engaged in MVPA as  
47  
48  
49  
50  
51  
52  
53  
54  
55  
56  
57  
58  
59  
60

1  
2  
3 the amount of time accumulated  $\geq 1952$  cpm. Sedentary time, as well as the study physical  
4  
5 activity variables was calculated for weekdays and weekends. We calculated the proportion of  
6  
7 women meeting the physical activity recommendations, that is 30 minutes/day of MVPA at  
8  
9 least 5 of 7 days<sup>20 21</sup>.

10  
11 Weight and height were measured following standard procedures with a scale (InBody  
12  
13 720, Biospace, Seoul, Korea) and a stadiometer (Seca 22, Hamburg, Germany) respectively,  
14  
15 and body mass index (BMI, weight in kg divided by height in m<sup>2</sup>) was calculated. Percentage  
16  
17 body fat was measured with bioelectrical impedance analysis (InBody R20; Biospace,  
18  
19 Gateshead, UK). Waist circumference was measured at the level of the umbilicus with an  
20  
21 anthropometric un-elastic tape (Harpenden anthropometric tape Holtain Ltd). Weight status  
22  
23 groups were based on standard clinical definitions for BMI (normal weight: 18.5-24.9 kg/m<sup>2</sup>,  
24  
25 overweight: 25.0-29.9 kg/m<sup>2</sup>, obese: 30.0 kg/m<sup>2</sup> or higher); percentage body fat (normal:  
26  
27 <30%; obese:  $\geq 30\%$ ); and waist circumference (normal:  $\leq 80.0$  cm; abdominal obesity:  $> 80$   
28  
29 cm). One woman had a BMI below 18.5 kg/m<sup>2</sup> (18 kg/m<sup>2</sup>) and was included in the normal  
30  
31 weight group.  
32  
33  
34  
35

36 Fibromyalgia severity was assessed with the fibromyalgia impact questionnaire (FIQ)  
37  
38<sup>25 26</sup>. FIQ is composed of ten subscales: physical impairment, overall well-being, work missed,  
39  
40 job difficulty, pain, fatigue, morning tiredness, stiffness, anxiety and depression. The score of  
41  
42 each subscale was standardized from 0 to 10. We summed the score of all items, so that the  
43  
44 total score ranged from 0 to 100, with a higher score indicating greater severity. Women were  
45  
46 categorized into two groups based on the FIQ total score as FIQ  $< 70$  and FIQ  $\geq 70$ . These  
47  
48 thresholds corresponds with having moderate or severe fibromyalgia respectively<sup>32</sup>.  
49  
50  
51  
52  
53

#### 54 **Statistical analysis**

55  
56  
57  
58  
59  
60

1  
2  
3 All statistical analyses were performed with PASW (Predictive Analytics SoftWare, v. 18.0  
4 SPSS Inc., Chicago, IL, USA), and the level of significance was set at  $\alpha = 0.05$ . Physical  
5 activity and sedentary outcome variables were logarithmically transformed to obtain a normal  
6 distribution.  
7  
8  
9

10  
11 We calculated the estimated means of sedentary time, average physical activity  
12 intensity, moderate physical activity and MVPA by age group, BMI and waist circumference  
13 categories, years since clinical diagnosis, fibromyalgia severity, marital status, educational  
14 level and occupational status, after adjusting for registered time. Linear regression analysis  
15 was conducted to examine the association of sedentary time, average physical activity  
16 intensity, moderate-intensity physical activity and MVPA (inserted as dependent variables)  
17 with age group, BMI, waist circumference and percentage body fat categories, years since  
18 clinical diagnosis, fibromyalgia severity and educational level (inserted as independent  
19 variables). Independent variables were inserted as ordinal variables. As marital status and  
20 occupational status categories were not ordinal variables, we conducted one-way analysis of  
21 covariance to determine mean differences in sedentary time and physical activity levels  
22 among marital status and occupational status categories. Separate analyses were conducted for  
23 each dependent and independent variable. Registered time was entered as confounder in all  
24 models. Mean differences of sedentary time, physical activity, moderate physical activity and  
25 MVPA levels on week days (Monday to Friday) vs. weekend (Saturday and Sunday) were  
26 estimated with one-way analysis of variance for repeated measures.  
27  
28  
29  
30  
31  
32  
33  
34  
35  
36  
37  
38  
39  
40  
41  
42  
43  
44  
45  
46

47 We analysed the association of meeting the physical activity recommendations ( $\geq 30$   
48 minutes/day of MVPA on 5 of 7 days a week) with age, waist circumference and percentage  
49 body fat, years since clinical diagnosis, fibromyalgia severity, marital status, educational level  
50 and using binary logistic regression analysis. Multinomial regression analysis was conducted  
51  
52  
53  
54  
55  
56  
57  
58  
59  
60

1  
2  
3 to examine the association of meeting the physical activity recommendations with BMI and  
4  
5 occupational status categories.  
6  
7  
8  
9  
10  
11  
12  
13  
14  
15  
16  
17  
18  
19  
20  
21  
22  
23  
24  
25  
26  
27  
28  
29  
30  
31  
32  
33  
34  
35  
36  
37  
38  
39  
40  
41  
42  
43  
44  
45  
46  
47  
48  
49  
50  
51  
52  
53  
54  
55  
56  
57  
58  
59  
60

For peer review only

## RESULTS

All participants had 7 valid days of registration. Mean registered time during waking time was 842±108 minutes/day (~14±1.8 hours). There was no significant association of sedentary time and physical activity with age group, waist circumference and percentage body fat categories, years since clinical diagnosis, fibromyalgia severity, marital status, educational level and occupational status (all P>0.1, Table 1). Levels of moderate-intensity physical activity and MVPA were lower in women with greater BMI ( $\hat{\beta}$  = -6.6±3.4 and -7±3.6 min respectively, per BMI category increase (i.e. 18.5-24.9 kg/m<sup>2</sup>, 25.0-29.9 kg/m<sup>2</sup>, and ≥30.0 kg/m<sup>2</sup>; P values for trend were 0.056 and 0.051 respectively, Table 1). Mean estimates of sedentary time and physical activity intensity levels were similar in women with FIQ <70 compared with those with FIQ ≥70 (all P>0.5, Table 1). For sensitivity analyses, we explored whether the association between physical activity intensity levels and FIQ differ when a different FIQ threshold (FIQ ≥59)<sup>33</sup> was used, yet the findings persisted (data not shown).

The proportion of women meeting the physical activity recommendations by age group, BMI, waist circumference and percentage body fat categories, years since clinical diagnosis, fibromyalgia severity, marital status, educational level and occupational status are shown in Table 2. The proportion of women meeting the physical activity recommendations was 60.6% (n=57, 95%CI: 52.5-73.2%). The OR of meeting the physical activity recommendations were lower, yet not reaching statistical significance, in the oldest group (OR: 0.542, 95%CI: 0.231-1.237, P=0.160), in those with a high waist circumference (OR: 0.556, 95%CI: 0.235-1.312, P=0.180), and in those diagnosed with fibromyalgia more than 5 years ago (OR: 0.485, 95%CI: 0.206-1.142, P=0.098) (Table 3). The OR of meeting the physical activity recommendations was higher, yet not reaching statistical significance, in non-overweight (BMI <25kg/m<sup>2</sup>) and in the overweight (BMI=25-30kg/m<sup>2</sup>) group compared with the obese peers (OR: 2.046, 95%CI: 0.698-5.997, P=0.192; OR: 2.252, 95%CI: 0.794-

1  
2  
3 6.385, P=0.127) (Table 4). Unemployed women had also higher OR of meeting the  
4  
5 recommendations (OR: 2.545, 95%CI: 0.902-7.187, P=0.078). The OR of meeting the  
6  
7 physical activity recommendations was lower in women with FIQ  $\geq 70$  (OR: 0.690, 95%CI:  
8  
9 0.294-1.620, P=0.395). The findings persisted when another suggested FIQ threshold (>59 vs.  
10  
11  $\geq 59$ ) was used<sup>33</sup> (data not shown). Women spent on average 71% of their waking time  
12  
13 (approximately 10 hours/day) in sedentary behaviours. The results did not change after  
14  
15 adjusting for registered time (data not shown).  
16  
17

18  
19 Sedentary time and physical activity levels during weekdays (Monday to Friday) and  
20  
21 during weekend time (Saturday and Sunday) in women with fibromyalgia are shown in table  
22  
23 4. Mean levels of physical activity were lower during weekends compared with weekdays  
24  
25 (mean difference: 24 cpm, 95%CI: 7.8-40.2, P=0.004). Likewise, registered time at moderate-  
26  
27 intensity physical activity and MVPA was lower during weekends (mean difference: 10.5  
28  
29 min/day, 95%CI: 5.5-15.5, P<0.001; and 10.6 min/day, 95%CI: 5.5-15.6, P<0.001),  
30  
31 respectively). Mean levels of sedentary time were also lower during weekends (mean  
32  
33 difference: 22.6 min/day, 95%CI: 0-45.3, P=0.051). Figure 1 shows the sedentary time and  
34  
35 physical activity mean time by week and weekend days.  
36  
37  
38  
39  
40  
41  
42  
43  
44  
45  
46  
47  
48  
49  
50  
51  
52  
53  
54  
55  
56  
57  
58  
59  
60



## DISCUSSION

The main purpose of the present study was to characterize levels of sedentary time and physical activity in women with diagnosed fibromyalgia as well as to describe the adherence to recommended levels of physical activity assessed by accelerometry. Over half of the women (60.6%) met the physical activity recommendations (30 min/day of MVPA on 5 or more days a week). These women spent on average 71% (approximately 10 hours/day) of their waking time in sedentary behaviours, that is, in activities that expend little energy. We observed that both sedentary behaviour and physical activity levels were similar across the study demographic factors as well as regardless the severity of the disease. Women spent on average 10 min less on MVPA and 22 min less on sedentary behaviours during weekends compared with weekdays.

The present study showed that 60.6% of women met the recommendation to accumulate 30 or more min/day of physical activity of MVPA on most days of the week. The variation in meeting the recommendations was not associated with the study demographic factors, and despite the prevalence of meeting the recommendations tend to be lower in the oldest group, in the overweight group and in those with a higher waist circumference, in those with fibromyalgia being diagnosed more than 5 years ago, and in the retired group, the associations were not statistically significant. Time spent at moderate-intensity physical activity and MVPA tended to be however lower in those with greater BMI (-6.6 min and -7 min, respectively, per BMI category increase, <25, 25-30, >30 kg/m<sup>2</sup>), which concur with studies in healthy adults<sup>29</sup>. This may have important health implications since obese female fibromyalgia patients seem to have higher levels of pain, anxiety and depression and worse quality of life, as well as lower functional capacity than their normal weight peers<sup>34</sup>.

Despite several attempts have been made to objectively quantify sedentary behaviours and physical activity levels in people with fibromyalgia<sup>12 13 35-38</sup>, to our knowledge, there are

1  
2  
3 no previous studies showing the prevalence of meeting the physical activity recommendations  
4  
5 in women with fibromyalgia, which hamper between study comparisons. Mcloughlin et al.<sup>13</sup>  
6  
7 measured physical activity with accelerometry in 26 female fibromyalgia patients aged  
8  
9 42.7±12 years, yet they did not show the prevalence of meeting the recommendations. They  
10  
11 showed however that time spent at moderate intensity using the same intensity threshold as  
12  
13 used in the present study<sup>31</sup> was 15±8 minutes/day which is on average ~35 minutes lower  
14  
15 (using the 51-75 years age group as a reference group) than the time observed in the present  
16  
17 study. Kaleth et al.<sup>12</sup> also measured physical activity with accelerometry in 30 fibromyalgia  
18  
19 patients (27 women), but unfortunately, they did not show physical activity estimates.  
20  
21 Kashikar-Zuck et al.<sup>38</sup> measured physical activity with accelerometry in a juvenile primary  
22  
23 fibromyalgia syndrome group of adolescents and showed that only 23% achieved 30  
24  
25 minutes/day of MVPA, and that only 1 patient achieved the recommended levels of physical  
26  
27 activity for their age, that is 60 minutes/day of MVPA<sup>20,21</sup>.

31  
32 Data coming from apparently healthy women showed lower rates of meeting the  
33  
34 recommendation than those observed in the present study<sup>28, 29, 39, 40</sup>. Hagströmer et al.<sup>29</sup>  
35  
36 reported that 48% of a representative sample of Swedish women accumulated 30 minutes/day  
37  
38 of MVPA, and data from the Canadian Health Measures Survey<sup>40</sup> showed that less than 5%  
39  
40 engaged in 30 minutes/day of MVPA at least 5 of 7 days. Similarly, findings from the  
41  
42 National Health and Nutritional Examination Survey (NHANES) 2003–2004 indicated that  
43  
44 less than 5% of a representative sample of women from U.S.<sup>28</sup> met the physical activity  
45  
46 recommendations, and 7% of U.S women met the physical activity recommendations in  
47  
48 2005–2006 (NHANES)<sup>39</sup>. Methodological procedures used to measure physical activity such  
49  
50 as number of valid days included in the analysis, exclusion of the first recording day to avoid  
51  
52 reactivity and criteria used to define compliance, may partially explain the observed  
53  
54 differences among studies. Whereas in our study all women had 7 valid days with at least 10  
55  
56  
57  
58  
59  
60

1  
2  
3 hours of registered time during waking hours, in the other studies participants with 4 valid  
4  
5 days were included in the study. Of note is that, for example, the NHANES 2003–2004 <sup>28</sup>  
6  
7 study included participants with just with one or more valid days when calculated population  
8  
9 adherence estimates. Besides the above-mentioned methodological difference, it cannot be  
10  
11 discarded however that cultural differences might also explain the observed discrepancies.  
12

13  
14 Sedentary behaviours refer to those activities that do not increase resting energy  
15  
16 expenditure substantially, that is, no more than 1.5 times resting energy expenditure <sup>41</sup>. These  
17  
18 activities involved sitting, reclining and lying down such as watching television, studying,  
19  
20 reading, etc. In the present study we observed that women spend on average 10 hours/day  
21  
22 (~71%) of their waking time in sedentary activities, which is similar to that observed in  
23  
24 Portuguese women <sup>42</sup>, and slightly higher than American and Swedish women (about 7-8  
25  
26 hours) <sup>29</sup>. McLoughlin et al. <sup>13</sup> also measured sedentary time with accelerometry, yet data are  
27  
28 not comparable with our study because they included sleeping time as a sedentary activity.  
29  
30 They reported that women with fibromyalgia spend 1,154±59 minutes/day at sedentary  
31  
32 behaviours, which together with the registered time in other physical activity intensities  
33  
34 summed ~1,440 min, which is a full day. We observed no association of sedentary time with  
35  
36 any of the study demographic factors, which concur with the Swedish study by Hagströmer et  
37  
38 al. <sup>29</sup>. Similarly, women with a higher severity of the disease (FIQ≥70) showed similar  
39  
40 sedentary patterns as those with a FIQ<70, which concur with the findings reported by  
41  
42 McLoughlin et al. <sup>13</sup>.  
43  
44  
45  
46

47  
48 In our study, women with fibromyalgia spend less time (~10 minutes/day) on MVPA  
49  
50 and on sedentary time (~22 minutes/day) during weekends compared with weekdays. These  
51  
52 findings are in agreement with the results reported by Cooper et al. <sup>43</sup>. The observed physical  
53  
54 activity reduction during weekends could be partially explained by a reduced transport-related  
55  
56 physical activity when commuting to or from work, whereas the reduction of sedentary time  
57  
58  
59  
60

1  
2  
3 could be due to a reduced work-related sitting time. More studies quantifying and  
4  
5 characterizing physical activity and sedentary patterns during weekends and weekdays are  
6  
7 needed.  
8

9  
10 The present study has several limitations. The cross-sectional design of our study does  
11  
12 not allow establishing any causal relationship. The sample is of convenience and includes the  
13  
14 known limitations of all non-probability samples, including less representativeness and  
15  
16 unknown levels of sampling error. Further studies involving randomly recruited patients with  
17  
18 fibromyalgia are needed. Of note is also the relatively low response rate (29%). We cannot  
19  
20 discard that women who accepted to participate in this study are those more aware of the  
21  
22 importance of having an active lifestyle, which may have influenced the results. It should also  
23  
24 be mentioned that the accelerometer underestimates physical activities that involve upper  
25  
26 body movement, those with minimal vertical displacement such as cycling, water-based  
27  
28 activities such as swimming, and it does not capture well the extra energy cost of load-bearing  
29  
30 activities, such as walking while carrying a backpack. Nevertheless, walking is the most  
31  
32 prevalent leisure-time physical activity among women with fibromyalgia<sup>15</sup>, and is likely the  
33  
34 type of activity they do at work and for transportation. We used the same cut-points for all  
35  
36 ages and BMI levels as has been done in previous studies<sup>28 29</sup>. Use of a single cut point for all  
37  
38 ages and BMI levels may however lead to an underestimate of moderate-intensity activity for  
39  
40 the older and heavier group by not accounting for the decline in exercise capacity with age  
41  
42 and weight. We do not present data on vigorous physical activity because the time spent at  
43  
44 this intensity ranged from 0 to 2 min (see table 1, subtract moderate intensity to MVPA). On  
45  
46 average, ~98% of the time spend at MVPA is moderate-intensity physical activity. This is  
47  
48 consistent with the available clinical knowledge on this population, and concur with data from  
49  
50 apparently healthy women from Sweden<sup>29</sup>. The observed low levels of vigorous physical  
51  
52 activity could also suggest that the cut point for this intensity was too high, thereby missing  
53  
54  
55  
56  
57  
58  
59  
60

1  
2  
3 many minutes of activity in our population that should have been classified as vigorous  
4  
5 physical activity. Unfortunately, we have no data on an age- and culturally-matched group of  
6  
7 healthy women, so that direct comparison cannot be made. Mcloughlin et al.<sup>13</sup> observed that  
8  
9 female fibromyalgia patients (n=26) were less active than a group of healthy women (n=26),  
10  
11 yet the healthy group was younger and had higher level of education than the patients group.  
12  
13 Despite the number of participants in the present study is relatively small, to date, this is the  
14  
15 largest series described in adults. We do not know whether these findings apply to men,  
16  
17 therefore, future studies should quantify both sedentary time and physical activity in this  
18  
19 group of patients. We<sup>44</sup> and others<sup>45</sup> observed gender differences in patients with  
20  
21 fibromyalgia, therefore studies focused on examining gender differences on sedentary time  
22  
23 and physical activity will provide further insights on whether preventive and interventions  
24  
25 strategies should be gender-specific.  
26  
27  
28

29  
30 One of the strengths of the present study was however the strict standardization of  
31  
32 methodology used to measure physical activity, and the fact that all women were compliant  
33  
34 with the measurements procedures. All women had 7 valid days with at least 10 hours of  
35  
36 registered time during waking hours. Indeed, the mean daily accelerometer wear time was  
37  
38  $14 \pm 1.8$  hours/day. We do not know whether women modified their habitual sedentary  
39  
40 behavior or physical activity during the days they were monitored despite they were advised  
41  
42 to keep on with their normal life. To avoid any kind of immediate reactivity, we removed  
43  
44 from the analysis the first day of monitoring.  
45  
46

47  
48 Modifiable lifestyle factors, such as physical activity, may have a great potential as a  
49  
50 public health instrument to prevent and contribute to the treatment of fibromyalgia.  
51  
52 Longitudinal studies are also needed to further understand the predictive value of sedentary  
53  
54 behaviours and physical activity over the course of the disease, and whether preventive  
55  
56 strategies should start at the early stages of the disease development. To have an objective  
57  
58

1  
2  
3 estimate of the patient's sedentary behaviour as well as the engagement in physical activity  
4  
5 could be used as a potential tool to increase the effectiveness of treatment approaches as well  
6  
7 as to reduce disability and enhance quality of life in people with fibromyalgia. Indeed,  
8  
9 Fontaine et al.<sup>46</sup> observed that accumulating 30 minutes of moderate-intensity physical  
10  
11 activity throughout the day produces clinically relevant changes in perceived physical  
12  
13 function and pain in previously minimally active adults with fibromyalgia.  
14  
15

16  
17 In summary, these data provide an objective measure of amount of time spent in  
18  
19 sedentary activities and in physical activity in women with fibromyalgia. These estimates can  
20  
21 be used for comparisons with other rheumatologic diseases, as baseline reference levels for  
22  
23 monitoring, and to assess the effectiveness of intervention strategies promoting physical  
24  
25 activity in women with fibromyalgia.  
26  
27

### 28 29 **Acknowledgments**

30  
31 The authors gratefully acknowledge all women for their collaboration. We also acknowledge  
32  
33 the AGRAFIM (association of fibromyalgia from Granada, southern Spain) members  
34  
35 involved in the fieldwork for their effort and great enthusiasm.  
36  
37

### 38 39 **Funding**

40  
41 This study was supported by the Consejería de Turismo, Comercio y Deporte (CTCD-  
42  
43 201000019242-TRA), the Spanish Ministry of Science and Innovation (I+D+I DEP2010-  
44  
45 15639, grants: BES-2009-013442, BES-2011-047133, RYC-2010-05957, RYC-2011-09011),  
46  
47 the Spanish Ministry of Education (AP-2009-3173 and AP2010-0963), Granada Research of  
48  
49 Excellence Initiative on Biohealth (GREIB), Campus BioTic, University of Granada, Spain  
50  
51 and the European University of Madrid, Escuela de Estudios Universitarios Real Madrid  
52  
53 (2010/04RM).  
54  
55  
56  
57

**Author contributions**

JRR: Conception and design of the study, data collection, statistical analysis and interpretation of data, drafting the article

VSJ: Data collection, interpretation of data, and revising the article critically for important intellectual content

FOP: Conception and design of the study, interpretation of data, and revising the article critically for important intellectual content

IAG: Data collection, interpretation of data, and revising the article critically for important intellectual content

DCM: Data collection, interpretation of data, and revising the article critically for important intellectual content

VAA: Conception and design of the study, data collection, interpretation of data, and revising the article critically for important intellectual content

ACB: Conception and design of the study, data collection, interpretation of data, and revising the article critically for important intellectual content

PF: Statistical analysis, interpretation of data, and revising the article critically for important intellectual content

DMI: Interpretation of data, and revising the article critically for important intellectual content

MDF: Conception and design of the study, data collection, interpretation of data, and revising the article critically for important intellectual content

**REFERENCES**

1. Bennett RM. Clinical manifestations and diagnosis of fibromyalgia. *Rheum Dis Clin North Am* 2009;35(2):215-32.
2. Wilson HD, Robinson JP, Turk DC. Toward the identification of symptom patterns in people with fibromyalgia. *Arthritis Rheum* 2009;61(4):527-34.
3. Branco JC, Bannwarth B, Failde I, et al. Prevalence of fibromyalgia: a survey in five European countries. *Semin Arthritis Rheum* 2010;39(6):448-53.
4. Thomas EN, Blotman F. Aerobic exercise in fibromyalgia: a practical review. *Rheumatol Int* 2010;30(9):1143-50.
5. Busch AJ, Webber SC, Brachaniec M, et al. Exercise therapy for fibromyalgia. *Curr Pain Headache Rep* 2011;15(5):358-67.
6. Kelley GA, Kelley KS, Hootman JM, et al. Exercise and global well-being in community-dwelling adults with fibromyalgia: a systematic review with meta-analysis. *BMC Public Health* 2010;10:198.
7. Hauser W, Klose P, Langhorst J, et al. Efficacy of different types of aerobic exercise in fibromyalgia syndrome: a systematic review and meta-analysis of randomised controlled trials. *Arthritis Res Ther* 2010;12(3):R79.
8. Brosseau L, Wells GA, Tugwell P, et al. Ottawa Panel evidence-based clinical practice guidelines for aerobic fitness exercises in the management of fibromyalgia: part 1. *Phys Ther* 2008;88(7):857-71.
9. Blair SN. Physical inactivity: the biggest public health problem of the 21st century. *Br J Sports Med* 2009;43(1):1-2.
10. Matthews CE, George SM, Moore SC, et al. Amount of time spent in sedentary behaviors and cause-specific mortality in US adults. *Am J Clin Nutr* 2012;95(2):437-45.



- 1  
2  
3 11. Thorp AA, Owen N, Neuhaus M, et al. Sedentary behaviors and subsequent health  
4  
5 outcomes in adults a systematic review of longitudinal studies, 1996-2011. *Am J Prev*  
6  
7 *Med* 2011;41(2):207-15.  
8  
9  
10 12. Kaleth AS, Ang DC, Chakr R, et al. Validity and reliability of community health activities  
11  
12 model program for seniors and short-form international physical activity questionnaire  
13  
14 as physical activity assessment tools in patients with fibromyalgia. *Disabil Rehabil*  
15  
16 2010;32(5):353-9.  
17  
18 13. McLoughlin MJ, Colbert LH, Stegner AJ, et al. Are women with fibromyalgia less  
19  
20 physically active than healthy women? *Med Sci Sports Exerc* 2011;43(5):905-12.  
21  
22  
23 14. Munguia-Izquierdo D, Legaz-Arrese A, Mannerkorpi K. Transcultural adaptation and  
24  
25 psychometric properties of a Spanish-language version of physical activity  
26  
27 instruments for patients with fibromyalgia. *Arch Phys Med Rehabil* 2011;92(2):284-  
28  
29 94.  
30  
31  
32 15. Mannerkorpi K, Hernelid C. Leisure Time Physical Activity Instrument and Physical  
33  
34 Activity at Home and Work Instrument. Development, face validity, construct validity  
35  
36 and test-retest reliability for subjects with fibromyalgia. *Disabil Rehabil*  
37  
38 2005;27(12):695-701.  
39  
40  
41 16. Mork PJ, Vasseljen O, Nilsen TI. Association between physical exercise, body mass  
42  
43 index, and risk of fibromyalgia: longitudinal data from the Norwegian Nord-  
44  
45 Trondelag Health Study. *Arthritis Care Res (Hoboken)* 2010;62(5):611-7.  
46  
47  
48 17. van Poppel MN, Chinapaw MJ, Mokkink LB, et al. Physical activity questionnaires for  
49  
50 adults: a systematic review of measurement properties. *Sports Med* 2010;40(7):565-  
51  
52 600.  
53  
54  
55  
56  
57  
58  
59  
60

- 1  
2  
3 18. Freedson P, Bowles HR, Troiano R, et al. Assessment of physical activity using wearable  
4  
5 monitors: recommendations for monitor calibration and use in the field. *Med Sci*  
6  
7 *Sports Exerc* 2012;44(1 Suppl 1):S1-4.  
8  
9  
10 19. Carbonell-Baeza A, Ruiz JR, Aparicio VA, et al. Land- and water-based exercise  
11  
12 intervention in women with fibromyalgia: the al-Andalus physical activity randomised  
13  
14 control trial. *BMC Musculoskelet Disord* 2012;13(1):18.  
15  
16  
17 20. WHO. Global Recommendations on Physical Activity for Health. World Health Organ  
18  
19 publications. Geneva, Switzerland. 2010.  
20  
21 21. U.S. DEPARTMENT OF HEALTH AND HUMAN SERVICES. Physical Activity and  
22  
23 Health: A Report of the Surgeon General. Atlanta.GA: U.S. Department of Health and  
24  
25 Human Services, Centres for Disease Control and Prevention, National Centre for  
26  
27 Chronic Disease Prevention and Health Promotion.  
28  
29 (<http://www.cdc.gov/nccdphp/sgr/sgr.htm>, accessed 11 March 2008).  
30  
31  
32 22. Wolfe F, Smythe HA, Yunus MB, et al. The American College of Rheumatology 1990  
33  
34 Criteria for the Classification of Fibromyalgia. Report of the Multicenter Criteria  
35  
36 Committee. *Arthritis Rheum* 1990;33(2):160-72.  
37  
38  
39 23. Cardinal BJ, Esters J, Cardinal MK. Evaluation of the revised physical activity readiness  
40  
41 questionnaire in older adults. *Med Sci Sports Exerc* 1996;28(4):468-72.  
42  
43  
44 24. Rodriguez FA. Spanish version of the Physical Activity Readiness Questionnaire (C-  
45  
46 AAF/rPAR-Q)]. *Arch Med Deporte* 1996;13(51):63-68.  
47  
48  
49 25. Rivera J, Gonzalez T. The Fibromyalgia Impact Questionnaire: a validated Spanish  
50  
51 version to assess the health status in women with fibromyalgia. *Clin Exp Rheumatol*  
52  
53 2004;22(5):554-60.  
54  
55 26. Burckhardt CS, Clark SR, Bennett RM. The fibromyalgia impact questionnaire:  
56  
57 development and validation. *J Rheumatol* 1991;18(5):728-33.  
58  
59  
60

- 1  
2  
3 27. von Elm E, Altman DG, Egger M, et al. The Strengthening the Reporting of Observational  
4  
5 Studies in Epidemiology (STROBE) statement: guidelines for reporting observational  
6  
7 studies. *Ann Intern Med* 2007;147(8):573-7.  
8  
9  
10 28. Troiano RP, Berrigan D, Dodd KW, et al. Physical activity in the United States measured  
11  
12 by accelerometer. *Med Sci Sports Exerc* 2008;40(1):181-8.  
13  
14 29. Hagstromer M, Oja P, Sjostrom M. Physical activity and inactivity in an adult population  
15  
16 assessed by accelerometry. *Med Sci Sports Exerc* 2007;39(9):1502-8.  
17  
18 30. Matthews CE, Chen KY, Freedson PS, et al. Amount of time spent in sedentary behaviors  
19  
20 in the United States, 2003-2004. *Am J Epidemiol* 2008;167(7):875-81.  
21  
22 31. Freedson PS, Melanson E, Sirard J. Calibration of the Computer Science and  
23  
24 Applications, Inc. accelerometer. *Med Sci Sports Exerc* 1998;30(5):777-81.  
25  
26 32. Bennett R. The Fibromyalgia Impact Questionnaire (FIQ): a review of its development,  
27  
28 current version, operating characteristics and uses. *Clin Exp Rheumatol* 2005;23(5  
29  
30 Suppl 39):S154-62.  
31  
32 33. Bennett RM, Bushmakina AG, Cappelleri JC, et al. Minimal clinically important difference  
33  
34 in the fibromyalgia impact questionnaire. *J Rheumatol* 2009;36(6):1304-11.  
35  
36 34. Aparicio VA, Ortega FB, Carbonell-Baeza A, et al. Relationship of weight status with  
37  
38 mental and physical health in female fibromyalgia patients. *Obes Facts*  
39  
40 2011;4(6):443-8.  
41  
42 35. Kop WJ, Lyden A, Berlin AA, et al. Ambulatory monitoring of physical activity and  
43  
44 symptoms in fibromyalgia and chronic fatigue syndrome. *Arthritis Rheum*  
45  
46 2005;52(1):296-303.  
47  
48 36. Korszun A, Young EA, Engleberg NC, et al. Use of actigraphy for monitoring sleep and  
49  
50 activity levels in patients with fibromyalgia and depression. *J Psychosom Res*  
51  
52 2002;52(6):439-43.  
53  
54  
55  
56  
57  
58  
59  
60

- 1  
2  
3 37. Ellingson LD, Shields MR, Stegner AJ, et al. Physical activity, sustained sedentary  
4  
5 behavior, and pain modulation in women with fibromyalgia. *J Pain* 2012;13(2):195-  
6  
7 206.  
8  
9  
10 38. Kashikar-Zuck S, Flowers SR, Verkamp E, et al. Actigraphy-based physical activity  
11  
12 monitoring in adolescents with juvenile primary fibromyalgia syndrome. *J Pain*  
13  
14 2010;11(9):885-93.  
15  
16 39. Tucker JM, Welk GJ, Beyler NK. Physical activity in U.S.: adults compliance with the  
17  
18 Physical Activity Guidelines for Americans. *Am J Prev Med* 2011;40(4):454-61.  
19  
20  
21 40. Colley RC, Garriguet D, Janssen I, et al. Physical activity of Canadian adults:  
22  
23 accelerometer results from the 2007 to 2009 Canadian Health Measures Survey.  
24  
25 *Health reports / Statistics Canada, Canadian Centre for Health Information =*  
26  
27 *Rapports sur la sante / Statistique Canada, Centre canadien d'information sur la sante*  
28  
29 2011;22(1):7-14.  
30  
31  
32 41. Pate RR, O'Neill JR, Lobelo F. The evolving definition of "sedentary". *Exerc Sport Sci*  
33  
34 *Rev* 2008;36(4):173-8.  
35  
36 42. Baptista F, Santos DA, Silva AM, et al. Prevalence of the Portuguese population attaining  
37  
38 sufficient physical activity. *Med Sci Sports Exerc* 2012;44(3):466-73.  
39  
40  
41 43. Cooper AR, Page A, Fox KR, et al. Physical activity patterns in normal, overweight and  
42  
43 obese individuals using minute-by-minute accelerometry. *Eur J Clin Nutr*  
44  
45 2000;54(12):887-94.  
46  
47 44. Aparicio VA, Ortega FB, Carbonell-Baeza A, et al. Are there gender differences in quality  
48  
49 of life and fibromyalgia symptomatology? *Am J Mens Health* In press.  
50  
51  
52 45. Miro E, Diener FN, Martinez MP, et al. [Fibromyalgia in men and women: comparison of  
53  
54 the main clinical symptoms]. *Psicothema* 2012;24(1):10-5.  
55  
56  
57  
58  
59  
60

1  
2  
3 46. Fontaine KR, Conn L, Clauw DJ. Effects of lifestyle physical activity on perceived  
4  
5 symptoms and physical function in adults with fibromyalgia: results of a randomized  
6  
7 trial. *Arthritis Res Ther* 2010;12(2):R55.  
8  
9  
10  
11  
12  
13  
14  
15  
16  
17  
18  
19  
20  
21  
22  
23  
24  
25  
26  
27  
28  
29  
30  
31  
32  
33  
34  
35  
36  
37  
38  
39  
40  
41  
42  
43  
44  
45  
46  
47  
48  
49  
50  
51  
52  
53  
54  
55  
56  
57  
58  
59  
60

For peer review only

**Table 1.** Sedentary time and physical activity levels in women with fibromyalgia, by age group, body mass index, waist circumference and percentage body fat category, years since clinical diagnosis, fibromyalgia impact, marital status, educational level and occupational status<sup>a</sup>.

|                                                            | Sedentary (hours/day) |      |          | Average PA (counts/minutes) |         |      | Moderate PA (min/day) |      |        | MVPA (min/day) |        |  |
|------------------------------------------------------------|-----------------------|------|----------|-----------------------------|---------|------|-----------------------|------|--------|----------------|--------|--|
|                                                            | N                     | Mean | 95% CI   | Mean                        | 95% CI  | Mean | 95% CI                | Mean | 95% CI | Mean           | 95% CI |  |
| Age groups (years)                                         |                       |      |          |                             |         |      |                       |      |        |                |        |  |
| 18-50                                                      | 41                    | 10.0 | 9.6 10.5 | 222                         | 196 248 | 51   | 43 59                 | 52   | 44 60  |                |        |  |
| 51-75                                                      | 52                    | 9.9  | 9.5 10.3 | 219                         | 195 242 | 50   | 43 58                 | 52   | 44 59  |                |        |  |
| P value                                                    |                       |      | 0.65     |                             | 0.86    |      | 0.96                  |      | 0.98   |                |        |  |
| Body mass index <sup>b</sup> category (kg/m <sup>2</sup> ) |                       |      |          |                             |         |      |                       |      |        |                |        |  |
| < 25                                                       | 29                    | 10.3 | 9.7 10.8 | 229                         | 199 260 | 56   | 47 65                 | 58   | 48 67  |                |        |  |
| 25-30                                                      | 34                    | 9.5  | 9.0 10.0 | 235                         | 207 263 | 53   | 44 61                 | 54   | 45 63  |                |        |  |
| > 30                                                       | 27                    | 10.1 | 9.6 10.7 | 195                         | 162 227 | 42   | 32 52                 | 43   | 33 54  |                |        |  |
| P for trend                                                |                       |      | 0.63     |                             | 0.14    |      | 0.056                 |      | 0.051  |                |        |  |
| Waist circumference category (cm)                          |                       |      |          |                             |         |      |                       |      |        |                |        |  |
| ≤80                                                        | 44                    | 10.2 | 9.7 10.6 | 233                         | 208 257 | 54   | 47 62                 | 56   | 48 64  |                |        |  |
| >80                                                        | 46                    | 9.7  | 9.3 10.2 | 209                         | 185 234 | 47   | 39 54                 | 48   | 40 56  |                |        |  |
| P value                                                    |                       |      | 0.157    |                             | 0.187   |      | 0.155                 |      | 0.139  |                |        |  |
| Body fat (%)                                               |                       |      |          |                             |         |      |                       |      |        |                |        |  |
| < 30                                                       | 13                    | 10.6 | 9.8 11.4 | 210                         | 164 256 | 48   | 34 63                 | 50   | 35 65  |                |        |  |
| ≥ 30                                                       | 76                    | 9.8  | 9.5 10.2 | 223                         | 204 242 | 51   | 45 57                 | 52   | 46 58  |                |        |  |
| P value                                                    |                       |      | 0.93     |                             | 0.605   |      | 0.709                 |      | 0.774  |                |        |  |
| Years since clinical diagnosis                             |                       |      |          |                             |         |      |                       |      |        |                |        |  |
| ≤ 5 years                                                  | 47                    | 9.9  | 9.5 10.3 | 224                         | 200 248 | 53   | 46 61                 | 54   | 47 62  |                |        |  |
| > 5 years                                                  | 45                    | 9.8  | 9.3 10.2 | 219                         | 194 244 | 49   | 41 56                 | 50   | 43 58  |                |        |  |
| P value                                                    |                       |      | 0.650    |                             | 0.765   |      | 0.420                 |      | 0.489  |                |        |  |
| Fibromyalgia severity (score) <sup>c</sup>                 |                       |      |          |                             |         |      |                       |      |        |                |        |  |
| < 70                                                       | 42                    | 9.9  | 9.4 10.3 | 226                         | 200 251 | 51   | 43 60                 | 53   | 45 61  |                |        |  |
| ≥ 70                                                       | 50                    | 10.0 | 9.6 10.5 | 215                         | 191 238 | 49   | 42 57                 | 50   | 43 58  |                |        |  |
| P value                                                    |                       |      | 0.632    |                             | 0.546   |      | 0.725                 |      | 0.636  |                |        |  |
| Marital status                                             |                       |      |          |                             |         |      |                       |      |        |                |        |  |

1  
2  
3  
4  
5  
6  
7  
8  
9  
10  
11  
12  
13  
14  
15  
16  
17  
18  
19  
20  
21  
22  
23  
24  
25  
26  
27  
28  
29  
30  
31  
32  
33  
34  
35  
36  
37  
38  
39  
40  
41  
42  
43  
44  
45  
46  
47  
48  
49

|                         |    |      |       |      |     |       |     |    |       |    |    |       |    |
|-------------------------|----|------|-------|------|-----|-------|-----|----|-------|----|----|-------|----|
| Married                 | 72 | 9.9  | 9.6   | 10.3 | 217 | 198   | 237 | 50 | 43    | 56 | 51 | 44    | 57 |
| Unmarried               | 22 | 10.0 | 9.4   | 10.7 | 229 | 194   | 264 | 54 | 43    | 65 | 56 | 44    | 67 |
| P value                 |    |      | 0.710 |      |     | 0.564 |     |    | 0.510 |    |    | 0.436 |    |
| Educational level       |    |      |       |      |     |       |     |    |       |    |    |       |    |
| Below university degree | 71 | 9.9  | 9.6   | 10.3 | 222 | 203   | 242 | 51 | 45    | 57 | 53 | 46    | 59 |
| University degree       | 22 | 10.2 | 9.5   | 10.8 | 218 | 182   | 253 | 50 | 39    | 61 | 51 | 40    | 63 |
| P value                 |    |      | 0.519 |      |     | 0.814 |     |    | 0.791 |    |    | 0.830 |    |
| Occupational status     |    |      |       |      |     |       |     |    |       |    |    |       |    |
| Working                 | 29 | 9.8  | 9.3   | 10.3 | 222 | 196   | 247 | 51 | 43    | 59 | 52 | 44    | 60 |
| Unemployed              | 41 | 10.1 | 9.6   | 10.7 | 236 | 205   | 266 | 55 | 45    | 64 | 57 | 47    | 66 |
| Retired                 | 24 | 10.0 | 9.3   | 10.6 | 197 | 163   | 232 | 45 | 34    | 56 | 46 | 35    | 57 |
| P value                 |    |      | 0.619 |      |     | 0.107 |     |    | 0.187 |    |    | 0.159 |    |

Abbreviations: CI, confidence interval; PA, physical activity; MVPA, moderate- to vigorous-intensity physical activity.

<sup>a</sup> Estimates and P values were adjusted for registered time.

<sup>b</sup> Weight (kg)/height (m)<sup>2</sup>.

<sup>c</sup> Assessed with the Fibromyalgia Impact Questionnaire.

Analyses were conducted with physical activity and sedentary outcome variables logarithmically transformed to obtain a normal distribution, yet crude values are presented in the table for easier interpretation.

**Table 2.** Prevalence of meeting the physical activity recommendations (30 min/day of moderate-to-vigorous-intensity physical activity) on at least 5 days a week.

|                                               | N  | %    | 95%CI |      | Frequency |
|-----------------------------------------------|----|------|-------|------|-----------|
| Age groups (years)                            |    |      |       |      |           |
| 18-50                                         | 41 | 68.3 | 51.9  | 81.9 | 28        |
| 51-75                                         | 52 | 53.8 | 39.5  | 67.8 | 28        |
| Body mass index category (kg/m <sup>2</sup> ) |    |      |       |      |           |
| < 25                                          | 29 | 65.5 | 45.7  | 82.1 | 19        |
| 25-30                                         | 34 | 67.6 | 49.5  | 82.6 | 23        |
| > 30                                          | 27 | 48.1 | 28.7  | 68.1 | 13        |
| Waist circumference category (cm)             |    |      |       |      |           |
| ≤80                                           | 44 | 68.2 | 52.4  | 81.4 | 30        |
| >80                                           | 46 | 54.3 | 39.0  | 69.1 | 25        |
| Body fat (%)                                  |    |      |       |      |           |
| < 30                                          | 13 | 61.5 | 31.6  | 86.1 | 8         |
| ≥ 30                                          | 76 | 61.8 | 50.0  | 72.8 | 47        |
| Years since clinical diagnosis                |    |      |       |      |           |
| ≤ 5 years                                     | 47 | 70.2 | 55.1  | 82.7 | 33        |
| > 5 years                                     | 45 | 53.3 | 37.9  | 68.3 | 24        |
| Fibromyalgia severity                         |    |      |       |      |           |
| < 70                                          | 42 | 66.7 | 50.5  | 80.4 | 28        |
| ≥ 70                                          | 50 | 58   | 43.2  | 71.8 | 29        |
| Marital status                                |    |      |       |      |           |
| Married                                       | 72 | 61.1 | 48.9  | 72.4 | 44        |
| Unmarried                                     | 22 | 59.1 | 36.4  | 79.3 | 13        |
| Educational level                             |    |      |       |      |           |
| Below university degree                       | 71 | 62.0 | 49.7  | 73.2 | 44        |
| University degree                             | 22 | 59.1 | 0.0   | 0.0  | 13        |
| Occupational status                           |    |      |       |      |           |
| Working                                       | 29 | 62.1 | 42.3  | 79.3 | 18        |
| Unemployed                                    | 41 | 68.3 | 51.9  | 81.9 | 28        |
| Retired                                       | 24 | 45.8 | 25.6  | 67.2 | 11        |
| All                                           | 94 | 60.6 | 52.5  | 73.2 | 57        |

Abbreviations: CI, confidence interval (expressed in %).

<sup>a</sup> Assessed with the Fibromyalgia Impact Questionnaire.



**Table 3.** Odds ratio (OR) and 95% confidence interval (CI) of meeting the physical activity recommendations (30 min/day of moderate-to-vigorous-intensity physical activity, 5 of 7 days) by age group, body mass index, waist circumference and percentage body fat category, years since clinical diagnosis, marital status, educational level and occupational status.

|                                               | OR    | 95% CI |       | P value |
|-----------------------------------------------|-------|--------|-------|---------|
| Age groups (years)                            |       |        |       |         |
| 18-50                                         | Ref.  |        |       |         |
| 51-75                                         | 0.542 | 0.231  | 1.273 | 0.160   |
| Body mass index category (kg/m <sup>2</sup> ) |       |        |       |         |
| > 30                                          | Ref.  |        |       |         |
| 25-30                                         | 2.252 | 0.794  | 6.385 | 0.127   |
| < 25                                          | 2.046 | 0.698  | 5.997 | 0.192   |
| Waist circumference category (cm)             |       |        |       |         |
| ≤80                                           | Ref.  |        |       |         |
| >80                                           | 0.556 | 0.235  | 1.312 | 0.180   |
| Body fat category (%)                         |       |        |       |         |
| < 30                                          | Ref.  |        |       |         |
| ≥ 30                                          | 0.987 | 0.297  | 3.309 | 0.983   |
| Years since clinical diagnosis                |       |        |       |         |
| ≤ 5 years                                     | Ref.  |        |       |         |
| > 5 years                                     | 0.485 | 0.206  | 1.142 | 0.098   |
| Fibromyalgia severity (score)*                |       |        |       |         |
| < 70                                          | Ref.  |        |       |         |
| ≥ 70                                          | 0.690 | 0.294  | 1.620 | 0.395   |
| Marital status                                |       |        |       |         |
| Married                                       | Ref.  |        |       |         |
| Unmarried                                     | 0.919 | 0.347  | 2.432 | 0.865   |
| Educational level                             |       |        |       |         |
| Below university degree                       | Ref.  |        |       |         |
| University degree                             | 0.886 | 0.334  | 2.351 | 0.809   |
| Occupational status                           |       |        |       |         |
| Retired                                       | Ref.  |        |       |         |
| Unemployed                                    | 2.545 | 0.902  | 7.187 | 0.078   |
| Working                                       | 1.934 | 0.645  | 5.803 | 0.239   |

Abbreviations: Ref., Reference group.

\* Assessed with the Fibromyalgia Impact Questionnaire.

**Table 4.** Sedentary time and physical activity levels during weekdays (Monday to Friday) and during weekends (Saturday and Sunday) in women with fibromyalgia.

|                         | Week  |      | Weekend |      | Difference |          |         |
|-------------------------|-------|------|---------|------|------------|----------|---------|
|                         | mean  | sd   | mean    | sd   | mean       | 95% CI   | P value |
| Sedentary (hours/day)   | 10.0  | 2.2  | 9.6     | 2.5  | 0.4        | 0.0 0.8  | 0.051   |
| Average PA (counts/min) | 225.1 | 88.5 | 201.0   | 98.0 | 24.0       | 7.8 40.2 | 0.004   |
| Moderate PA (min/day)   | 53.1  | 28.4 | 42.6    | 28.0 | 10.5       | 5.5 15.5 | <0.001  |
| MVPA (min/day)          | 54.3  | 29.1 | 43.8    | 29.7 | 10.6       | 5.5 15.6 | <0.001  |

Abbreviations: CI, confidence interval; PA, physical activity; MVPA, moderate-to-vigorous-intensity physical activity; sd, Standard deviation.

Analyses were conducted with physical activity and sedentary outcome variables logarithmically transformed to obtain a normal distribution, yet crude values are presented in the table for easier interpretation.

1  
2  
3  
4  
5  
6  
7  
8  
9  
10  
11  
12  
13  
14  
15  
16  
17  
18  
19  
20  
21  
22  
23  
24  
25  
26  
27  
28  
29  
30  
31  
32  
33  
34  
35  
36  
37  
38  
39  
40  
41  
42  
43  
44  
45  
46  
47  
48  
49  
50  
51  
52  
53  
54  
55  
56  
57  
58  
59  
60

**Figure legend**

**Figure 1.** Sedentary time and physical activity (PA) mean time by week and weekend days.

For peer review only

1  
2  
3  
4  
5  
6  
7 **Objectively measured sedentary time and physical activity in women with fibromyalgia;**

8  
9 **A cross-sectional study**

10  
11  
12  
13  
14  
15  
16 Jonatan R Ruiz<sup>1\*</sup>, Víctor Segura-Jiménez<sup>2</sup>, Francisco B Ortega<sup>1</sup>, Inmaculada C Álvarez-  
17 Gallardo<sup>1</sup>, Daniel Camiletti-Moirón<sup>2,3</sup>, Virginia A Aparicio<sup>2,3</sup>, Ana Carbonell-Baeza<sup>2,4</sup>, Pedro  
18 Femia<sup>5</sup>, Diego Munguía-Izquierdo<sup>6</sup>, Manuel Delgado-Fernández<sup>2</sup>  
19  
20  
21  
22  
23  
24  
25  
26

27 <sup>1</sup> PROFITH “PROmoting FITness and Health through physical activity” research group,  
28 Department of Physical Education and Sports, Faculty of Sport Sciences, University of  
29 Granada, Spain.  
30  
31  
32

33  
34 <sup>2</sup>Department of Physical Education and Sport, School of Sport Sciences, University of  
35 Granada, Granada, Spain  
36  
37

38 <sup>3</sup>Department of Physiology, School of Pharmacy, University of Granada, Granada, Spain  
39

40 <sup>4</sup>Department of Physical Education, School of Education, University of Cadiz, Cadiz, Spain  
41  
42

43 <sup>5</sup>Department of Biostatistics, School of Medicine, University of Granada, Granada, Spain  
44

45 <sup>6</sup>Department of Sports and Informatics. Section of Physical education and Sports. Faculty of  
46 Sport. University Pablo de Olavide, Seville, Spain  
47  
48

49 **\*Address for correspondence:** Jonatan R. Ruiz, PhD. Department of Physical Education and  
50 Sport, School of Sport Sciences. University of Granada, Granada, Spain; [ruizj@ugr.es](mailto:ruizj@ugr.es)  
51  
52  
53  
54  
55  
56  
57  
58  
59  
60

## ARTICLE SUMMARY

### Article focus:

- To characterize the levels of objectively measured sedentary time and physical activity (using accelerometry) in women with fibromyalgia.
- To provide estimates of the adherence to recommended levels of physical activity assessed by accelerometry (30 minutes of moderate-to-vigorous-intensity physical activity on 5 of 7 days).

### Key Messages

- Over 60% of women with fibromyalgia meet the physical activity recommendations, that is, 30 min/day of moderate-to-vigorous-intensity physical activity on 5 or more days a week.
- These women spent about 71% (approximately 10 hours/day) of their waking time in activities that expend little energy.
- Women with fibromyalgia spent on average 10 min less of moderate-to-vigorous-intensity physical activity and 22 min less of sedentary behaviours during weekends compared with weekdays.

### Strengths and Limitations

- Strict standardization of the methodology used to measure physical activity and the fact that all women were compliant with the measurements procedures is a strength.
- All women had 7 valid days with at least 10 hours of registered time during waking hours.
- To avoid any kind of immediate reactivity, we removed from the analysis the first day of monitoring.

- 1  
2  
3  
4  
5  
6  
7  
8  
9  
10  
11  
12  
13  
14  
15  
16  
17  
18  
19  
20  
21  
22  
23  
24  
25  
26  
27  
28  
29  
30  
31  
32  
33  
34  
35  
36  
37  
38  
39  
40  
41  
42  
43  
44  
45  
46  
47  
48  
49  
50  
51  
52  
53  
54  
55  
56  
57  
58  
59  
60
- The cross-sectional design of our study does not allow however establishing any causal relationships. The sample is of convenience, which includes the known limitations of all non-probability samples.
  - The accelerometer underestimates physical activities that involve upper body movement, those with minimal vertical displacement such as cycling, water-based activities such as swimming. Moreover, it does not capture well the extra energy cost of load-bearing activities such as walking while carrying a backpack.

**ABSTRACT**

**Objectives:** To characterize levels of objectively measured sedentary time and physical activity in women with fibromyalgia.

**Design:** Cross-sectional study.

**Setting:** Local Association of Fibromyalgia (Granada, Spain).

**Participants:** The study comprised 94 women with diagnosed fibromyalgia who did not have other severe somatic or psychiatric disorders, or other diseases that prevent physical loading, able to ambulate and to communicate, and capable and willing to provide informed consent.

**Primary outcome measures:** Sedentary time and physical activity was measured by accelerometry and was expressed as time spent in sedentary behaviours, **average physical activity intensity** (counts/minute) and amount of time (minutes/day) spent in moderate-intensity and in moderate-to vigorous-intensity physical activity (MVPA).

**Results:** The proportion of women meeting the physical activity recommendations of 30 min/day of MVPA on 5 or more days a week was 60.6%. Women spent on average 71% of their waking time (approximately 10 hours/day) in sedentary behaviours. Both sedentary behaviour and physical activity levels were similar across age groups, waist circumference and percentage body fat categories, years since clinical diagnosis, marital status, educational level, occupational status, as well as regardless the severity of the disease (all  $P > 0.1$ ). Time spent at moderate-intensity physical activity and MVPA was however lower in those with greater BMI (-6.6 min and -7 min respectively, per BMI category increase, <25, 25-30, >30 kg/m<sup>2</sup>; P values for trend were 0.056 and 0.051 respectively). Women spent on average 10 min less on MVPA ( $P < 0.001$ ) and 22 min less on sedentary behaviours during weekends compared with weekdays ( $P = 0.051$ ).

**Conclusions:** These data provide an objective measure of the amount of time spent in sedentary activities and in physical activity in women with fibromyalgia.

1  
2  
3 Extra data is available by emailing [ruizj@ugr.es](mailto:ruizj@ugr.es)  
4  
5  
6  
7  
8  
9  
10  
11  
12  
13  
14  
15  
16  
17  
18  
19  
20  
21  
22  
23  
24  
25  
26  
27  
28  
29  
30  
31  
32  
33  
34  
35  
36  
37  
38  
39  
40  
41  
42  
43  
44  
45  
46  
47  
48  
49  
50  
51  
52  
53  
54  
55  
56  
57  
58  
59  
60

For peer review only



## INTRODUCTION

Fibromyalgia is a pain regulation-related disorder <sup>1</sup>. Patients usually present an increased sensitivity to painful stimuli (hyperalgesia) and lowered pain threshold (allodynia). In addition to pain, fibromyalgia symptoms typically include severe fatigue, sleep disturbances, paresthesia of extremities, depression, anxiety, joint stiffness, and memory and cognitive difficulties <sup>1 2</sup>. Fibromyalgia is becoming a common syndrome in Western European countries, and estimates indicate a point prevalence of 2.9% which translates to approximately 6 million people with fibromyalgia <sup>3</sup>.

There is increasing evidence about the potential benefits of regular physical activity on fibromyalgia-related symptoms <sup>4-7</sup>, and International organizations supports the use of physical activity-based interventions as a complementary tool in the therapeutic armamentarium against fibromyalgia <sup>8</sup>. Physical inactivity is one of the major public health problems of the 21<sup>st</sup> century <sup>9</sup>, and several longitudinal studies showed the negative consequences for health of a sedentary lifestyle <sup>10 11</sup>.

The average amount of daily sedentary time as well as physical activity in women with fibromyalgia is rather unknown, and the available information is mainly questionnaire-based <sup>12-16</sup>. However, physical activities are difficult to recall, quantify and categorize <sup>17</sup>, and it might be even more complex in people with memory and cognitive difficulties such as fibromyalgia patients <sup>14</sup>. Given the limitations of self-report methods, accelerometry (i.e. movement sensors) has become the method of choice for objectively measuring physical activity in free-living conditions <sup>18</sup>. To have an objective diagnosis of the sedentary time as well as of the physical activity levels in patients with fibromyalgia is of public health and of clinical interest, and might be informative for developing intervention studies directed to the promotion of physical activity in women with fibromyalgia <sup>19</sup>.

1  
2  
3 The purpose of the present study was to characterize the levels of objectively  
4 measured (using accelerometry) sedentary time and physical activity among women with  
5 fibromyalgia, and to provide estimates of the adherence to recommended levels of physical  
6 activity [30 minutes of moderate-to-vigorous-intensity physical activity (MVPA) on 5 of 7  
7 days] <sup>20 21</sup> .  
8  
9  
10  
11  
12  
13  
14  
15  
16  
17  
18  
19  
20  
21  
22  
23  
24  
25  
26  
27  
28  
29  
30  
31  
32  
33  
34  
35  
36  
37  
38  
39  
40  
41  
42  
43  
44  
45  
46  
47  
48  
49  
50  
51  
52  
53  
54  
55  
56  
57  
58  
59  
60

For peer review only

## MATERIAL AND METHODS

### Study participants

We sent a formal invitation to participate in the study to all members (n=400) of a Local Association of Fibromyalgia (Granada, Spain). A total of 116 patients responded (response rate 29%), and gave their written informed consent after receiving detailed information about the aims and study procedures. Participants were included in the study if: (i) they met the diagnosis of fibromyalgia according to the American College of Rheumatology criteria<sup>22</sup> (widespread pain for more than 3 months, and pain with 4 kg/cm<sup>2</sup> of pressure reported for 11 or more of 18 tender points), (ii) did not have other severe somatic or psychiatric disorders, or other diseases that prevent physical loading (answer “no” to all questions on the Physical Activity Readiness Questionnaire-PAR-Q<sup>23 24</sup>), (iii) were able to ambulate and to communicate, (iv) and were capable and willing to provide informed consent. Men were not included in the study (n=6), and women with incomplete physical activity data (n=5) or technical errors in the instrument (n=11) were excluded. A final sample of 94 women with fibromyalgia participated in the study. Age, weight and height, and fibromyalgia severity (assessed by the fibromyalgia impact questionnaire, FIQ)<sup>25 26</sup> was similar between the included and excluded participants (all P>0.1). The study protocol was reviewed and approved by the Ethics Committee of the Hospital Virgen de las Nieves (Granada, Spain). The STROBE guidelines were followed during the course of the research<sup>27</sup>.

### Measurements

Women were interviewed in the Association of Fibromyalgia (Granada, Spain). They were asked to wear an accelerometer (Actigraph<sup>TM</sup> GT1M, Pensacola, FL, USA) for 9 consecutive days starting the same day they received the monitor. The accelerometer was carried over the whole day (24 hrs) except during water-based activities such as bathing or swimming.

1  
2  
3 Accelerometers were initialized as described by the manufacturer, and data were recorded in 5  
4 seconds epochs. Women wore the device on the lower back, secured with an elastic belt,  
5 underneath clothing, near to the center of gravity. The data were downloaded onto a computer  
6 using the manufacturer software. Data reduction, cleaning and analyses were performed using  
7 the MAHUFFE program (see [http://www.mrc-  
8 epid.cam.ac.uk/Research/Programmes/Programme\\_5/InDepth/Programme%20Downloads.  
9 html](http://www.mrc-epid.cam.ac.uk/Research/Programmes/Programme_5/InDepth/Programme%20Downloads.html)).  
10  
11  
12  
13  
14  
15  
16  
17

18 Monitor wearing time was calculated by subtracting the sleeping reported time  
19 (recorded through a diary) from the total registered time for the entire day (i.e. 1440 minutes).  
20 Bouts of 60 continuous minutes of 0 activity intensity counts were also excluded from the  
21 analysis, considering these periods as non-wearing time<sup>28</sup>. There was no allowance for any  
22 minute with counts between 0-100 in the non-wear periods. A recording of more than 20,000  
23 counts per minute (cpm) was considered as a potential malfunction of the accelerometer and  
24 the value was excluded from the analyses<sup>28 29</sup>. The first and last days of recording were not  
25 included in the analysis. A total of 7 days (full week) of recording with a minimum of 10 or  
26 more hours of registration per day was necessary to be included in the study analysis.  
27  
28  
29  
30  
31  
32  
33  
34  
35  
36  
37

38 Sedentary time was estimated as the amount of time accumulated below 100 cpm  
39 during periods of wear time<sup>30</sup>. Time spent being sedentary was expressed as total duration  
40 (hours/day). Physical activity levels were estimated as follows: (i) Average physical activity  
41 intensity was expressed as mean cpm, and is a measure of overall physical activity. We  
42 calculated mean cpm as the sum of total counts per day divided by the number of minutes of  
43 wear time in that day; finally calculating the average of all valid days (n=7). (ii) Time  
44 engaged in moderate physical activity. We calculated the time engaged in moderate-intensity  
45 physical activity based upon a standardized cut-off of 1952-5724 cpm<sup>29 31</sup>, where 1952 cpm  
46 corresponds to walking at 4 km/hour<sup>31</sup>. (iii) We also calculated the time engaged in MVPA as  
47  
48  
49  
50  
51  
52  
53  
54  
55  
56  
57  
58  
59  
60

1  
2  
3 the amount of time accumulated  $\geq 1952$  cpm. Sedentary time, as well as the study physical  
4  
5 activity variables was calculated for weekdays and weekends. We calculated the proportion of  
6  
7 women meeting the physical activity recommendations, that is 30 minutes/day of MVPA at  
8  
9 least 5 of 7 days<sup>20 21</sup>.

10  
11 Weight and height were measured following standard procedures with a scale (InBody  
12  
13 720, Biospace, Seoul, Korea) and a stadiometer (Seca 22, Hamburg, Germany) respectively,  
14  
15 and body mass index (BMI, weight in kg divided by height in m<sup>2</sup>) was calculated. Percentage  
16  
17 body fat was measured with bioelectrical impedance analysis (InBody R20; Biospace,  
18  
19 Gateshead, UK). Waist circumference was measured at the level of the umbilicus with an  
20  
21 anthropometric un-elastic tape (Harpenden anthropometric tape Holtain Ltd). Weight status  
22  
23 groups were based on standard clinical definitions for BMI (normal weight: 18.5-24.9 kg/m<sup>2</sup>,  
24  
25 overweight: 25.0-29.9 kg/m<sup>2</sup>, obese: 30.0 kg/m<sup>2</sup> or higher); percentage body fat (normal:  
26  
27 <30%; obese:  $\geq 30\%$ ); and waist circumference (normal:  $\leq 80.0$  cm; abdominal obesity:  $> 80$   
28  
29 cm). One woman had a BMI below 18.5 kg/m<sup>2</sup> (18 kg/m<sup>2</sup>) and was included in the normal  
30  
31 weight group.  
32  
33  
34  
35

36 Fibromyalgia severity was assessed with the fibromyalgia impact questionnaire (FIQ)  
37  
38<sup>25 26</sup>. FIQ is composed of ten subscales: physical impairment, overall well-being, work missed,  
39  
40 job difficulty, pain, fatigue, morning tiredness, stiffness, anxiety and depression. The score of  
41  
42 each subscale was standardized from 0 to 10. We summed the score of all items, so that the  
43  
44 total score ranged from 0 to 100, with a higher score indicating greater severity. Women were  
45  
46 categorized into two groups based on the FIQ total score as FIQ  $< 70$  and FIQ  $\geq 70$ . These  
47  
48 thresholds corresponds with having moderate or severe fibromyalgia respectively<sup>32</sup>.  
49  
50  
51  
52  
53

#### 54 **Statistical analysis**

55  
56  
57  
58  
59  
60

1  
2  
3 All statistical analyses were performed with PASW (Predictive Analytics SoftWare, v. 18.0  
4 SPSS Inc., Chicago, IL, USA), and the level of significance was set at  $\alpha = 0.05$ . Physical  
5 activity and sedentary outcome variables were logarithmically transformed to obtain a normal  
6 distribution.  
7  
8  
9

10  
11 We calculated the estimated means of sedentary time, average physical activity  
12 intensity, moderate physical activity and MVPA by age group, BMI and waist circumference  
13 categories, years since clinical diagnosis, fibromyalgia severity, marital status, educational  
14 level and occupational status, after adjusting for registered time. Linear regression analysis  
15 was conducted to examine the association of sedentary time, average physical activity  
16 intensity, moderate-intensity physical activity and MVPA (inserted as dependent variables)  
17 with age group, BMI, waist circumference and percentage body fat categories, years since  
18 clinical diagnosis, fibromyalgia severity and educational level (inserted as independent  
19 variables). Independent variables were inserted as ordinal variables. As marital status and  
20 occupational status categories were not ordinal variables, we conducted one-way analysis of  
21 covariance to determine mean differences in sedentary time and physical activity levels  
22 among marital status and occupational status categories. Separate analyses were conducted for  
23 each dependent and independent variable. Registered time was entered as confounder in all  
24 models. Mean differences of sedentary time, physical activity, moderate physical activity and  
25 MVPA levels on week days (Monday to Friday) vs. weekend (Saturday and Sunday) were  
26 estimated with one-way analysis of variance for repeated measures.  
27  
28  
29  
30  
31  
32  
33  
34  
35  
36  
37  
38  
39  
40  
41  
42  
43  
44  
45  
46

47 We analysed the association of meeting the physical activity recommendations ( $\geq 30$   
48 minutes/day of MVPA on 5 of 7 days a week) with age, waist circumference and percentage  
49 body fat, years since clinical diagnosis, fibromyalgia severity, marital status, educational level  
50 and using binary logistic regression analysis. Multinomial regression analysis was conducted  
51  
52  
53  
54  
55  
56  
57  
58  
59  
60

1  
2  
3  
4  
5  
6  
7  
8  
9  
10  
11  
12  
13  
14  
15  
16  
17  
18  
19  
20  
21  
22  
23  
24  
25  
26  
27  
28  
29  
30  
31  
32  
33  
34  
35  
36  
37  
38  
39  
40  
41  
42  
43  
44  
45  
46  
47  
48  
49  
50  
51  
52  
53  
54  
55  
56  
57  
58  
59  
60

to examine the association of meeting the physical activity recommendations with BMI and occupational status categories.

For peer review only

## RESULTS

All participants had 7 valid days of registration. Mean registered time during waking time was 842±108 minutes/day (~14±1.8 hours). There was no significant association of sedentary time and physical activity with age group, waist circumference and percentage body fat categories, years since clinical diagnosis, fibromyalgia severity, marital status, educational level and occupational status (all  $P>0.1$ , Table 1). Levels of moderate-intensity physical activity and MVPA were lower in women with greater BMI ( $\hat{\beta} = -6.6\pm3.4$  and  $-7\pm3.6$  min respectively, per BMI category increase (i.e. 18.5-24.9 kg/m<sup>2</sup>, 25.0-29.9 kg/m<sup>2</sup>, and  $\geq 30.0$  kg/m<sup>2</sup>; P values for trend were 0.056 and 0.051 respectively, Table 1). Mean estimates of sedentary time and physical activity intensity levels were similar in women with FIQ <70 compared with those with FIQ  $\geq 70$  (all  $P>0.5$ , Table 1). For sensitivity analyses, we explored whether the association between physical activity intensity levels and FIQ differ when a different FIQ threshold (FIQ  $\geq 59$ )<sup>33</sup> was used, yet the findings persisted (data not shown).

The proportion of women meeting the physical activity recommendations by age group, BMI, waist circumference and percentage body fat categories, years since clinical diagnosis, fibromyalgia severity, marital status, educational level and occupational status are shown in Table 2. The proportion of women meeting the physical activity recommendations was 60.6% (n=57, 95%CI: 52.5-73.2%). The OR of meeting the physical activity recommendations were lower, yet not reaching statistical significance, in the oldest group (OR: 0.542, 95%CI: 0.231-1.237,  $P=0.160$ ), in those with a high waist circumference (OR: 0.556, 95%CI: 0.235-1.312,  $P=0.180$ ), and in those diagnosed with fibromyalgia more than 5 years ago (OR: 0.485, 95%CI: 0.206-1.142,  $P=0.098$ ) (Table 3). The OR of meeting the physical activity recommendations was higher, yet not reaching statistical significance, in non-overweight (BMI <25kg/m<sup>2</sup>) and in the overweight (BMI=25-30kg/m<sup>2</sup>) group compared with the obese peers (OR: 2.046, 95%CI: 0.698-5.997,  $P=0.192$ ; OR: 2.252, 95%CI: 0.794-



1  
2  
3 6.385, P=0.127) (Table 4). Unemployed women had also higher OR of meeting the  
4  
5 recommendations (OR: 2.545, 95%CI: 0.902-7.187, P=0.078). The OR of meeting the  
6  
7 physical activity recommendations was lower in women with FIQ  $\geq 70$  (OR: 0.690, 95%CI:  
8  
9 0.294-1.620, P=0.395). The findings persisted when another suggested FIQ threshold (>59 vs.  
10  
11  $\geq 59$ ) was used<sup>33</sup> (data not shown). Women spent on average 71% of their waking time  
12  
13 (approximately 10 hours/day) in sedentary behaviours. The results did not change after  
14  
15 adjusting for registered time (data not shown).  
16  
17

18  
19 Sedentary time and physical activity levels during weekdays (Monday to Friday) and  
20  
21 during weekend time (Saturday and Sunday) in women with fibromyalgia are shown in table  
22  
23 4. Mean levels of physical activity were lower during weekends compared with weekdays  
24  
25 (mean difference: 24 cpm, 95%CI: 7.8-40.2, P=0.004). Likewise, registered time at moderate-  
26  
27 intensity physical activity and MVPA was lower during weekends (mean difference: 10.5  
28  
29 min/day, 95%CI: 5.5-15.5, P<0.001; and 10.6 min/day, 95%CI: 5.5-15.6, P<0.001),  
30  
31 respectively). Mean levels of sedentary time were also lower during weekends (mean  
32  
33 difference: 22.6 min/day, 95%CI: 0-45.3, P=0.051). Figure 1 shows the sedentary time and  
34  
35 physical activity mean time by week and weekend days.  
36  
37  
38  
39  
40  
41  
42  
43  
44  
45  
46  
47  
48  
49  
50  
51  
52  
53  
54  
55  
56  
57  
58  
59  
60

## DISCUSSION

The main purpose of the present study was to characterize levels of sedentary time and physical activity in women with diagnosed fibromyalgia as well as to describe the adherence to recommended levels of physical activity assessed by accelerometry. Over half of the women (60.6%) met the physical activity recommendations (30 min/day of MVPA on 5 or more days a week). These women spent on average 71% (approximately 10 hours/day) of their waking time in sedentary behaviours, that is, in activities that expend little energy. We observed that both sedentary behaviour and physical activity levels were similar across the study demographic factors as well as regardless the severity of the disease. Women spent on average 10 min less on MVPA and 22 min less on sedentary behaviours during weekends compared with weekdays.

The present study showed that 60.6% of women met the recommendation to accumulate 30 or more min/day of physical activity of MVPA on most days of the week. The variation in meeting the recommendations was not associated with the study demographic factors, and despite the prevalence of meeting the recommendations tend to be lower in the oldest group, in the overweight group and in those with a higher waist circumference, in those with fibromyalgia being diagnosed more than 5 years ago, and in the retired group, the associations were not statistically significant. Time spent at moderate-intensity physical activity and MVPA tended to be however lower in those with greater BMI (-6.6 min and -7 min, respectively, per BMI category increase, <25, 25-30, >30 kg/m<sup>2</sup>), which concur with studies in healthy adults<sup>29</sup>. This may have important health implications since obese female fibromyalgia patients seem to have higher levels of pain, anxiety and depression and worse quality of life, as well as lower functional capacity than their normal weight peers<sup>34</sup>.

Despite several attempts have been made to objectively quantify sedentary behaviours and physical activity levels in people with fibromyalgia<sup>12 13 35-38</sup>, to our knowledge, there are

1  
2  
3 no previous studies showing the prevalence of meeting the physical activity recommendations  
4  
5 in women with fibromyalgia, which hamper between study comparisons. Mcloughlin et al.<sup>13</sup>  
6  
7 measured physical activity with accelerometry in 26 female fibromyalgia patients aged  
8  
9 42.7±12 years, yet they did not show the prevalence of meeting the recommendations. They  
10  
11 showed however that time spent at moderate intensity using the same intensity threshold as  
12  
13 used in the present study<sup>31</sup> was 15±8 minutes/day which is on average ~35 minutes lower  
14  
15 (using the 51-75 years age group as a reference group) than the time observed in the present  
16  
17 study. Kaleth et al.<sup>12</sup> also measured physical activity with accelerometry in 30 fibromyalgia  
18  
19 patients (27 women), but unfortunately, they did not show physical activity estimates.  
20  
21 Kashikar-Zuck et al.<sup>38</sup> measured physical activity with accelerometry in a juvenile primary  
22  
23 fibromyalgia syndrome group of adolescents and showed that only 23% achieved 30  
24  
25 minutes/day of MVPA, and that only 1 patient achieved the recommended levels of physical  
26  
27 activity for their age, that is 60 minutes/day of MVPA<sup>20,21</sup>.

31  
32 Data coming from apparently healthy women showed lower rates of meeting the  
33  
34 recommendation than those observed in the present study<sup>28, 29, 39, 40</sup>. Hagströmer et al.<sup>29</sup>  
35  
36 reported that 48% of a representative sample of Swedish women accumulated 30 minutes/day  
37  
38 of MVPA, and data from the Canadian Health Measures Survey<sup>40</sup> showed that less than 5%  
39  
40 engaged in 30 minutes/day of MVPA at least 5 of 7 days. Similarly, findings from the  
41  
42 National Health and Nutritional Examination Survey (NHANES) 2003–2004 indicated that  
43  
44 less than 5% of a representative sample of women from U.S.<sup>28</sup> met the physical activity  
45  
46 recommendations, and 7% of U.S women met the physical activity recommendations in  
47  
48 2005–2006 (NHANES)<sup>39</sup>. Methodological procedures used to measure physical activity such  
49  
50 as number of valid days included in the analysis, exclusion of the first recording day to avoid  
51  
52 reactivity and criteria used to define compliance, may partially explain the observed  
53  
54 differences among studies. Whereas in our study all women had 7 valid days with at least 10  
55  
56  
57  
58  
59  
60

1  
2  
3 hours of registered time during waking hours, in the other studies participants with 4 valid  
4 days were included in the study. Of note is that, for example, the NHANES 2003–2004<sup>28</sup>  
5 study included participants with just with one or more valid days when calculated population  
6 adherence estimates. Besides the above-mentioned methodological difference, it cannot be  
7 discarded however that cultural differences might also explain the observed discrepancies.  
8  
9

10  
11  
12  
13  
14 Sedentary behaviours refer to those activities that do not increase resting energy  
15 expenditure substantially, that is, no more than 1.5 times resting energy expenditure<sup>41</sup>. These  
16 activities involved sitting, reclining and lying down such as watching television, studying,  
17 reading, etc. In the present study we observed that women spend on average 10 hours/day  
18 (~71%) of their waking time in sedentary activities, which is similar to that observed in  
19 Portuguese women<sup>42</sup>, and slightly higher than American and Swedish women (about 7-8  
20 hours)<sup>29</sup>. McLoughlin et al.<sup>13</sup> also measured sedentary time with accelerometry, yet data are  
21 not comparable with our study because they included sleeping time as a sedentary activity.  
22 They reported that women with fibromyalgia spend 1,154±59 minutes/day at sedentary  
23 behaviours, which together with the registered time in other physical activity intensities  
24 summed ~1,440 min, which is a full day. We observed no association of sedentary time with  
25 any of the study demographic factors, which concur with the Swedish study by Hagströmer et  
26 al.<sup>29</sup>. Similarly, women with a higher severity of the disease (FIQ≥70) showed similar  
27 sedentary patterns as those with a FIQ<70, which concur with the findings reported by  
28 McLoughlin et al.<sup>13</sup>.  
29  
30  
31  
32  
33  
34  
35  
36  
37  
38  
39  
40  
41  
42  
43  
44  
45  
46

47 In our study, women with fibromyalgia spend less time (~10 minutes/day) on MVPA  
48 and on sedentary time (~22 minutes/day) during weekends compared with weekdays. These  
49 findings are in agreement with the results reported by Cooper et al.<sup>43</sup>. The observed physical  
50 activity reduction during weekends could be partially explained by a reduced transport-related  
51 physical activity when commuting to or from work, whereas the reduction of sedentary time  
52  
53  
54  
55  
56  
57  
58  
59  
60

1  
2  
3 could be due to a reduced work-related sitting time. More studies quantifying and  
4  
5 characterizing physical activity and sedentary patterns during weekends and weekdays are  
6  
7 needed.  
8

9  
10 The present study has several limitations. The cross-sectional design of our study does  
11  
12 not allow establishing any causal relationship. The sample is of convenience and includes the  
13  
14 known limitations of all non-probability samples, including less representativeness and  
15  
16 unknown levels of sampling error. Further studies involving randomly recruited patients with  
17  
18 fibromyalgia are needed. Of note is also the relatively low response rate (29%). We cannot  
19  
20 discard that women who accepted to participate in this study are those more aware of the  
21  
22 importance of having an active lifestyle, which may have influenced the results. It should also  
23  
24 be mentioned that the accelerometer underestimates physical activities that involve upper  
25  
26 body movement, those with minimal vertical displacement such as cycling, water-based  
27  
28 activities such as swimming, and it does not capture well the extra energy cost of load-bearing  
29  
30 activities, such as walking while carrying a backpack. Nevertheless, walking is the most  
31  
32 prevalent leisure-time physical activity among women with fibromyalgia<sup>15</sup>, and is likely the  
33  
34 type of activity they do at work and for transportation. We used the same cut-points for all  
35  
36 ages and BMI levels as has been done in previous studies<sup>28 29</sup>. Use of a single cut point for all  
37  
38 ages and BMI levels may however lead to an underestimate of moderate-intensity activity for  
39  
40 the older and heavier group by not accounting for the decline in exercise capacity with age  
41  
42 and weight. We do not present data on vigorous physical activity because the time spent at  
43  
44 this intensity ranged from 0 to 2 min (see table 1, subtract moderate intensity to MVPA). On  
45  
46 average, ~98% of the time spend at MVPA is moderate-intensity physical activity. This is  
47  
48 consistent with the available clinical knowledge on this population, and concur with data from  
49  
50 apparently healthy women from Sweden<sup>29</sup>. The observed low levels of vigorous physical  
51  
52 activity could also suggest that the cut point for this intensity was too high, thereby missing  
53  
54  
55  
56  
57  
58  
59  
60

1  
2  
3 many minutes of activity in our population that should have been classified as vigorous  
4  
5 physical activity. Unfortunately, we have no data on an age- and culturally-matched group of  
6  
7 healthy women, so that direct comparison cannot be made. Mcloughlin et al.<sup>13</sup> observed that  
8  
9 female fibromyalgia patients (n=26) were less active than a group of healthy women (n=26),  
10  
11 yet the healthy group was younger and had higher level of education than the patients group.  
12  
13 Despite the number of participants in the present study is relatively small, to date, this is the  
14  
15 largest series described in adults. We do not know whether these findings apply to men,  
16  
17 therefore, future studies should quantify both sedentary time and physical activity in this  
18  
19 group of patients. We<sup>44</sup> and others<sup>45</sup> observed gender differences in patients with  
20  
21 fibromyalgia, therefore studies focused on examining gender differences on sedentary time  
22  
23 and physical activity will provide further insights on whether preventive and interventions  
24  
25 strategies should be gender-specific.  
26  
27  
28

29  
30 One of the strengths of the present study was however the strict standardization of  
31  
32 methodology used to measure physical activity, and the fact that all women were compliant  
33  
34 with the measurements procedures. All women had 7 valid days with at least 10 hours of  
35  
36 registered time during waking hours. Indeed, the mean daily accelerometer wear time was  
37  
38  $14 \pm 1.8$  hours/day. We do not know whether women modified their habitual sedentary  
39  
40 behavior or physical activity during the days they were monitored despite they were advised  
41  
42 to keep on with their normal life. To avoid any kind of immediate reactivity, we removed  
43  
44 from the analysis the first day of monitoring.  
45  
46

47  
48 Modifiable lifestyle factors, such as physical activity, may have a great potential as a  
49  
50 public health instrument to prevent and contribute to the treatment of fibromyalgia.  
51  
52 Longitudinal studies are also needed to further understand the predictive value of sedentary  
53  
54 behaviours and physical activity over the course of the disease, and whether preventive  
55  
56 strategies should start at the early stages of the disease development. To have an objective  
57  
58

1  
2  
3 estimate of the patient's sedentary behaviour as well as the engagement in physical activity  
4  
5 could be used as a potential tool to increase the effectiveness of treatment approaches as well  
6  
7 as to reduce disability and enhance quality of life in people with fibromyalgia. Indeed,  
8  
9 Fontaine et al.<sup>46</sup> observed that accumulating 30 minutes of moderate-intensity physical  
10  
11 activity throughout the day produces clinically relevant changes in perceived physical  
12  
13 function and pain in previously minimally active adults with fibromyalgia.  
14  
15

16  
17 In summary, these data provide an objective measure of amount of time spent in  
18  
19 sedentary activities and in physical activity in women with fibromyalgia. These estimates can  
20  
21 be used for comparisons with other rheumatologic diseases, as baseline reference levels for  
22  
23 monitoring, and to assess the effectiveness of intervention strategies promoting physical  
24  
25 activity in women with fibromyalgia.  
26  
27

### 28 29 30 **Acknowledgments**

31  
32 The authors gratefully acknowledge all women for their collaboration. We also acknowledge  
33  
34 the AGRAFIM (association of fibromyalgia from Granada, southern Spain) members  
35  
36 involved in the fieldwork for their effort and great enthusiasm.  
37  
38

### 39 40 41 **Funding**

42  
43 This study was supported by the Consejería de Turismo, Comercio y Deporte (CTCD-  
44  
45 201000019242-TRA), the Spanish Ministry of Science and Innovation (I+D+I DEP2010-  
46  
47 15639, grants: BES-2009-013442, BES-2011-047133, RYC-2010-05957, RYC-2011-09011),  
48  
49 the Spanish Ministry of Education (AP-2009-3173 and AP2010-0963), Granada Research of  
50  
51 Excellence Initiative on Biohealth (GREIB), Campus BioTic, University of Granada, Spain  
52  
53 and the European University of Madrid, Escuela de Estudios Universitarios Real Madrid  
54  
55 (2010/04RM).  
56  
57

### Author contributions

JRR: Conception and design of the study, data collection, statistical analysis and interpretation of data, drafting the article

VSJ: Data collection, interpretation of data, and revising the article critically for important intellectual content

FOP: Conception and design of the study, interpretation of data, and revising the article critically for important intellectual content

IAG: Data collection, interpretation of data, and revising the article critically for important intellectual content

DCM: Data collection, interpretation of data, and revising the article critically for important intellectual content

VAA: Conception and design of the study, data collection, interpretation of data, and revising the article critically for important intellectual content

ACB: Conception and design of the study, data collection, interpretation of data, and revising the article critically for important intellectual content

PF: Statistical analysis, interpretation of data, and revising the article critically for important intellectual content

DMI: Interpretation of data, and revising the article critically for important intellectual content

MDF: Conception and design of the study, data collection, interpretation of data, and revising the article critically for important intellectual content



## REFERENCES

1. Bennett RM. Clinical manifestations and diagnosis of fibromyalgia. *Rheum Dis Clin North Am* 2009;35(2):215-32.
2. Wilson HD, Robinson JP, Turk DC. Toward the identification of symptom patterns in people with fibromyalgia. *Arthritis Rheum* 2009;61(4):527-34.
3. Branco JC, Bannwarth B, Failde I, Abello Carbonell J, Blotman F, Spaeth M, et al. Prevalence of fibromyalgia: a survey in five European countries. *Semin Arthritis Rheum* 2010;39(6):448-53.
4. Thomas EN, Blotman F. Aerobic exercise in fibromyalgia: a practical review. *Rheumatol Int* 2010;30(9):1143-50.
5. Busch AJ, Webber SC, Brachaniec M, Bidonde J, Bello-Haas VD, Danyliw AD, et al. Exercise therapy for fibromyalgia. *Curr Pain Headache Rep* 2011;15(5):358-67.
6. Kelley GA, Kelley KS, Hootman JM, Jones DL. Exercise and global well-being in community-dwelling adults with fibromyalgia: a systematic review with meta-analysis. *BMC Public Health* 2010;10:198.
7. Hauser W, Klose P, Langhorst J, Moradi B, Steinbach M, Schiltenswolf M, et al. Efficacy of different types of aerobic exercise in fibromyalgia syndrome: a systematic review and meta-analysis of randomised controlled trials. *Arthritis Res Ther* 2010;12(3):R79.
8. Brosseau L, Wells GA, Tugwell P, Egan M, Wilson KG, Dubouloz CJ, et al. Ottawa Panel evidence-based clinical practice guidelines for aerobic fitness exercises in the management of fibromyalgia: part 1. *Phys Ther* 2008;88(7):857-71.
9. Blair SN. Physical inactivity: the biggest public health problem of the 21st century. *Br J Sports Med* 2009;43(1):1-2.

- 1  
2  
3  
4  
5  
6  
7  
8  
9  
10  
11  
12  
13  
14  
15  
16  
17  
18  
19  
20  
21  
22  
23  
24  
25  
26  
27  
28  
29  
30  
31  
32  
33  
34  
35  
36  
37  
38  
39  
40  
41  
42  
43  
44  
45  
46  
47  
48  
49  
50  
51  
52  
53  
54  
55  
56  
57  
58  
59  
60
10. Matthews CE, George SM, Moore SC, Bowles HR, Blair A, Park Y, et al. Amount of time spent in sedentary behaviors and cause-specific mortality in US adults. *Am J Clin Nutr* 2012;95(2):437-45.
  11. Thorp AA, Owen N, Neuhaus M, Dunstan DW. Sedentary behaviors and subsequent health outcomes in adults a systematic review of longitudinal studies, 1996-2011. *Am J Prev Med* 2011;41(2):207-15.
  12. Kaleth AS, Ang DC, Chakr R, Tong Y. Validity and reliability of community health activities model program for seniors and short-form international physical activity questionnaire as physical activity assessment tools in patients with fibromyalgia. *Disabil Rehabil* 2010;32(5):353-9.
  13. McLoughlin MJ, Colbert LH, Stegner AJ, Cook DB. Are women with fibromyalgia less physically active than healthy women? *Med Sci Sports Exerc* 2011;43(5):905-12.
  14. Munguia-Izquierdo D, Legaz-Arrese A, Mannerkorpi K. Transcultural adaptation and psychometric properties of a Spanish-language version of physical activity instruments for patients with fibromyalgia. *Arch Phys Med Rehabil* 2011;92(2):284-94.
  15. Mannerkorpi K, Hernelid C. Leisure Time Physical Activity Instrument and Physical Activity at Home and Work Instrument. Development, face validity, construct validity and test-retest reliability for subjects with fibromyalgia. *Disabil Rehabil* 2005;27(12):695-701.
  16. Mork PJ, Vasseljen O, Nilsen TI. Association between physical exercise, body mass index, and risk of fibromyalgia: longitudinal data from the Norwegian Nord-Trondelag Health Study. *Arthritis Care Res (Hoboken)* 2010;62(5):611-7.

- 1  
2  
3 17. van Poppel MN, Chinapaw MJ, Mokkink LB, van Mechelen W, Terwee CB. Physical  
4  
5 activity questionnaires for adults: a systematic review of measurement properties.  
6  
7 *Sports Med* 2010;40(7):565-600.  
8
- 9  
10 18. Freedson P, Bowles HR, Troiano R, Haskell W. Assessment of physical activity using  
11  
12 wearable monitors: recommendations for monitor calibration and use in the field. *Med*  
13  
14 *Sci Sports Exerc* 2012;44(1 Suppl 1):S1-4.  
15
- 16  
17 19. Carbonell-Baeza A, Ruiz JR, Aparicio VA, Ortega FB, Munguia-Izquierdo D, Alvarez-  
18  
19 Gallardo IC, et al. Land- and water-based exercise intervention in women with  
20  
21 fibromyalgia: the al-Andalus physical activity randomised control trial. *BMC*  
22  
23 *Musculoskelet Disord* 2012;13(1):18.  
24
- 25  
26 20. WHO. Global Recommendations on Physical Activity for Health. World Health Organ  
27  
28 publications. Geneva, Switzerland. 2010.
- 29  
30 21. U.S. DEPARTMENT OF HEALTH AND HUMAN SERVICES. Physical Activity and  
31  
32 Health: A Report of the Surgeon General. Atlanta, GA: U.S. Department of Health and  
33  
34 Human Services, Centres for Disease Control and Prevention, National Centre for  
35  
36 Chronic Disease Prevention and Health Promotion.  
37  
38 (<http://www.cdc.gov/nccdphp/sgr/sgr.htm>, accessed 11 March 2008).  
39
- 40  
41 22. Wolfe F, Smythe HA, Yunus MB, Bennett RM, Bombardier C, Goldenberg DL, et al. The  
42  
43 American College of Rheumatology 1990 Criteria for the Classification of  
44  
45 Fibromyalgia. Report of the Multicenter Criteria Committee. *Arthritis Rheum*  
46  
47 1990;33(2):160-72.  
48
- 49  
50 23. Cardinal BJ, Esters J, Cardinal MK. Evaluation of the revised physical activity readiness  
51  
52 questionnaire in older adults. *Med Sci Sports Exerc* 1996;28(4):468-72.  
53
- 54  
55 24. Rodriguez FA. Spanish version of the Physical Activity Readiness Questionnaire (C-  
56  
57 AAF/rPAR-Q)]. *Arch Med Deporte* 1996;13(51):63-68.  
58  
59  
60

- 1  
2  
3 25. Rivera J, Gonzalez T. The Fibromyalgia Impact Questionnaire: a validated Spanish  
4  
5 version to assess the health status in women with fibromyalgia. *Clin Exp Rheumatol*  
6  
7 2004;22(5):554-60.  
8  
9  
10 26. Burckhardt CS, Clark SR, Bennett RM. The fibromyalgia impact questionnaire:  
11  
12 development and validation. *J Rheumatol* 1991;18(5):728-33.  
13  
14 27. von Elm E, Altman DG, Egger M, Pocock SJ, Gotsche PC, Vandenbroucke JP. The  
15  
16 Strengthening the Reporting of Observational Studies in Epidemiology (STROBE)  
17  
18 statement: guidelines for reporting observational studies. *Ann Intern Med*  
19  
20 2007;147(8):573-7.  
21  
22  
23 28. Troiano RP, Berrigan D, Dodd KW, Masse LC, Tilert T, McDowell M. Physical activity  
24  
25 in the United States measured by accelerometer. *Med Sci Sports Exerc*  
26  
27 2008;40(1):181-8.  
28  
29  
30 29. Hagstromer M, Oja P, Sjostrom M. Physical activity and inactivity in an adult population  
31  
32 assessed by accelerometry. *Med Sci Sports Exerc* 2007;39(9):1502-8.  
33  
34 30. Matthews CE, Chen KY, Freedson PS, Buchowski MS, Beech BM, Pate RR, et al.  
35  
36 Amount of time spent in sedentary behaviors in the United States, 2003-2004. *Am J*  
37  
38 *Epidemiol* 2008;167(7):875-81.  
39  
40  
41 31. Freedson PS, Melanson E, Sirard J. Calibration of the Computer Science and  
42  
43 Applications, Inc. accelerometer. *Med Sci Sports Exerc* 1998;30(5):777-81.  
44  
45 32. Bennett R. The Fibromyalgia Impact Questionnaire (FIQ): a review of its development,  
46  
47 current version, operating characteristics and uses. *Clin Exp Rheumatol* 2005;23(5  
48  
49 Suppl 39):S154-62.  
50  
51  
52 33. Bennett RM, Bushmakina AG, Cappelleri JC, Zlateva G, Sadosky AB. Minimal clinically  
53  
54 important difference in the fibromyalgia impact questionnaire. *J Rheumatol*  
55  
56 2009;36(6):1304-11.  
57  
58  
59  
60

- 1  
2  
3 34. Aparicio VA, Ortega FB, Carbonell-Baeza A, Camiletti D, Ruiz JR, Delgado-Fernandez  
4  
5 M. Relationship of weight status with mental and physical health in female  
6  
7 fibromyalgia patients. *Obes Facts* 2011;4(6):443-8.  
8  
9  
10 35. Kop WJ, Lyden A, Berlin AA, Ambrose K, Olsen C, Gracely RH, et al. Ambulatory  
11  
12 monitoring of physical activity and symptoms in fibromyalgia and chronic fatigue  
13  
14 syndrome. *Arthritis Rheum* 2005;52(1):296-303.  
15  
16 36. Korszun A, Young EA, Engleberg NC, Brucksch CB, Greden JF, Crofford LA. Use of  
17  
18 actigraphy for monitoring sleep and activity levels in patients with fibromyalgia and  
19  
20 depression. *J Psychosom Res* 2002;52(6):439-43.  
21  
22 37. Ellingson LD, Shields MR, Stegner AJ, Cook DB. Physical activity, sustained sedentary  
23  
24 behavior, and pain modulation in women with fibromyalgia. *J Pain* 2012;13(2):195-  
25  
26 206.  
27  
28 38. Kashikar-Zuck S, Flowers SR, Verkamp E, Ting TV, Lynch-Jordan AM, Graham TB, et  
29  
30 al. Actigraphy-based physical activity monitoring in adolescents with juvenile primary  
31  
32 fibromyalgia syndrome. *J Pain* 2010;11(9):885-93.  
33  
34  
35 39. Tucker JM, Welk GJ, Beyler NK. Physical activity in U.S.: adults compliance with the  
36  
37 Physical Activity Guidelines for Americans. *Am J Prev Med* 2011;40(4):454-61.  
38  
39 40. Colley RC, Garriguet D, Janssen I, Craig CL, Clarke J, Tremblay MS. Physical activity of  
40  
41 Canadian adults: accelerometer results from the 2007 to 2009 Canadian Health  
42  
43 Measures Survey. *Health reports / Statistics Canada, Canadian Centre for Health*  
44  
45 *Information = Rapports sur la sante / Statistique Canada, Centre canadien*  
46  
47 *d'information sur la sante* 2011;22(1):7-14.  
48  
49  
50 41. Pate RR, O'Neill JR, Lobelo F. The evolving definition of "sedentary". *Exerc Sport Sci*  
51  
52 *Rev* 2008;36(4):173-8.  
53  
54  
55  
56  
57  
58  
59  
60

- 1  
2  
3 42. Baptista F, Santos DA, Silva AM, Mota J, Santos R, Vale S, et al. Prevalence of the  
4  
5 Portuguese population attaining sufficient physical activity. *Med Sci Sports Exerc*  
6  
7 2012;44(3):466-73.  
8  
9  
10 43. Cooper AR, Page A, Fox KR, Misson J. Physical activity patterns in normal, overweight  
11  
12 and obese individuals using minute-by-minute accelerometry. *Eur J Clin Nutr*  
13  
14 2000;54(12):887-94.  
15  
16 44. Aparicio VA, Ortega FB, Carbonell-Baeza A, Tercedor P, Ruiz JR, Delgado-Fernandez  
17  
18 M. Are there gender differences in quality of life and fibromyalgia symptomatology?  
19  
20 *Am J Mens Health* In press.  
21  
22 45. Miro E, Diener FN, Martinez MP, Sanchez AI, Valenza MC. [Fibromyalgia in men and  
23  
24 women: comparison of the main clinical symptoms]. *Psicothema* 2012;24(1):10-5.  
25  
26  
27 46. Fontaine KR, Conn L, Clauw DJ. Effects of lifestyle physical activity on perceived  
28  
29 symptoms and physical function in adults with fibromyalgia: results of a randomized  
30  
31 trial. *Arthritis Res Ther* 2010;12(2):R55.  
32  
33  
34  
35  
36  
37  
38  
39  
40  
41  
42  
43  
44  
45  
46  
47  
48  
49  
50  
51  
52  
53  
54  
55  
56  
57  
58  
59  
60

**Table 1.** Sedentary time and physical activity levels in women with fibromyalgia, by age group, body mass index, waist circumference and percentage body fat category, years since clinical diagnosis, fibromyalgia impact, marital status, educational level and occupational status<sup>a</sup>.

|                                                            | Sedentary (hours/day) |      |          | Average PA (counts/minutes) |         |      | Moderate PA (min/day) |      |        | MVPA (min/day) |        |  |
|------------------------------------------------------------|-----------------------|------|----------|-----------------------------|---------|------|-----------------------|------|--------|----------------|--------|--|
|                                                            | N                     | Mean | 95% CI   | Mean                        | 95% CI  | Mean | 95% CI                | Mean | 95% CI | Mean           | 95% CI |  |
| Age groups (years)                                         |                       |      |          |                             |         |      |                       |      |        |                |        |  |
| 18-50                                                      | 41                    | 10.0 | 9.6 10.5 | 222                         | 196 248 | 51   | 43 59                 | 52   | 44 60  |                |        |  |
| 51-75                                                      | 52                    | 9.9  | 9.5 10.3 | 219                         | 195 242 | 50   | 43 58                 | 52   | 44 59  |                |        |  |
| P value                                                    |                       |      | 0.65     |                             | 0.86    |      | 0.96                  |      | 0.98   |                |        |  |
| Body mass index <sup>b</sup> category (kg/m <sup>2</sup> ) |                       |      |          |                             |         |      |                       |      |        |                |        |  |
| < 25                                                       | 29                    | 10.3 | 9.7 10.8 | 229                         | 199 260 | 56   | 47 65                 | 58   | 48 67  |                |        |  |
| 25-30                                                      | 34                    | 9.5  | 9.0 10.0 | 235                         | 207 263 | 53   | 44 61                 | 54   | 45 63  |                |        |  |
| > 30                                                       | 27                    | 10.1 | 9.6 10.7 | 195                         | 162 227 | 42   | 32 52                 | 43   | 33 54  |                |        |  |
| P for trend                                                |                       |      | 0.63     |                             | 0.14    |      | 0.056                 |      | 0.051  |                |        |  |
| Waist circumference category (cm)                          |                       |      |          |                             |         |      |                       |      |        |                |        |  |
| ≤80                                                        | 44                    | 10.2 | 9.7 10.6 | 233                         | 208 257 | 54   | 47 62                 | 56   | 48 64  |                |        |  |
| >80                                                        | 46                    | 9.7  | 9.3 10.2 | 209                         | 185 234 | 47   | 39 54                 | 48   | 40 56  |                |        |  |
| P value                                                    |                       |      | 0.157    |                             | 0.187   |      | 0.155                 |      | 0.139  |                |        |  |
| Body fat (%)                                               |                       |      |          |                             |         |      |                       |      |        |                |        |  |
| < 30                                                       | 13                    | 10.6 | 9.8 11.4 | 210                         | 164 256 | 48   | 34 63                 | 50   | 35 65  |                |        |  |
| ≥ 30                                                       | 76                    | 9.8  | 9.5 10.2 | 223                         | 204 242 | 51   | 45 57                 | 52   | 46 58  |                |        |  |
| P value                                                    |                       |      | 0.93     |                             | 0.605   |      | 0.709                 |      | 0.774  |                |        |  |
| Years since clinical diagnosis                             |                       |      |          |                             |         |      |                       |      |        |                |        |  |
| ≤ 5 years                                                  | 47                    | 9.9  | 9.5 10.3 | 224                         | 200 248 | 53   | 46 61                 | 54   | 47 62  |                |        |  |
| > 5 years                                                  | 45                    | 9.8  | 9.3 10.2 | 219                         | 194 244 | 49   | 41 56                 | 50   | 43 58  |                |        |  |
| P value                                                    |                       |      | 0.650    |                             | 0.765   |      | 0.420                 |      | 0.489  |                |        |  |
| Fibromyalgia severity (score) <sup>c</sup>                 |                       |      |          |                             |         |      |                       |      |        |                |        |  |
| < 70                                                       | 42                    | 9.9  | 9.4 10.3 | 226                         | 200 251 | 51   | 43 60                 | 53   | 45 61  |                |        |  |
| ≥ 70                                                       | 50                    | 10.0 | 9.6 10.5 | 215                         | 191 238 | 49   | 42 57                 | 50   | 43 58  |                |        |  |
| P value                                                    |                       |      | 0.632    |                             | 0.546   |      | 0.725                 |      | 0.636  |                |        |  |
| Marital status                                             |                       |      |          |                             |         |      |                       |      |        |                |        |  |

|                         |    |      |       |      |     |       |     |    |       |    |    |       |    |
|-------------------------|----|------|-------|------|-----|-------|-----|----|-------|----|----|-------|----|
| Married                 | 72 | 9.9  | 9.6   | 10.3 | 217 | 198   | 237 | 50 | 43    | 56 | 51 | 44    | 57 |
| Unmarried               | 22 | 10.0 | 9.4   | 10.7 | 229 | 194   | 264 | 54 | 43    | 65 | 56 | 44    | 67 |
| P value                 |    |      | 0.710 |      |     | 0.564 |     |    | 0.510 |    |    | 0.436 |    |
| Educational level       |    |      |       |      |     |       |     |    |       |    |    |       |    |
| Below university degree | 71 | 9.9  | 9.6   | 10.3 | 222 | 203   | 242 | 51 | 45    | 57 | 53 | 46    | 59 |
| University degree       | 22 | 10.2 | 9.5   | 10.8 | 218 | 182   | 253 | 50 | 39    | 61 | 51 | 40    | 63 |
| P value                 |    |      | 0.519 |      |     | 0.814 |     |    | 0.791 |    |    | 0.830 |    |
| Occupational status     |    |      |       |      |     |       |     |    |       |    |    |       |    |
| Working                 | 29 | 9.8  | 9.3   | 10.3 | 222 | 196   | 247 | 51 | 43    | 59 | 52 | 44    | 60 |
| Unemployed              | 41 | 10.1 | 9.6   | 10.7 | 236 | 205   | 266 | 55 | 45    | 64 | 57 | 47    | 66 |
| Retired                 | 24 | 10.0 | 9.3   | 10.6 | 197 | 163   | 232 | 45 | 34    | 56 | 46 | 35    | 57 |
| P value                 |    |      | 0.619 |      |     | 0.107 |     |    | 0.187 |    |    | 0.159 |    |

Abbreviations: CI, confidence interval; PA, physical activity; MVPA, moderate- to vigorous-intensity physical activity.

<sup>a</sup> Estimates and P values were adjusted for registered time.

<sup>b</sup> Weight (kg)/height (m)<sup>2</sup>.

<sup>c</sup> Assessed with the Fibromyalgia Impact Questionnaire.

Analyses were conducted with physical activity and sedentary outcome variables logarithmically transformed to obtain a normal distribution, yet crude values are presented in the table for easier interpretation.



**Table 2.** Prevalence of meeting the physical activity recommendations (30 min/day of moderate-to-vigorous-intensity physical activity) on at least 5 days a week.

|                                               | N  | %    | 95%CI |      | Frequency |
|-----------------------------------------------|----|------|-------|------|-----------|
| Age groups (years)                            |    |      |       |      |           |
| 18-50                                         | 41 | 68.3 | 51.9  | 81.9 | 28        |
| 51-75                                         | 52 | 53.8 | 39.5  | 67.8 | 28        |
| Body mass index category (kg/m <sup>2</sup> ) |    |      |       |      |           |
| < 25                                          | 29 | 65.5 | 45.7  | 82.1 | 19        |
| 25-30                                         | 34 | 67.6 | 49.5  | 82.6 | 23        |
| > 30                                          | 27 | 48.1 | 28.7  | 68.1 | 13        |
| Waist circumference category (cm)             |    |      |       |      |           |
| ≤80                                           | 44 | 68.2 | 52.4  | 81.4 | 30        |
| >80                                           | 46 | 54.3 | 39.0  | 69.1 | 25        |
| Body fat (%)                                  |    |      |       |      |           |
| < 30                                          | 13 | 61.5 | 31.6  | 86.1 | 8         |
| ≥ 30                                          | 76 | 61.8 | 50.0  | 72.8 | 47        |
| Years since clinical diagnosis                |    |      |       |      |           |
| ≤ 5 years                                     | 47 | 70.2 | 55.1  | 82.7 | 33        |
| > 5 years                                     | 45 | 53.3 | 37.9  | 68.3 | 24        |
| Fibromyalgia severity                         |    |      |       |      |           |
| < 70                                          | 42 | 66.7 | 50.5  | 80.4 | 28        |
| ≥ 70                                          | 50 | 58   | 43.2  | 71.8 | 29        |
| Marital status                                |    |      |       |      |           |
| Married                                       | 72 | 61.1 | 48.9  | 72.4 | 44        |
| Unmarried                                     | 22 | 59.1 | 36.4  | 79.3 | 13        |
| Educational level                             |    |      |       |      |           |
| Below university degree                       | 71 | 62.0 | 49.7  | 73.2 | 44        |
| University degree                             | 22 | 59.1 | 0.0   | 0.0  | 13        |
| Occupational status                           |    |      |       |      |           |
| Working                                       | 29 | 62.1 | 42.3  | 79.3 | 18        |
| Unemployed                                    | 41 | 68.3 | 51.9  | 81.9 | 28        |
| Retired                                       | 24 | 45.8 | 25.6  | 67.2 | 11        |
| All                                           | 94 | 60.6 | 52.5  | 73.2 | 57        |

Abbreviations: CI, confidence interval (expressed in %).

<sup>a</sup> Assessed with the Fibromyalgia Impact Questionnaire.

**Table 3.** Odds ratio (OR) and 95% confidence interval (CI) of meeting the physical activity recommendations (30 min/day of moderate-to-vigorous-intensity physical activity, 5 of 7 days) by age group, body mass index, waist circumference and percentage body fat category, years since clinical diagnosis, marital status, educational level and occupational status.

|                                               | OR    | 95% CI |       | P value |
|-----------------------------------------------|-------|--------|-------|---------|
| Age groups (years)                            |       |        |       |         |
| 18-50                                         | Ref.  |        |       |         |
| 51-75                                         | 0.542 | 0.231  | 1.273 | 0.160   |
| Body mass index category (kg/m <sup>2</sup> ) |       |        |       |         |
| > 30                                          | Ref.  |        |       |         |
| 25-30                                         | 2.252 | 0.794  | 6.385 | 0.127   |
| < 25                                          | 2.046 | 0.698  | 5.997 | 0.192   |
| Waist circumference category (cm)             |       |        |       |         |
| ≤80                                           | Ref.  |        |       |         |
| >80                                           | 0.556 | 0.235  | 1.312 | 0.180   |
| Body fat category (%)                         |       |        |       |         |
| < 30                                          | Ref.  |        |       |         |
| ≥ 30                                          | 0.987 | 0.297  | 3.309 | 0.983   |
| Years since clinical diagnosis                |       |        |       |         |
| ≤ 5 years                                     | Ref.  |        |       |         |
| > 5 years                                     | 0.485 | 0.206  | 1.142 | 0.098   |
| Fibromyalgia severity (score)*                |       |        |       |         |
| < 70                                          | Ref.  |        |       |         |
| ≥ 70                                          | 0.690 | 0.294  | 1.620 | 0.395   |
| Marital status                                |       |        |       |         |
| Married                                       | Ref.  |        |       |         |
| Unmarried                                     | 0.919 | 0.347  | 2.432 | 0.865   |
| Educational level                             |       |        |       |         |
| Below university degree                       | Ref.  |        |       |         |
| University degree                             | 0.886 | 0.334  | 2.351 | 0.809   |
| Occupational status                           |       |        |       |         |
| Retired                                       | Ref.  |        |       |         |
| Unemployed                                    | 2.545 | 0.902  | 7.187 | 0.078   |
| Working                                       | 1.934 | 0.645  | 5.803 | 0.239   |

Abbreviations: Ref., Reference group.

\* Assessed with the Fibromyalgia Impact Questionnaire.

1  
2  
3  
4  
5  
6  
7  
8  
9  
10  
11  
12  
13  
14  
15  
16  
17  
18  
19  
20  
21  
22  
23  
24  
25  
26  
27  
28  
29  
30  
31  
32  
33  
34  
35  
36  
37  
38  
39  
40  
41  
42  
43  
44  
45  
46  
47  
48  
49

**Table 4.** Sedentary time and physical activity levels during weekdays (Monday to Friday) and during weekends (Saturday and Sunday) in women with fibromyalgia.

|                         | Week  |      | Weekend |      | Difference |          |         |
|-------------------------|-------|------|---------|------|------------|----------|---------|
|                         | mean  | sd   | mean    | sd   | mean       | 95% CI   | P value |
| Sedentary (hours/day)   | 10.0  | 2.2  | 9.6     | 2.5  | 0.4        | 0.0 0.8  | 0.051   |
| Average PA (counts/min) | 225.1 | 88.5 | 201.0   | 98.0 | 24.0       | 7.8 40.2 | 0.004   |
| Moderate PA (min/day)   | 53.1  | 28.4 | 42.6    | 28.0 | 10.5       | 5.5 15.5 | <0.001  |
| MVPA (min/day)          | 54.3  | 29.1 | 43.8    | 29.7 | 10.6       | 5.5 15.6 | <0.001  |

Abbreviations: CI, confidence interval; PA, physical activity; MVPA, moderate-to-vigorous-intensity physical activity; sd, Standard deviation. Analyses were conducted with physical activity and sedentary outcome variables logarithmically transformed to obtain a normal distribution, yet crude values are presented in the table for easier interpretation.

1  
2  
3 **Figure legend**  
4

5 **Figure 1.** Sedentary time and physical activity (PA) mean time by week and weekend days.  
6  
7  
8  
9  
10  
11  
12  
13  
14  
15  
16  
17  
18  
19  
20  
21  
22  
23  
24  
25  
26  
27  
28  
29  
30  
31  
32  
33  
34  
35  
36  
37  
38  
39  
40  
41  
42  
43  
44  
45  
46  
47  
48  
49  
50  
51  
52  
53  
54  
55  
56  
57  
58  
59  
60

For peer review only

1  
2  
3  
4  
5  
6  
7  
8  
9  
10  
11  
12  
13  
14  
15  
16  
17  
18  
19  
20  
21  
22  
23  
24  
25  
26  
27  
28  
29  
30  
31  
32  
33  
34  
35  
36  
37  
38  
39  
40  
41  
42  
43  
44  
45  
46  
47  
48  
49  
50  
51  
52  
53  
54  
55  
56  
57  
58  
59  
60

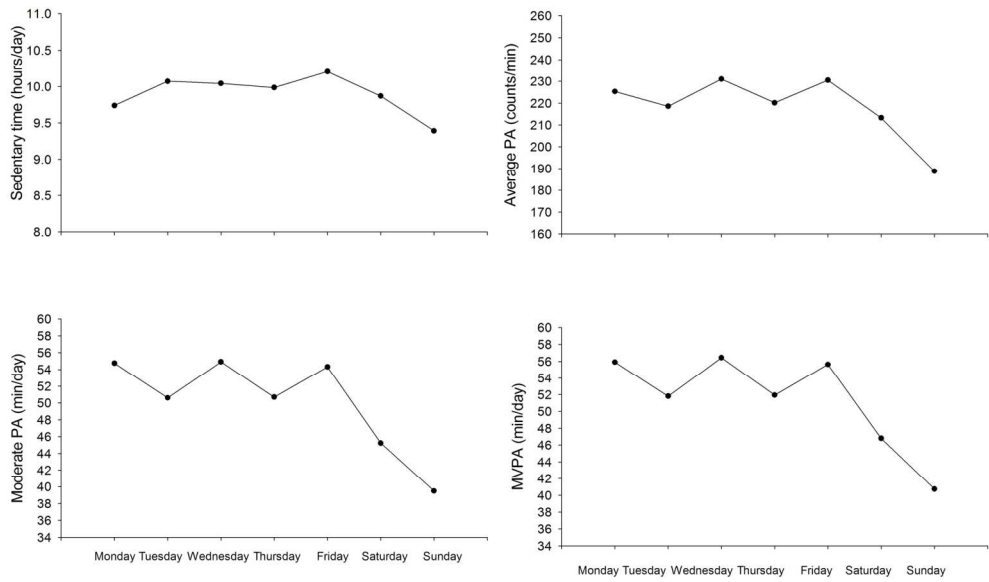

146x90mm (300 x 300 DPI)

Review only

**STROBE 2007 (v4) checklist of items to be included in reports of observational studies in epidemiology\***  
**Checklist for cohort, case-control, and cross-sectional studies (combined)**

| Section/Topic             | Item # | Recommendation                                                                                                                                                                                                                                                                                                                                                                                                                                                         | Reported on page # |
|---------------------------|--------|------------------------------------------------------------------------------------------------------------------------------------------------------------------------------------------------------------------------------------------------------------------------------------------------------------------------------------------------------------------------------------------------------------------------------------------------------------------------|--------------------|
| Title and abstract        | 1      | (a) Indicate the study's design with a commonly used term in the title or the abstract                                                                                                                                                                                                                                                                                                                                                                                 | 1                  |
|                           |        | (b) Provide in the abstract an informative and balanced summary of what was done and what was found                                                                                                                                                                                                                                                                                                                                                                    | 2                  |
| <b>Introduction</b>       |        |                                                                                                                                                                                                                                                                                                                                                                                                                                                                        |                    |
| Background/rationale      | 2      | Explain the scientific background and rationale for the investigation being reported                                                                                                                                                                                                                                                                                                                                                                                   | 3                  |
| Objectives                | 3      | State specific objectives, including any pre-specified hypotheses                                                                                                                                                                                                                                                                                                                                                                                                      | 4                  |
| <b>Methods</b>            |        |                                                                                                                                                                                                                                                                                                                                                                                                                                                                        |                    |
| Study design              | 4      | Present key elements of study design early in the paper                                                                                                                                                                                                                                                                                                                                                                                                                | 6                  |
| Setting                   | 5      | Describe the setting, locations, and relevant dates, including periods of recruitment, exposure, follow-up, and data collection                                                                                                                                                                                                                                                                                                                                        | 6                  |
| Participants              | 6      | (a) <i>Cohort study</i> —Give the eligibility criteria, and the sources and methods of selection of participants. Describe methods of follow-up<br><i>Case-control study</i> —Give the eligibility criteria, and the sources and methods of case ascertainment and control selection. Give the rationale for the choice of cases and controls<br><i>Cross-sectional study</i> —Give the eligibility criteria, and the sources and methods of selection of participants | 6                  |
|                           |        | (b) <i>Cohort study</i> —For matched studies, give matching criteria and number of exposed and unexposed<br><i>Case-control study</i> —For matched studies, give matching criteria and the number of controls per case                                                                                                                                                                                                                                                 | 6                  |
| Variables                 | 7      | Clearly define all outcomes, exposures, predictors, potential confounders, and effect modifiers. Give diagnostic criteria, if applicable                                                                                                                                                                                                                                                                                                                               | 6-9                |
| Data sources/ measurement | 8*     | For each variable of interest, give sources of data and details of methods of assessment (measurement). Describe comparability of assessment methods if there is more than one group                                                                                                                                                                                                                                                                                   | 6-9                |
| Bias                      | 9      | Describe any efforts to address potential sources of bias                                                                                                                                                                                                                                                                                                                                                                                                              | 6                  |
| Study size                | 10     | Explain how the study size was arrived at                                                                                                                                                                                                                                                                                                                                                                                                                              | 6                  |
| Quantitative variables    | 11     | Explain how quantitative variables were handled in the analyses. If applicable, describe which groupings were chosen and why                                                                                                                                                                                                                                                                                                                                           | 9                  |
| Statistical methods       | 12     | (a) Describe all statistical methods, including those used to control for confounding                                                                                                                                                                                                                                                                                                                                                                                  | 9                  |
|                           |        | (b) Describe any methods used to examine subgroups and interactions                                                                                                                                                                                                                                                                                                                                                                                                    | 9                  |
|                           |        | (c) Explain how missing data were addressed                                                                                                                                                                                                                                                                                                                                                                                                                            | 9                  |
|                           |        | (d) <i>Cohort study</i> —If applicable, explain how loss to follow-up was addressed<br><i>Case-control study</i> —If applicable, explain how matching of cases and controls was addressed                                                                                                                                                                                                                                                                              | 9                  |

|                          |     |                                                                                                                                                                                                                                                                                                                                                                                                               |       |
|--------------------------|-----|---------------------------------------------------------------------------------------------------------------------------------------------------------------------------------------------------------------------------------------------------------------------------------------------------------------------------------------------------------------------------------------------------------------|-------|
|                          |     | <i>Cross-sectional study</i> —If applicable, describe analytical methods taking account of sampling strategy                                                                                                                                                                                                                                                                                                  |       |
|                          |     | (e) Describe any sensitivity analyses                                                                                                                                                                                                                                                                                                                                                                         | 9     |
| <b>Results</b>           |     |                                                                                                                                                                                                                                                                                                                                                                                                               |       |
| Participants             | 13* | (a) Report numbers of individuals at each stage of study—eg numbers potentially eligible, examined for eligibility, confirmed eligible, included in the study, completing follow-up, and analysed<br>(b) Give reasons for non-participation at each stage<br>(c) Consider use of a flow diagram                                                                                                               | 10-11 |
| Descriptive data         | 14* | (a) Give characteristics of study participants (eg demographic, clinical, social) and information on exposures and potential confounders<br>(b) Indicate number of participants with missing data for each variable of interest<br>(c) <i>Cohort study</i> —Summarise follow-up time (eg, average and total amount)                                                                                           | 10-11 |
| Outcome data             | 15* | <i>Cohort study</i> —Report numbers of outcome events or summary measures over time<br><i>Case-control study</i> —Report numbers in each exposure category, or summary measures of exposure<br><i>Cross-sectional study</i> —Report numbers of outcome events or summary measures                                                                                                                             | 10-11 |
| Main results             | 16  | (a) Give unadjusted estimates and, if applicable, confounder-adjusted estimates and their precision (eg, 95% confidence interval). Make clear which confounders were adjusted for and why they were included<br>(b) Report category boundaries when continuous variables were categorized<br>(c) If relevant, consider translating estimates of relative risk into absolute risk for a meaningful time period |       |
| Other analyses           | 17  | Report other analyses done—eg analyses of subgroups and interactions, and sensitivity analyses                                                                                                                                                                                                                                                                                                                |       |
| <b>Discussion</b>        |     |                                                                                                                                                                                                                                                                                                                                                                                                               |       |
| Key results              | 18  | Summarise key results with reference to study objectives                                                                                                                                                                                                                                                                                                                                                      | 12    |
| Limitations              | 19  | Discuss limitations of the study, taking into account sources of potential bias or imprecision. Discuss both direction and magnitude of any potential bias                                                                                                                                                                                                                                                    | 15-16 |
| Interpretation           | 20  | Give a cautious overall interpretation of results considering objectives, limitations, multiplicity of analyses, results from similar studies, and other relevant evidence                                                                                                                                                                                                                                    | 15-16 |
| Generalisability         | 21  | Discuss the generalisability (external validity) of the study results                                                                                                                                                                                                                                                                                                                                         | 15-16 |
| <b>Other information</b> |     |                                                                                                                                                                                                                                                                                                                                                                                                               |       |
| Funding                  | 22  | Give the source of funding and the role of the funders for the present study and, if applicable, for the original study on which the present article is based                                                                                                                                                                                                                                                 | 17    |

\*Give information separately for cases and controls in case-control studies and, if applicable, for exposed and unexposed groups in cohort and cross-sectional studies.

**Note:** An Explanation and Elaboration article discusses each checklist item and gives methodological background and published examples of transparent reporting. The STROBE checklist is best used in conjunction with this article (freely available on the Web sites of PLoS Medicine at <http://www.plosmedicine.org/>, Annals of Internal Medicine at <http://www.annals.org/>, and Epidemiology at <http://www.epidem.com/>). Information on the STROBE Initiative is available at [www.strobe-statement.org](http://www.strobe-statement.org).
